# Supplementary material for: Kinesin-6 Klp9 orchestrates spindle elongation by regulating microtubule sliding and growth
Source: eLife. 2021 Jun 3;10:e67489. doi: 10.7554/eLife.67489 (PMC8205488; doi:10.7554/eLife.67489)
Supplement: Figure 1—figure supplement 2—source data 1. [file elife-67489-fig1-figsupp2-data1.xlsx]

## Sheet: Figure S1
Figure 1 - figure supplement 2 - Cell length (µm) at mitosis entry in wild-type and cut7-24 cells
wt	cut7-24
14.2436	14.1209
13.0731	14.0809
15.789	14.4966
15.6579	12.4605
14.2974	13.4438
15.3149	13.8693
13.7572	13.7013
13.3578	14.5283
14.9452	14.7383
13.4038	12.81
15.3633	13.2597
14.2481	12.6491
12.81	12.4636
16.0647	13.281
11.5876	14.019
14.631	12.0808
15.7004	12.3646
12.2523	12.0436
13.8693	14.624
14.7417	12.9056
14.4435	13.0113
13.5934	13.8027
13.2954	12.4636
15.8141	14.8938
13.1988	15.9559
15.2437	14.7773
15.0647	14.0809
12.3574	14.9452
13.9714	14.5679
12.8996	15.1621
16.4994	12.964
14.553	12.3325
13.646	12.4523
13.9163	15.5093
13.9283	13.7637
13.9274	11.8745
16.3208	12.346
16.2264	14.3715
15.6023	12.0691
14.5679	13.0152
16.3865	16.5296
16.2862	13.8129
14.8145	14.7513
15.9888	13.7684
14.3287	13.1258
14.7756	14.0582
15.6146	13.4647
14.6686	13.987
15.4506	14.1534
14.5741	13.7414
13.0083	13.3147
17.1566	11.8928
11.9669	14.9452
18.56	16.1885
11.2183	15.4083
14.2894	15.3016
12.964	15.1469
14.8248	14.3822
15.9431	16.0288
16.1822	12.3044
16.8419	14.2652
16.11	10.9223
14.0882	13.0936
13.9126	11.5211
16.1727	12.1863
16.0925	14.7773
14.9991	13.0388
14.8214	15.2538
15.221	13.8453
12.836	15.9784
14.1181	13.8453
15.576	13.0034
14.624	13.9714
13.2424	13.1784
15.6579	13.6085
15.5002	14.1317
12.8847	14.4718
14.4337	13.5245
17.76	13.5548
15.4506	13.5632
14.3296	12.964
12.6491	15.5867
13.2954	14.351
13.4894	12.5822
	15.3208
	13.1444
	15.8796
	15.988
	12.77
	15.0477
	12.9847
	13.1988
