# Supplementary material for: Kinesin-6 Klp9 orchestrates spindle elongation by regulating microtubule sliding and growth
Source: eLife. 2021 Jun 3;10:e67489. doi: 10.7554/eLife.67489 (PMC8205488; doi:10.7554/eLife.67489)
Supplement: Figure 1—source data 1. [file elife-67489-fig1-data1.xlsx]

## Sheet: Figure 1
Figure 1 B - anaphase B spindle/bundle length over time
Time of anaphase B (min)	wt																																								cut7-24
0	3.07766	2.08615	2.22854	2.48902	2.32964	2.83521	2.89772	3.10664	2.4	2.7247	2.5044	2.79428	2.30755	2.24	2.72	2.57992	3.2	2.13467	2.75274	2.22279	2.14662	3.07766	2.95025	1.87275	2.42124	2.68209	2.79428	2.26274	2.57992	2.44753	2.66293	1.8659	2.26274	2.52982	2.4	2.08	2.63879	2.86217	2.73408	1.6	2.49928	1.0245	1.95305	1.24964	0.932952	0.905097	1.28	1.0245	0.64
1	5.43529	2.62419	3.15163	3.44651	3.28293	3.26337	3.80316	5.05964	2.84872	4.29325	3.68348	3.69389	3.15163	3.84	4.15076	3.64856	4.98317	3.80316	3.64856	3.0568	4.44558	4.44846	4.01278	2.48387	3.2946	2.79428	3.89297	3.04	3.60976	3.29848	3.80316	2.52982	2.73876	2.66293	3.57771	3.57771	2.98905	3.3409	4.04772	2.22854	3.28293	2.22854	1.93329	2.27403	1.6473	1.15378	1.93329	1.81019	1.63169
2	7.48075	4	5.44235	5.02155	4.50848	4.33184	5.86788	5.88748	4.39345	6.4716	4.61511	4.81332	3.7455	4.89506	5.54718	5.20922	6.4716	5.05964	5.12999	4.44846	6.29717	6.00586	6.30327	2.48902	4.65927	4.01278	5.1225	5.31865	4.66476	4.52831	5.28	3.04	4.60678	3.96141	5.54718	4.29325	4.26933	4.72474	5.43294	3.00613	2.97617	3.7455	2.88444	2.4	1.87275	1.93329	2.62419	2.10447	2.52982
3	8.67253	5.95449	6.6818	7.69665	6.48346	6.81269	7.01267	8.05263	6.02501	8	6.66837	6.5892	4.60678	6.404	7.70662	6.404	7.91636	6.23179	6.43192	5.7288	7.95829	7.54718	6.89301	3.26337	5.83945	5.79986	6.7523	6.30327	6.88744	6.67605	7.81383	4.96774	6.31139	5.7288	7.58778	5.68169	5.67041	6.72952	7.0636	4.16	3.57771	4.30813	3.32938	2.72	2.52982	2.93721	4.098	4.15384	3.09011
4	10.2625	7.5353	8.55364	8.85799	7.73977	8	7.98879	9.95221	7.49442	9.94062	8.67253	8.02556	6.59697	8.42093	8.74748	7.60295	9.10736	7.54718	7.5353	7.13571	8.94427	8.95142	7.75464	5.31865	7.10515	7.81547	8.19912	7.37564	8.38284	7.49784	9.27586	6.57754	7.94864	7.12853	10.1849	6.5678	7.30414	8.25823	8.25978	4.90812	3.89626	5.08236	3.96141	3.39411	2.98905	3.44651	4.98317	4.96258	3.86658
5	11.7717	8.97285	9.79012	11.0319	9.8071	9.44542	9.41148	10.4344	9.06369	10.9749	9.9058	8.80436	7.80072	8.95571	10.5648	9.31442	10.7197	8.39657	8.7343	8.196	10.5987	10.8199	9.86955	8.07802	7.21598	9.21355	9.06369	8.66072	9.36376	9.19826	10.8812	7.73977	8.71229	8.0399	10.6241	7.19111	8.92135	9.67438	9.51873	5.36418	4.04772	5.22394	4.42538	4.19981	4.05088	4.26933	5.24839	5.67493	4.72745
6	12.2712	10.6036	11.1335	12.4791	10.9223	11.0599	9.98815	10.5648	10.1698	11.1794	11.1047	10.024	8.87531	10.0201	11.424	10.1823	11.816	8.94427	9.94706	9.64921	10.8257	11.7094	11.0898	8.96571	8.32615	9.96763	9.36376	9.30892	10.7772	10.245	12.0724	9.32952	10.6445	8.83629	12.0117	8.65332	9.4522	10.21	10.8511	6.72952	4.05088		4.97031	4.74906	4.52548	4.98317	6.12405	6.44981	5.79765
7		11.8939	12.2272	13.2474	11.68	11.9715	11.2729	12.2575	11.1634	12.2062	12.0921	10.9363	9.87473	10.4307	12.1316	10.8163	12.6387	10.2413	10.9889	10.2724		12.9083	12.3521	10.26	8.97285	10.7503	11.3881	10.6769	11.6811	11.5211	12.8504	10.7266	11.5953	10.4086	11.7858	9.15222	10.7569	10.1279	10.9976	7.96312	5.14245		5.81749	5.58168				6.89301	5.51014
8		13.1809	12.6441		12.6809	12.6663	11.7183	12.6035	12.1852			11.4362	10.0914		12.4531	11.2922		10.5224	11.4855	11.8724				11.2615	10.245	11.75		11.7986	12.0245			11.472	11.8776	11.3014		9.8091	11.5375		11.5844	8.82469	5.4494			5.58856					5.87442
9							11.4576	12.5587	12.522				10.3754							12.77				12.2242	11.0446	12.4621						11.918					12.0112			9.1214	5.86788			6.53654
10							11.5382	12.8858					11.0214							12.4482					11.5383	13.2221														9.86955	6.02501
11																																									6.52675
12
13
14
15
16
Figure 1 C - cut7-24 bundle growth velocity as a function of bundle length
Bundle length (µm)	Growth velocity (µm/min)
7.2284	0.88482
6.7504	0.94992
6.4498	0.75773
5.5886	0.663
6.0821	0.86496
6.0821	0.50044
5.6817	0.80267
8.2625	0.81117
6.9097	0.73826
6.8707	1.0125
6.8707	0.77379
5.7689	0.59192
4.9419	0.41839
5.6749	0.8266
7.0563	0.86528
7.412	0.67728
4.323	0.5289
3.3941	0.32344
3.8666	0.92563
7.3982	0.83662
6.5659	0.87469
5.8395	0.90272
6.8819	0.84327
6.0229	0.47487
7.1015	0.74952
6.8583	0.65797
4.5056	0.28816
6.7371	0.83487
4.7518	0.45087
4.7057	0.62536
5.1524	0.42927
8.0256	0.84612
7.1357	0.70743
5.6974	0.57795
4.5509	0.74691
6.2482	0.61745
6.4498	0.87828
7.2778	0.7953
7.871	0.89844
6.3397	0.82803
5.5171	0.69223
4.3052	0.3666
5.8395	0.86528
6.6837	0.92937
6.3397	1.0643
3.9582	0.19944
3.3294	0.33769
5.4682	0.7661
5.7243	0.74582
6.5678	0.68553
5.4494	0.50441
6.2727	0.6281
6.394	0.68898
7.3286	0.86178
7.4944	0.39393
5.2994	1.239
6.2318	0.61315
6.5365	0.67977
5.6091	0.64609
4.9832	0.78001
6.394	0.85047
7.0418	0.88821
6.4795	0.65531
6.5287	0.51754
5.4985	0.59298
5.6365	0.8575
5.44	0.59688
5.8744	1.008
6.7219	0.89594
6.6837	0.8755
5.4775	0.60697
4.5311	0.61282
4.9703	0.5693
5.5725	0.70416
6.8483	0.60989
5.6974	0.8796
6.3033	1.0394
6.8352	0.8454
5.6365	0.70983
Figure 1F - Intensity sepctrum of Klp9-GFP along the microtubule bundle at t=1
Distance (µm)	Klp9-GFP intensity (AU) at t=1
0	497	24	111	111	215	0	497	0	140	75	76	211	142	259	162	94	0	0	0	456	53	0	209	264	14	0	27	0	25	276	0	457	0
0.16	246	405	345	345	381	41	246	175	286	276	48	112	342	262	141	319	0	21	0	418	111	0	5	149	0	0	32	0	24	253	21	562	7
0.32	222	383	221	221	539	163	222	208	494	0	164	18	234	290	155	484	266	78	0	532	122	32	202	104	0	0	327	0	165	205	111	569	88
0.48	75	652	382	382	296	219	75	82	582	273	103	233	398	30	130	822	174	113	0	597	96	0	417	126	0	86	221	16	274	157	188	555	142
0.64	246	942	281	281	624	381	246	261	446	195	248	84	349	89	0	1049	260	155	0	350	155	293	671	24	149	93	185	202	198	150	305	658	245
0.8	263	718	176	176	658	258	263	82	396	144	118	290	279	138	174	1128	337	335	0	375	415	554	549	137	0	17	240	169	443	204	247	561	264
0.96	384	658	161	161	502	258	384	146	304	158	206	290	245	239	192	1233	609	253	0	262	251	1358	449	0	8	204	266	147	423	331	54	500	317
1.12	304	704	0	0	538	450	304	91	580	378	316	575	137	212	252	1264	410	343	0	352	7	2125	447	194	10	268	290	220	241	379	295	443	325
1.28	582	603	155	155	518	671	582	0	367	219	269	307	288	194	135	639	481	306	102	171	161	1973	555	268	70	614	58	352	594	613	177	515	185
1.44	698	596	0	0	511	977	698	0	177	223	552	596	91	176	89	417	451	287	122	93	206	1081	732	398	191	663	94	521	762	352	127	582	189
1.6	723	413	0	0	296	865	723	0	192	202	634	419	58	0	283	220	495	244	0	132	245	259	875	365	32	629	339	362	872	586	177	783	148
1.76	751	623	0	0	441	927	751	0	206	162	622	471	0	0	296		472	125	0	0	285	0	577	202	85	655	70	192	1120	825	209	905	165
1.92	970		0	0	364	1461	970		234	0	451	338	0	0	227		136	69	0	0	131		311	407	128	928	336	0	1024	956	138	797	129
2.08	696		0	0	131	1531	696		15	0		771	0	336	196						249			670	170	657	331	0	952	835	84	758	63
2.24	255					1399	255		0			431	0	279	66						338			644	367	370	0		293	827	0	706	11
2.4	157					831	157		0			587		309	0						238			628	222	205	0		231	794	0	595
2.56	29					604	29		0			283									273			495	112	0	0		0	488		577
2.72						255			0															396	290					280		714
2.88																								0	403							670
3.04																									0							488
3.2																																371
Figure 1F - Intensity sepctrum of Klp9-GFP along the microtubule bundle at t=2
Distance (µm)	Klp9-GFP intensity (AU) at t=2
0	90	0	287	13	0	0	365	77	103	0	0	0	0	0	0	72	21	39	156	54	0	0	0	0	254	423	0	0
0.16	157	0	61	135	571	0	254	67	223	0	0	0	0	0	0	127	63	1	126	297	0	177	0	0	79	312	0	0
0.32	283	48	0	302	367	0	39	0	0	0	82	0	0	0	0	147	72	0	13	478	21	14	65	0	0	0	0	106
0.48	244	86	0	315	535	0	326	48	80	0	1	0	83	0	0	24	63	0	98	388	0	0	54	0	0	313	0	205
0.64	90	7	0	347	430	0	354	297	468	0	0	0	83	0	54	267	155	0	21	300	18	7	0	0	0	485	0	180
0.8	155	139	83	244	499	0	458	118	210	0	152	0	0	60	0	150	61	0	247	306	0	0	0	0	0	321	0	112
0.96	361	0	338	173	287	0	221	9	0	0	0	0	84	0	0	63	0	0	67	30	0	0	129	46	0	585	0	370
1.12	237	67	264	137	89	0	392	62	17	0	0	0	68	124	44	155	9	56	0	321	42	0	6	0	0	652	0	268
1.28	181	0	226	332	308	0	230	16	97	0	0	86	146	127	149	226	54	36	97	259	1	0	0	0	65	1133	0	128
1.44	267	55	221	357	240	0	533	0	0	0	145	0	82	209	228	54	174	0	159	273	0	277	12	0	0	829	146	83
1.6	332	507	145	499	0	0	309	35	120	0	82	0	200	357	320	170	0	123	211	186	0	139	83	0	0	842	28	0
1.76	381	429	477	689	0	0	181	54	164	0	0	0	110	407	374	146	0	229	58	303	0	189	61	0	21	848	0	346
1.92	414	204	614	956	0	0	291	0	52	15	95	229	112	551	249	336	0	435	178	264	0	386	0	0	0	686	52	52
2.08	217	0	737	1172	100	0	184	0	206	0	37	501	129	477	175	328	0	360	100	424	0	0	0	0	0	847	185	196
2.24	265	117	685	783	0	69	0	306	286	0	28	1220	0	614	97	295	0	494	58	316	59	0	58	53	59	997	114	0
2.4	183	165	567	256	31	10	0	414	633	0	111	1502	0	709	107	157	87	493	213	348	83	0	390	196	59	1257	0	0
2.56	297	276	283		0	0	84	411	660	0	0	1048	0	719	149	189	208	424	177	270	252	106	371	46	197	1174	128	117
2.72	351	137	102		42	0	0	21	79	79	394	856	22	892	45	152	462	301	260	332	394	141	380	224	354	1319	251	227
2.88	346	85	0		108	0	301	97	311	142	189	180	139	1378	0	123	562	261	292	202	426	350	569	328	129	1801	229	145
3.04	553	340			216	0	29	222	434	351	142	0	201	1743		155	646	352	304	315	278	311	359	0	119	1604	226	316
3.2	362	583			0	0	273	477	225	457	219		356	1775		247	308	309	301	470	439	514	74	0	426	1142	63	455
3.36	292	294			153	180	45	354	315	663	214		643	1078		433	0	246	660	385	377	790	0	99	193	392	301	217
3.52	331	317			93	131	243	318	222	841	367		736	116		437	0	207	367	457	453	781		363	129	254	296	224
3.68	501	161			78	205	300	384	515	1090	571		917	0		543	0	261	730	819	475	628		647	0		598	323
3.84	359	129			184	331	368	481	270	872	819		755			545		287	1191	988	726	273		745	32		1013	487
4	385	503			0	671	442	883	374	580	716		293			239		352	1554	1698	957	130		1075	369		1004	737
4.16	573	636			156	808	927	799	1063	84	399		0			102		489	1385	1987	895	0		1167	20		1072	816
4.32	1037	863			185	449	1189	1097	1406		0		0					769	631	1857	1209			1388	239		537	667
4.48	960	1191			147	54	1371	667	997		0							1017	109	1295	744			1459	373		138	742
4.64	1460	1571			86	18	756	0	1135		0							1296	0	734	343			1265	672		0	587
4.8	1672	1840			476	0	234	0	474									1499		309	75			979	856			0
4.96	1322	2737			863	0	0		95									1530		0	0			384	1052			82
5.12	1117	2020			574	0	0											1358		0	0			1	1051
5.28	371	956			799		0											1117						0	1246
5.44	166	146			629													700							1151
5.6	195				759													185							1423
5.76					760													0							1301
5.92					742													0							619
6.08					908													0							508
6.24					1023																				437
6.4					1497																				78
6.56					2246																				0
6.72					2284
6.88					2158
7.04					1315
7.2					940
7.36					605
Figure 1F - Intensity sepctrum of Klp9-GFP along the microtubule bundle at t=3
Distance (µm)	Klp9-GFP intensity (AU) at t=3
0	330	0	410	0	195	35	0	151	240	53	129	24	0	84	0	0	0	30	98	297	0	451	0	226	55	0	140	0	16	0	0	112
0.16	299	0	515	0	116	93	244	259	130	94	167	0	126	129	0	0	0	0	14	382	0	263	110	266	5	486	0	0	0	0	113	217
0.32	493	0	212	0	280	116	309	297	215	31	130	0	158	77	0	209	0	0	0	237	0	422	0	189	53	177	248	72	50	0	55	26
0.48	548	0	320	0	607	201	326	279	0	102	265	0	0	0	0	78	0	0	0	71	0	376	62	35	175	396	88	0	82	0	216	37
0.64	645	0	368	0	441	299	312	196	0	92	114	0	0	110	0	109	0	0	48	20	0	236	55	27	475	70	147	152	0	0	342	0
0.8	795	0	261	0	465	323	188	0	252	30	187	0	0	0	0	184	0	0	163	65	0	303	83	182	19	317	125	63	0	0	226	0
0.96	718	0	436	0	570	369	218	0	242	0	195	19	0	0	0	226	0	0	366	230	0	169	0	100	161	1	108	0	0	0	181	0
1.12	388	0	331	0	467	406	0	0	343	161	243	137	0	0	0	189	0	210	399	274	44	448	30	150	365	186	0	114	107	0	61	0
1.28	174	0	457	0	653	189	156	0	278	227	106	287	3	0	0	104	0	0	288	197	15	157	0	109	160	0	284	220	28	0	217	221
1.44	0	0	325	0	457	234	165	7	303	132	206	215	15	0	15	122	21	0	408	115	57	231	0	0	168	83	0	107	27	0	36	161
1.6	220	0	281	0	701	557	0	64	255	0	49	83	108	0	0	104	222	81	98	148	0	279	67	186	409	0	182	0	0	0	374	0
1.76	42	0	159	0	607	613	488	271	361	89	75	359	246	0	86	138	233	167	261	184	45	121	6	247	161	0	0	8	242	0	257	48
1.92	0	0	145	0	862	278	294	69	362	150	47	361	216	0	101	171	383	23	238	123	2	195	200	196	233	0	106	0	309	0	23	56
2.08	0	0	173	0	245	189	268	45	367	0	283	452	300	0	131	36	567	0	0	260	0	277	114	258	316	0	0	50	222	0	0	79
2.24	354	0	252	0	337	390	270	0	423	0	587	315	246	0	13	40	589	271	0	450	0	297	146	114	266	0	111	164	236	0	0	84
2.4	416	42	398	0	370	237	0	300	294	77	327	365	107	0	21	79	527	188	0	397	0	87	369	347	198	0	168	185	393	22	291	32
2.56	167	139	273	0	567	217	0	162	233	0	13	344	303	0	0	89	542	271	0	271	0	204	164	223	151	42	338	601	401	58	170	112
2.72	241	213	305	81	683	288	34	282	52	0	180	116	23	50	259	78	551	394	64	219	0	270	152	248	235	0	0	504	645	4	128	257
2.88	314	111	167	178	463	460	319	235	8	0	319	40	69	151	778	0	789	589	0	223	127	230	267	190	121	0	128	393	696	0	163	114
3.04	344	153	296	0	481	575	312	141	250	71	405	59	55	207	1287	77	653	701	0	322	233	116	192	526	19	50	10	343	438	50	78	0
3.2	136	447	248	269	471	948	241	465	174	0	353	83	283	131	1854	159	293	849	0	356	131	251	341	538	301	0	0	421	292	0	259	0
3.36	145	973	431	233	402	1218	92	258	19	0	328	215	405	0	2061	203	243	1277	0	347	171	396	308	359	179	57	0	321	270	96	423	61
3.52	314	1438	518	238	658	1267	187	266	185	0	224	314	152	15	1420	176	375	1308	78	348	98	188	296	141	25	280	0	95	402	124	281	0
3.68	15	1521	811	136	572	1156	372	350	136	0	121	176	354	24	577	239	464	1196	59	362	378	449	0	365	28	207	0	0	496	0	327	0
3.84	37	1747	1015	201	592	825	371	307	322	13	94	413	401	83	64	345	667	743	402	310	430	784	0	272	93	237	255	113	207	0	335	15
4	0	1975	1080	146	604	442	381	394	0	2	213	156	413	193		370	624	169	812	314	517	1009	222	230	57	247	0	189	379	314	605	95
4.16	88	1962	1096	110	1144	27	491	259	163	639	306	44	280	408		236	641	124	982	415	727	1086	124	553	152	446	7	141	345	392	789	293
4.32	102	1592	511	23	942	177	809	305	233	1064	230	56	372	333		370	781		1217	423	1092	1360	290	733	125	415	133	197	508	564	774	589
4.48	154	1165	120	112	1200		461	301	414	1431	126	0	434	406		361	930		1183	383	1560	1328	684	809	0	443	18	269	672	782	477	873
4.64	103	718	139	211	1173		711	209	205	1427	298	97	453	742		638	1326		904	342	1723	1338	519	649	70	515	35	378	1079	837	478	1170
4.8	356	338	27	156	1569		1211	400	157	1035	508	256	463	979		506	2065		237	417	1743	1019	787	784	83	327	404	245	1389	1211	514	1507
4.96	239	129	0	97	1685		1248	626	232	522	537	403	561	904		247	2638		0	632	1260	622	1688	1085	158	499	276	357	1784	982	255	1531
5.12	104			179	1162		1119	612	400	168	985	747	881	888		16	3128		0	875	733	302	1946	1014	161	453	165	279	1492	1239	57	785
5.28	273			0	969		941	838	681	0	800	1284	777	1077			3290			1127	251	0	1499	752	292	203	304	269	1053	1118	0	280
5.44	249			256	365		375	929	678		1101	1502	855	242			2934			1274	0		1513	439	0	269	469	670	619	716		86
5.6	99			678	293		26	1051	597		980	1527	1035	0			1794			1494			695	203	0	123	535	705	250	643
5.76	21			742			0	1280	832		724	1010	982	0			858			1707			262	46	0	0	670	592	0	223
5.92	0			915				1154	769		183	469	598	0			323			1857			0	4	179	0	793	522		98
6.08	0			1153				1068	760			94	647				7			1894			0		141	348	949	553		0
6.24	406			1619				828	418			0	76							1743					26	345	1255	750
6.4	177			1329				430	284				152							1399					0	341	1540	797
6.56	249			874				110	42											934					3	155	1688	1280
6.72	309			662				0	0											411					0	0	1347	1216
6.88	215			788					0											0					275	195	2179	964
7.04	439			773																					133	273	1645	1166
7.2	1041			672																					46	522	1843	825
7.36	1659			529																					30	577	1280	756
7.52	1970			512																					238	666	749	458
7.68	1487			460																					325	774	220	75
7.84	1004			376																					365	991	149
8	431			17																					508	1153	174
8.16				0																					661	984	0
8.32				172																					434	803
8.48				168																					487	900
8.64				151																					369	710
8.8				169																					360	361
8.96				188																					47	43
9.12																									0
9.28
Figure 1G - Klp9-GFP intensity (AU) along the microtubule bundle at t=1, t=2 and t=3
Klp9-GFP intensity (AU)
T=1	t=2	t=3
693.24	1977.76	1796.72
517.06	670.32	1653.25
517.06	858	1659
694.26	2247.27	2620.86
1926.04	1117.56	3831.04
1827.42	1262.8	1056.08
749.34	663.03	2235
588.8	1341.42	2376.4
83.49	1080.72	1500.4
184.44	1434.72	1046.67
531.63	420.07	1738.25
497.62	623.56	1931.92
238.42	952.45	2087.88
307.32	1515.48	1215.88
319.77	213.64	558.26
924	783.36	768.9
334.56	518.83	2776.06
155.73	1275.06	701.68
330.56	1239.03	979.05
278.4	2162.58	1025.46
448	1052.16	2074.95
990.84	378	1760
	244.24	2043.03
	1530.88	2044.74
	2756.04	975.95
	2117.68	783
	1711.5	1612.9
	701.92	1965.78
		2518.1
		894.4
Figure 1H - Klp9-GFP intensity along the MT bundle as a function of bundle length
Bundle length (µm)	Klp9-GFP intensity (AU)
1.76	645.58
1.92	693.24
5.6	1977.76
8.16	1796.72
1.76	494
2.24	517.06
3.04	670.32
5.12	1653.25
1.76	494
2.24	517.06
2.56	858
5.12	1659
1.76	198.72
2.24	694.26
7.52	2247.27
9.12	2620.86
1.6	1161.16
2.88	1926.04
5.76	3831.04
2.24	860.16
2.72	1827.42
4.48	1056.08
1.6	626.08
1.92	749.34
5.28	1117.56
5.92	2235
2.56	515.28
2.88	588.8
5.44	1262.8
6.88	2376.4
2.24	327
2.4	83.49
4.96	663.03
7.04	1500.4
1.28	421.61
2.24	184.44
5.44	1046.67
1.6	697.2
2.08	531.63
5.12	1341.42
6.08	1738.25
1.92	445.48
2.72	497.62
5.76	1080.72
6.4	1931.92
1.28	182.7
2.4	238.42
4.32	1434.72
6.56	2087.88
1.92	335.61
2.56	307.32
4.8	420.07
6.08	1215.88
1.76	312
2.56	319.77
3.2	623.56
4	558.26
1.12	532.44
1.76	924
4.48	952.45
5.28	768.9
1.92	324.72
2.08	334.56
3.84	1515.48
6.24	2776.06
1.76	178.8
2.08	155.73
3.04	213.64
4.32	701.68
2.08	216.48
2.08	330.56
4.32	783.36
5.92	979.05
2.08	52.36
2.08	278.4
3.84	518.83
5.28	1025.46
2.24	275.52
2.72	448
6.24	1275.06
6.72	2074.95
1.44	549.24
1.92	990.84
5.6	1760
1.44	196.47
2.08	747.27
4.8	1239.03
5.44	2043.03
2.24	596.16
3.04	741
5.28	2162.58
6.24	2044.74
2.24	331.43
3.2	354.42
5.28	1052.16
6.08	975.95
1.92	224.77
2.72	769.98
4.32	378
9.28	783
2.08	270.81
2.72	330.04
3.52	244.24
9.12	1612.9
1.44	686.4
2.24	274.92
5.44	1530.88
1.76	817.26
2.72	958.9
6.72	2756.04
2.24	436.88
2.88	1446.66
3.68	2117.68
5.92	1965.78
2.4	176.64
2.56	212.04
4.8	1711.5
6.24	2518.1
2.24	906.78
3.68	629.16
5.12	701.92
5.44	894.4
Figure 1J- Intensity sepctrum of Ase1-GFP along the microtubule bundle at t=1
Distance (µm)	Ase1-GFP intensity (AU)
0	45	602	693	220	435	105	385	1700	2931	0	420	1805	0	225	593	917	0	0	0	1552	568	322	0	219	45	395
0.16	565	1012	1414	513	688	381	533	2294	2285	446	1185	2778	0	792	1538	748	38	0	0	2285	729	629	482	0	565	750
0.32	838	1255	1919	849	794	878	984	2396	1721	517	1835	1917	0	1218	2014	845	280	0	398	2658	822	811	494	0	838	1314
0.48	1096	1551	2188	714	862	1502	1336	2654	1463	769	1944	1622	0	1425	1903	211	563	508	647	2472	804	1282	667	0	1096	1388
0.64	1473	1620	2064	666	1018	2165	1612	2770	857	843	1777	1055	127	1450	1626	370	592	860	357	2251	868	945	712	0	1473	1300
0.8	1472	1624	1888	518	1126	2109	1672	2159	627	670	1632	848	22	1428	1205	644	780	901	178	2216	1006	1020	809	0	1472	1061
0.96	1796	1540	1696	506	1223	2011	1591	1792	463	926	1426	753	159	1196	926	819	593	415	215	2080	860	1046	994	0	1796	1516
1.12	1270	1265	1311	467	1005	1435	1198	1272	379	548	1682	318	68	834	855	659	655	294	152	1784	739	972	1075	0	1270	1411
1.28	1350	1100	988	396	735	848	832	1289	465	757	1464	237	48	588	511	648	842	201	116	1537	699	954	731	0	1350	1124
1.44	1284	957	1002	503	758	349	407	424	384	988	1362	233	0	437	544	593	776	0	147	1287	647	514	777	0	1284	1166
1.6	1428	628	806	598	560	334		738	15	990	1166	127		420	372	571	191	0	45	1005	472	418	307	0	1428	1096
1.76	1243	287	957	336	503	62		512	70	656	717	24		302		995	137	37	0	908	558	387	30	0	1243	1127
1.92	1004	140	762	371	443	67		331	0	680	916	0		65		591	0	0	0	931	401	379	208	0	1004	1057
2.08	289	95	651	505	196				0	814	321	0		0		438	0	0		772	359	571	161	0	289	1292
2.24	592		261		121					871	25					501	0	0		482	287	74	0	0	592	942
2.4	641									694	0					169		0		405	686	0	0	0	641	427
2.56	210									706								0			1141		0	0	210	180
2.72	244									292											1152		0		244	0
2.88										32											575
3.04										1											329
3.2																					160
3.36																					0
3.52
3.68
3.84
Figure 1J- Intensity sepctrum of Ase1-GFP along the microtubule bundle at t=2
Distance (µm)	Ase1-GFP intensity (AU)
0	447	261	447	47	0	350	471	1358	1140	263	100	642	952	188	584	74	1042	506	976	935	182	341	200
0.16	559	428	559	197	0	672	914	1420	1108	409	100	679	1336	440	548	27	1408	214	1408	998	79	173	94
0.32	778	560	778	338	96	534	1223	1609	1122	747	100	629	1422	637	593	61	1586	21	1282	1123	136	0	0
0.48	426	856	426	461	52	160	1068	1567	1220	651	347	853	1343	782	439	0	1594	0	1392	957	361	0	53
0.64	515	626	515	882	361	-54	827	1632	963	786	292	717	1178	669	347	47	1391	0	945	1023	68	0	254
0.8	447	551	447	866	262	58	684	1947	846	778	394	788	1173	572	338	170	993	0	952	968	215	0	350
0.96	675	770	675	869	383	400	495	1935	854	560	250	1088	1084	661	409	216	665	0	898	771	259	0	378
1.12	927	845	927	919	471	509	486	1899	818	688	317	837	1033	643	411	137	469	1	965	778	243	0	371
1.28	722	599	722	794	622	706	618	1482	575	636	517	553	871	861	379	175	343	0	908	915	394	0	391
1.44	877	656	877	674	464	698	667	1114	471	787	344	541	762	811	263	291	243	181	953	739	356	0	411
1.6	504	842	504	827	613	781	639	1161	727	481	482	874	459	1164	235	442	174	430	1175	711	423	0	331
1.76	839	665	839	546	546	477	640	1013	867	456	479	1027	576	1184	227	363	79	401	910	520	253	0	404
1.92	904	644	904	378	627	219	832	913	892	573	276	1105	472	1168	236	326	203	635	804	259	328	0	931
2.08	866	407	866	358	510	365	882	1115	743	477	479	964	543	950	262	295	222	635	779	268	534	0	806
2.24	778	513	778	322	501	235	786	817	599	653	733	992	402	692	287	280	248	687	722	82	721	0	443
2.4	659	727	659	457	402	125	702	936	186	606	718	947	43	761	369	501	274	329	760	120	1002	0	680
2.56	1048	825	1048	730	291	328	601	907		544	817	928	0	970	474	372	244	159	654	230	1270	0	986
2.72	908	830	908	554	415	492	437	1251		641	982	637	119	933	536	516	185	29	844	206	1217	0	872
2.88	1140	900	1140	798	499	647	644	905		379	971		0	1372	416	706	124	0	847	172	1004	0	1406
3.04	1606	683	1606	1048	750	406	944	476		704	435		120	894	340	843	168		546	138	636	0	1130
3.2	1791	375	1791	728	948	382	1011	297		765	285			908	297	807	74		907	302	154	0	1129
3.36	1888	257	1888	579	960	626	1101			682				181	323	894	0		760	198	0	254	1008
3.52	1454	136	1454		986	932	898			799				0	383	836			966	251	0	447	441
3.68	579		579		925	1037	718			648					444	711			676	308		607	227
3.84	300				661	1204	386			704					385	638			734	443		623	0
4	0				292	1519	60			263					462	291			739	493		328	0
4.16					159	1784									610	112			1030	289		64
4.32					0	1091									721	15			1153			0
4.48						484									671				924
4.64						503									688				475
4.8															753				279
4.96															663				572
5.12															475				494
5.28															291				245
5.44															162
5.6															68
5.76
5.92
Figure 1J- Intensity sepctrum of Ase1-GFP along the microtubule bundle at t=3
Distance (µm)	Ase1-GFP intensity (AU)
0	921	0	724	0	0	0	628	347	455	128	77	753	965	31	335	127	0	126	236	0	143	799	0	921	8	388
0.16	441	0	472	218	0	125	579	947	207	684	176	368	1986	266	1038	126	31	0	0	0	124	719	378	441	0	100
0.32	213	46	488	230	46	312	373	1028	133	987	313	7	2322	459	1152	192	159	0	0	398	323	620	621	213	0	1
0.48	299	102	652	226	102	472	342	656	241	1551	306	121	1200	612	742	102	90	0	0	647	67	581	550	299	0	0
0.64	380	191	727	394	191	284	294	539	71	1390	437	109	771	725	324	12	164	0	0	357	3	716	324	380	0	105
0.8	219	26	555	416	26	258	340	532	33	1009	640	81	627	942	318	36	176	0	20	178	147	748	309	219	67	40
0.96	153	0	500	423	-23	153	283	76	125	646	355	180	603	923	142	31	272	14	0	215	194	803	161	153	261	269
1.12	285	287	692	495	287	310	212	205	93	330	615	87	681	904	211	72	229	0	0	152	304	676	0	285	299	245
1.28	341	279	580	426	279	368	294	17	152	458	473	88	652	1008	53	208	208	26	0	116	253	626	0	341	313	436
1.44	402	393	911	339	393	328	382	337	130	401	536	71	720	1334	119	455	257	0	0	147	282	930	0	402	323	481
1.6	362	506	755	456	506	135	237	504	342	380	570	15	1034	1429	264	454	439	0	0	45	325	813	0	362	302	388
1.76	404	700	881	601	700	380	299	512	376	195	705	150	890	1398	383	287	279	0	0	0	152	374	0	404	366	381
1.92	559	508	949	582	508	502	123	358	331	175	671	329	878	1287	123	170	298	8	57	0	278	195	0	559	302	661
2.08	650	510	726	594	510	518	50	348	394	32	720	549	631	1014	154	220	172	0	205	724	269	381	67	650	462	744
2.24	587	960	844	822	960	312	276	532	159	117	695	886	828	706	545	308	61	0	334	480	483	384	35	587	667	748
2.4	418	1240	639	747	1240	560	341	467	0	92	637	1142	1238	374	758	455	185	0	390	273	512	432	10	418	939	1119
2.56	228	1431	1259	1150	1431	562	202	443	0	224	512	1464	1317	27	863	281	309	0	440	439	800	288	0	228	1233	1278
2.72	641	1455	1517	1426	1455	630	268	620	0	0	560	1413	1325	0	796	260	29	0	45	577	843	214	0	641	1277	1078
2.88	605	1220	1557	1375	1220	833	672	511		0	575	1205	1270	366	671	305	191	0	136	694	896	61	124	605	1447	983
3.04	499	910	1957	1087	910	1340	1067	827		176	665	747	1111	398	501	212	243	142	0	922	872	339	182	499	902	1202
3.2	905	983	2180	887	983	1633	1331	796		223	556	384	918	319	501	177	241	130		1171	860	655	83	905	307	456
3.36	1346	1331	1864	803	1331	1610	1738	1001		179	325	141	884	225	326	255	466	195		1355	618	710	118	1346	0	506
3.52	1309	1421	1697	578	1421	1062	2080	1503		61	468		818	255	289	409	521	377		1304	483	546	275	1309	0	384
3.68	1353	913	1296		913	711	1889	1502		425	668		361	269	499	505	793	786		1543	436	427	456	1353		298
3.84	1425	295	909		295	406	1326	1313		861	902		114	242	384	497	756	693		1229	27	455	21	1425		200
4	1115	24	197		24		829	2028		927	1142		83	285	255	567	961	552		845		460	215	1115
4.16	570	1105					390	1663		1389	1037			181	843	720	846	230		1000		470	798	570
4.32	240	1464						1401		1449	1455			230	1535	661	949	0		749		500	886	240
4.48	261	1800						840		1016	1355			157	1872	778	1014			573		175	1309	261
4.64	78	1494						749		521	1512			246	1499	1095	931			1044		0	1295	78
4.8	0	1063								198	935			406	786	1055	656			713		0	1234	0
4.96		846								214	521			333	217	836	646			365			1036
5.12		465								0				464	0	798	227			558			576
5.28		345												281		401	103			746			26
5.44		634												630		236	0			667			0
5.6		440												682						917
5.76		543												551						1059
5.92		288												953						1098
6.08		394												863						1431
6.24		484												1001						1314
6.4		502												992						1006
6.56		467												661						636
6.72		727												666						437
6.88		939												450						290
7.04		953												213						0
7.2		1460																		0
7.36		1585
7.52		1812
7.68		1774
7.84		1372
8		1227
8.16		722
8.32		37
8.48		0
8.64
[truncated: 31 more columns]
