# Supplementary material for: Kinesin-6 Klp9 orchestrates spindle elongation by regulating microtubule sliding and growth
Source: eLife. 2021 Jun 3;10:e67489. doi: 10.7554/eLife.67489 (PMC8205488; doi:10.7554/eLife.67489)
Supplement: Figure 2—source data 1. [file elife-67489-fig2-data1.xlsx]

## Sheet: Figure 2
Figure 2C - Bundle length as a function of time
	Bundle length (µm)
Time (sec)	cut7-24																																								cut7-24 klp9Δ
0	1.35764	1.01193	1.81019	1.28	1.21852	1.43108	1.57582	1.8659	1.70082	2.00479	1.28996	2.049	1.78885	1.78885	2.08	1.50944	1.78885	0.8	1.01193	1.28996	1.78885	1.28996	1.82428	1.24964	1.15378	1.01193	0.932952	0.861626	1.07331	0.96	1.28	2.49928	1.0245	1.95305	1.24964	0.932952	0.905097	1.28	1.0245	0.64	2.14662	1.31939	1.36704	1.43108	1.6	0.861626	0.96	1.36704	1.07331
10	1.37637	1.28996	1.81019	1.6	1.57582	1.47513	1.57582	1.93329	1.92666	2.08	1.31939	1.82428	1.8659	1.63169	2.10447	1.70082	1.76	1.16482	1.37637	1.6	1.78885	1.47513	2.32964	1.24964	1.6473	1.16482	1.21852	1.44	1.35764	1.07331	1.63169	2.97617	0.96	1.78885	1.95305	1.15378	1.01193	1.31939	1.35764	1.01193	1.97909	1.31939	1.47513	1.57582	1.93329	1.15378	1.16482	1.44	1.07331
20	1.73066	1.93329	1.95305	1.31939	1.78885	1.63169	1.78885	2.14662	1.82428	2.48387	1.44	1.92666	2.02386	2.10447	2.26274	1.6	2.44753	1.21852	1.35764	2.08615	1.94648	1.70082	2.13467	1.35764	1.6473	0.932952	1.47513	1.28	1.51789	1.37637	1.67045	2.84872	1.28	1.8659	2.08615	1.21852	1.47513	1.6	1.47513	1.50944	2.17624	1.51789	1.47513	1.57582	1.78885	1.37637	1.57582	1.31939	1.0245
30	1.92666	1.93329	1.63169	1.82428	1.82428	1.63169	1.82428	2.14662	1.81019	2.63879	1.44	2.17624	2.08615	1.78885	2.10447	2.15258	2.29085	1.67045	1.6	2.17624	2.42124	1.6473	2.52982	1.70082	1.6	1.13137	1.37637	1.67045	1.82428	1.47513	1.87275	2.95025	1.28	1.63169	2.08615	1.21852	1.51789	1.78885	1.70082	1.43108	2.13467	1.50944	1.78885	1.43108	2.10447	1.28996	1.35764	1.47513	0.932952
40	2.15258	2.08	2.30755	2.049	2.08	1.97909	1.78885	2.43705	2.049	1.58392	1.97909	2.08615	2.00479	2.29085	2.08	2.08615	2.48387	1.51789	2.049	2.03647	2.29085	1.82428	2.83521	2.049	1.73066	1.70082	1.50944	1.82428	1.87275	1.78885	1.72325	3.17591	1.47513	1.82428	2.27403	1.43108	1.43108	1.78885	1.58392	1.78885	2.14662	1.51789	1.67045	1.67045	1.94648	1.24964	1.58392	1.72325	1.28996
50	2.17624	2.94156	2.4	2.36237	2.17624	2.08	1.47513	2.29085	2.15258	2.17624	1.76	2.22279	2.08	2.10447	2.15258	2.27403	2.44753	2.00479	2.17624	2.15258	2.29085	2.049	3.03579	1.82428	2.049	1.50944	1.8659	1.6	2.00479	1.82428	1.87275	2.71529	2.08	1.78885	2.27403	1.28996	1.15378	2.08	1.95305	1.63169	1.87275	1.44	1.97909	1.67045	2.10447	1.50944	1.70082	1.87275	1.15378
60	2.32964	3.07766	2.52982	2.44229	2.26274	2.08	1.6	2.36237	2.049	2.37857	1.78885	2.36237	1.67045	1.97909	2.4	2.15258	2.26274	1.93329	2.26274	2.48902	2.83521	2.17624	2.88444	1.82428	2.17624	1.50944	1.73066	2.08615	1.93329	1.82428	2.02386	3.28293	2.22854	1.93329	2.27403	1.6473	1.15378	1.93329	1.81019	1.63169	2.62419	1.51789	2.02386	1.92	1.97909	1.70082	1.58392	1.6	1.07331
70	2.43705	3.15569	2.4	2.94156	2.42124	2.52982	1.8659	2.44229	2.049	2.4	1.94648	2.36237	1.87275	2.37857	2.5044	2.30755	2.4	1.97909	2.7247	2.88444	2.68209	2.15258	3.18798	2.00479	2.4	1.50944	1.8659	2.30755	2.08615	2.02386	1.8659	2.94156	2.43705	2.08	2.30755	1.6473	1.16482	1.93329	1.73066	1.6473	1.93329	1.94648	1.82428	1.93329	1.78885	1.81019	1.50944	1.6	1.07331
80	2.64847	3.43535	3.01887	3.2946	2.64847	2.44753	2.08	2.43705	2.36237	2.79886	1.97909	2.14662	2.13467	2.60461	2.73408	2.57992	2.73876	2.42124	2.84872	2.97617	2.83521	2.15258	3.15163	2.00479	2.22279	1.93329	1.6473	1.95305	2.08615	2.13467	2.14662	3.0568	2.83521	2.72	2.29085	2.15258	1.6	2.14662	1.78885	1.8659	1.63169	1.6	2.14662	1.72325	1.97909	1.73066	1.36704	1.44	1.21852
90	2.94156	3.43535	2.79886	3.44651	2.79428	2.60461	2.13467	2.30755	2.22279	3.2	2.10447	2.58488	2.4	2.94156	2.72	2.49928	2.44753	2.72	2.44229	3.07766	3.26337	2.15258	3.44651	2.00479	2.57992	1.63169	1.78885	2.14662	2.27403	2.42124	2.5044	3.2	2.79428	2.30755	2.22854	1.82428	1.47513	2.17624	1.72325	2.4	1.67045	1.76	2.14662	1.72325	2.43705	1.73066	1.47513	1.51789	1.15378
100	3.03579	3.51272	3.0735	3.43535	3.07766	2.89772	2.42124	2.17624	2.5044	3.55258	2.32964	2.52982	2.24	2.88444	3.15163	2.7247	2.88	2.63879	3.00613	2.26274	3.3752	2.37857	3.64856	2.14662	2.66293	1.94648	2.049	2.66293	2.15258	2.44753	2.43705	3.01887	2.95025	2.30755	2.29085	1.92666	1.50944	2.44229	1.78885	2.64847	2.17624	2.02386	2.22279	2.22279	1.94648	1.82428	1.67045	1.51789	1.07331
110	3.03579	3.73181	3.17591	3.73181	2.86217	3.04	2.76203	2.66293	2.57992	3.23975	2.43705	2.58488	2.42124	3.29848	3.00613	2.7247	2.89772	2.79428	3.1435	3.18798	3.45392	2.48902	3.39034	2.22854	3.01887	1.92	1.95305	2.66293	2.15258	2.29085	2.36237	3.3752	3.49445	2.52982	2.75274	1.78885	1.95305	2.66293	1.6	2.5044	1.72325	2.02386	2.22279	2.5044	2.10447	1.70082	1.78885	1.57582	1.16482
120	3.10664	4.00959	3.64856	3.73181	3.39034	2.91973	3.1435	3.0735	2.88444	3.73181	2.88444	2.79428	2.63879	3.95171	3.86658	2.83069	2.42124	3.18798	3.69389	3.45392	3.85331	2.94156	3.65557	2.86217	2.93721	2.08	2.17624	2.62419	2.37857	2.42124	2.48387	2.97617	3.7455	2.88444	2.4	1.87275	1.93329	2.62419	2.10447	2.52982	1.87275	2.02386	2.30755	2.43705	2.10447	1.70082	1.78885	1.67045	1.16482
130	3.39411	4.36715	3.68348	4.07922	3.29848	3.2	3.26337	3.0735	2.97617	4.08862	3.10664	2.63879	3.04	3.7455	3.57771	2.62419	2.26274	3.18798	3.7455	3.52	3.55258	2.95025	3.80316	2.66293	3.00613	2.08	2.4	2.95025	2.37857	2.63879	2.57992	3.15569	3.95171	2.52982	2.36237	2.08	1.72325	2.75274	2.60461	2.43705	2.08	2.08	2.52982	2.79428	1.92	1.92666	1.73066	1.94648	1.12
140	3.71117	4.52831	4.22412	3.2946	3.44651	3.85331	3.39411	3.29848	3.2946	4.00959	2.94156	2.88	3.07766	3.89626	3.72151	3.0568	2.42124	3.44651	4.25131	3.26337	3.92245	2.95025	3.72151	3.32938	2.73408	2.5044	2.17624	3.2	2.48902	3.03579	2.72	3.07766	4.16	2.79886	2.5044	2.22854	1.87275	3.2	2.63879	2.57992	2.29085	2.22854	2.62419	2.73408	1.76	1.92666	1.50944	1.87275	1.31939
150	3.73524	4.72474	4.22412	3.77614	3.39034	3.2358	3.26337	3.52363	3.36381	3.93548	2.94156	2.95025	3.3752	3.80316	3.80316	3.2	2.91973	3.39034	3.84666	3.42041	4.32	2.83069	4.07922	2.97617	2.73408	2.5044	2.66293	3.32938	3.01887	3.15163	3.2	3.01887	4.22412	2.62419	2.42124	2.13467	1.6473	3.68348	3.2358	3.29848	2.08615	2.79428	2.52982	2.79428	1.92	1.92666	1.70082	2.22854	1.07331
160	4.01278	4.72474	4.03822	4.39345	3.65557	3.80316	3.54175	4.098	3.18798	4.22715	2.73876	2.72	3.07766	4.40218	3.86658	3.17591	2.89772	3.50907	4.42538	3.89297	4.49141	3.52363	4.37008	3.29848	2.79428	3.01887	2.95025	3.62745	3.0735	3.29848	3.3752	3.36381	4.16	2.97617	2.13467	1.97909	2.29085	3.32938	3.39411	3.09011	2.4	2.26274	2.49928	2.68209	1.94648	1.70082	1.50944	1.93329	1.16482
170	4.49141	4.86621	3.95171	3.86988	3.23975	3.42041	3.59555	3.97432	3.59555	4.22412	2.68209	2.89772	3.2358	4.40218	3.86658	3.16784	2.89772	3.72151	4.55087	3.95818	4.16	3.16784	4.29325	3.15163	2.94156	3.2	3.2	3.64856	3.28293	3.65557	3.29848	3.36381	4.51699	2.97617	2.17624	2.37857	2.37857	3.55258	3.73524	3.21994	2.26274	1.6	2.37857	3.15163	2.02386	1.95305	1.37637	2.29085	1.15378
180	4.65102	5.00879	4.17229	4.26033	3.59555	3.95818	4.07922	3.97432	3.84666	3.95171	2.88444	3.07766	3.45392	4.72474	4.30813	3.39411	3.36	3.72151	4.77326	4.15384	4.50564	3.73524	3.73181	3.44651	3.3409	3.40165	3.52363	3.62745	3.29848	3.79305	3.49445	3.57771	4.30813	3.32938	2.72	2.52982	2.93721	4.098	4.15384	3.09011	2.14662	2.44753	2.62419	3.00613	1.57582	1.82428	1.6473	2.29085	1.43108
190	4.65102	5.08236	4.52831	4.22715	3.45392	3.92245	4.43694	4	4.1876	4.10112	2.43705	3.07766	3.86988	5.10498	4.30813	3.2	3.2	3.86658	4.89506	4.81332	4.48	3.73524	4.00959	3.36381	3.23975	3.40165	3.52363	3.74892	3.62745	3.93548	3.69389	3.29848	4.72745	3.29848	2.36237	2.68209	3.07766	4.19981	4.46282	3.03579	2.08	1.97909	2.66293	3.21994	1.93329	2.15258	1.6	2.02386	1.43108
200	4.49141	5.44	4.66476	4.15076	3.73524	3.89626	4.5845	4.39345	4.34659	4.55368	2.72	3.29848	3.76595	4.88459	4.55368	3.74892	3.10664	3.79305	5.14245	4.60678	4.64	3.85331	4.00959	3.65557	3.55258	4.53114	3.52363	4	3.55258	3.95171	3.7455	3.44651	4.97031	3.29848	2.66293	2.83521	2.93721	4.64	4.40218	3.29848	2.36237	2.26274	3.10664	3.09011	1.93329	1.92666	1.50944	1.82428	1.36704
210	4.81065	5.72433	4.61511	4.65102	3.39411	4.30813	4.36715	4.80267	4.86621	4.04772	3.15569	3.45392	3.95818	4.97031	4.35247	3.85331	3.39411		5.31865	4.87409	5.30177	4.19981	4.15076	3.65557	3.2	4.30516	3.87319	4.32296	3.96141	3.93548	4.19981	3.50907	5.24107	3.55258	2.79886	2.79428	3.07766	4.30516	4.55368	3.86658	2.049	2.76203	3.23975	2.79428	2.13467	2.17624	1.82428	1.76	1.36704
220	5.4494	5.29694	4.83719	4.50848	3.71117	4.40218	4.44558	4.5845	4.70846	4.60678	3.01887	3.39034	4.42538	5.46113	4.50564	3.74892	2.98905		5.30177	4.96258	5.14245	4.1876	4.22412	3.89626	3.39411	4.30516	4.19981	4.07922	4.19981	4.36715	4.07922	3.69389	5.29936	3.74892	2.72	2.83521	3.57771	4.52548	4.75714	4.00959	1.95305	2.52982	3.2	2.93721	2.42124	2.4	1.44	2.10447	1.16482
230	5.46113	5.51014	4.88459	4.65102	3.84	4.55368	4.61511	5.02155	5.08488	4.35247	3.43535	3.49445	4.42538	5.95449	4.65927	3.73524	3.10664		5.28	4.93931	5.28969	4.42538	4.00959	4.16	3.52	4.29921	4.19981	4.53114	3.77614	4.65102	4.16	3.54175	4.79466	3.73524	2.66293	2.79428	3.43535	4.75714	4.81332	4.01278	2.02386	2.22279	3.10664	3.50907	2.13467	2.15258	1.67045	1.76	1.01193
240	5.12	5.46113	4.97031	4.72745	3.69389	4.85831	4.61511	4.50848	5.41406	4.70846	3.46133	3.84666	4.46282	5.90268	4.89506	3.73524	3.3409		4.96	5.1524	5.28969	4.54805	4.00959	4.25131	3.71117	4.52548	4.30516	4.53114	4.32296	4.72474	4.51699	3.89626	5.08236	3.96141	3.39411	2.98905	3.44651	4.98317	4.96258	3.86658	1.97909	2.97617	3.01887	3.21994	2.48387	2.27403	1.67045	1.72325	1.28
250	5.60914	5.46113	4.9419	4.5817	3.84	4.85831	4.70574	4.88459	5.67493	4.98317	3.23975	3.7455	4.65927	5.95449	5.18212	3.96141	3.3409		5.12999	5.7355	5.46113	4.4138	3.57771	4.04772	3.86988	4.1876	4.64	4.64	4.35247	4.36715	4.30813	3.93548	5.10498	3.84666	3.50907	3.3409	3.57771	4.87672	4.85831	3.95171	2.43705	2.30755	3.15569	2.93721	2.37857	2.03647	1.63169	1.93329	1.47513
260	6.08842	5.68169	5.7355	4.66476	4.1876	4.92894	5.0241	5.02155	5.79986	4.97031	3.79305	3.89626	4.89506	5.81749	5.47752	4.07294			5.60914	5.65685	5.83945	4.64	3.86988	4.50564	3.89297	4.32296	4.86621	4.4138	4.22412	4.72474	4.30813	3.50907	5.15984	3.96141	3.62745	3.3409	3.59555	5.32826	5.05964	4.37008	2.66293	2.4		3.43535	2.08	2.4	1.63169	1.51789	1.76
270	5.93943	6.03775	5.59771	5.08488	4.33184	5.08488	5.32586	5.36656	5.58856	4.82394	3.86658	4.04772	4.81332	5.87442	5.31865	4.1876			5.4494	5.41406	5.7109	4.64	4.37008	4.55368	4.23623	4.42538	4.75176	4.64	4.44846	4.9419	4.52831	3.72151	4.87409	4.53114	3.74892	4.30813	4.15384	5.4494	5.11249	4.66476	2.37857	2.79886		3.2946	2.17624	1.81019	1.57582	1.93329	1.44
280	5.76	5.76888	5.5171	5.08488	3.85331	5.08488	5.28242	5.46113	5.94589	5.14245	4.29325	4.19981	5.1225	6.17401	5.36656	4.07294			5.4494	5.54718	5.7109	4.97803	4.51699	4.61788	4.35247	4.65102	4.75714	4.64	4.61511	5.02155	4.66476	3.65557	5.02155	4.67299	3.74892	4.26933	4.07922	5.4494	5.263	4.66476	2.7247			3.43535	1.72325	2.4	1.57582	2.00479	1.51789
290	5.92864	5.95449	5.95449	5.11249	4.64	5.62736	5.68169	5.63645	6.1574	6.2482	4.01278	4.10112	4.85831	6.17401	5.63645	4.32296			5.63645	5.5725		5.09243	4.81332	4.77326	4.60678	4.44846	4.75176	4.53114	5.05964	5.22394	4.83719	4.04772	4.87409	4.44846	3.62745	3.89297	4.26933	5.1225	5.56561	4.93931	2.62419			3.15569	1.8659	2.62419	1.6	1.8659	1.63169
300	6.08842	6.17401	5.87442	5.23129	3.84	5.39748	5.76888	5.6	6.43988	6.63759	4.37008	3.95171	5.1648	6.03775	5.77996	4.19981			6.13241	6.02289		4.98317	4.66476	4.39345	4.30813	4.8	4.86621	4.75714	4.83719	5.15984	5.1225	4.04772	5.22394	4.42538	4.19981	4.05088	4.26933	5.24839	5.67493	4.72745	2.71529			3.36381	1.92666	2.93721	1.37637	2.049	1.78885
310	6.2482	6.75041	5.95449	5.05964	4.50564	5.36656	6.17401	5.7288	6.36993	5.7109	4.22412	4.45708	5.36418	6.394	5.93943	4.098			6.09892	6.02289		5.22394	4.51699	4.55087	4.37008	5.05964	5.09243	5.20922	4.80267	5.41406	5.41406	4.15384	4.79466	4.77326	4.32296	4.42538	4.5817	5.3761	5.88313	5.02155	2.60461			3.43535	2.15258	2.52982	1.50944	2.37857	1.31939
320	6.08842		5.81749	5.05964	4.32	5.52406	5.68169	5.95234	6.65492	5.86788	4.5817	4.30813	5.263	6.5678	6.11359				6.36993	6.37194		5.34745	4.72474	4.52548	4.37008	5.3761	5.65685	5.09243	5.10498	5.32586	5.19199	3.84666	5.1524	4.67299	4.61511	4.39345	4.68393	5.95234	5.82409	5.16976	2.60461			3.23975	1.81019	2.049	1.50944	2.049	1.36704
330	6.11359		6.09262	5.1648	4.05088	5.68169	5.99093	5.85915	6.87069	6.29107	4.43694	4.51699	5.36418	6.65877	5.92				6.68371	5.88748		5.43529	5.36656	4.82394	4.5845	5.3761	5.43529	5.31865	4.66476	5.79765	5.63645	4.04772		4.70574	4.61511	4.36715	4.49141	5.7288	5.86788	5.23129	2.62419			3.15163	2.03647	2.52982	1.6473	2.049	1.78885
340	6.4		5.65685	5.5171	4.17229		6.17401	5.90051	6.37194	6.4716	4.37008	4.10112	5.67493	6.4359	5.76				6.404	6.44981		5.5541	4.87409	5.15984	4.5817	5.50549	5.54487	5.43529	5.1524	5.7355	5.50549	4.10112		4.61511	4.52831	4.34659	4.65102	6.03775	6.24	5.58168	2.03647			3.57771	1.8659		1.73066	1.81019	1.78885
350	6.92636		5.81749	5.47284	4		6.31139	6.2482	6.5892	5.99733	4.5845	4.50848	5.61826	7.01267	6.2482				6.44186	6.56585		5.67493		5.15984	5.02155	5.50549	5.88313	5.43058	4.88459	5.59771	5.47284	4.05088		4.80267	4.61511	4.34659	4.81065	5.81749	6.30327	5.29694	2.27403			3.36381	2.03647		1.57582	2.08615	1.87275
360	6.73712		6.09262	5.43294	4.01278		6.37194	6.04834	6.37194	6.49726	4.72745	4.44558	5.67493	6.75041	6.59115				6.33972	6.56585		5.20922		5.18212	5.00879	5.76888	5.7711	5.43058	4.97031	5.95449	5.34745	4.05088		4.97031	4.74906	4.52548	4.98317	6.12405	6.44981	5.79765	2.15258			3.59555	2.08615		1.36704	1.82428	1.82428
370	7.05635		6.31139	5.58856	4.1876		6.66837	6.45774	6.72952	6.1574	4.66476	4.30813	5.31865	6.97057	6.92636				6.44186	6.45774		5.43529		5.00112	5.08236	6.08211	5.99733	5.54487		5.81749	5.67493	4.20894		5.32586	5.10498	4.82394	4.82394	6.31139	6.74472	5.65685	2.27403			3.21994	1.93329		1.67045	2.37857	1.47513
380	6.75041		6.44981	5.39748	4.0287		6.87069	6.68371	6.44981	6.44981	5.65459	4.72474	5.46816	7.02544	6.4716				6.6818	5.99733		5.90051		5.47752	5.24107	5.85915	5.88313	5.7711		6.25843	5.77996	4.1876		5.5171	5.15984	4.82394	4.97031	6.394	6.74472	5.65685	2.17624				2.08		1.78885	1.92666	1.94648
390	7.05635		6.44981	5.43294	4.48		6.87069	6.45774	6.53067	6.87069	5.44235	4.65102		6.88744	6.59115				6.9319	6.33972				5.31865	5.02155	5.50549		5.54487			5.77996	4.50564		5.32586	5.15984	5.12999			6.87255	5.65685	2.08615				2.08615		1.94648	1.92666	1.63169
400	7.05635			4.92894	4.20894		6.80706	6.56585			5.76888	4.39345		7.05635	6.6086				6.62987					5.46113	5.32586	5.90268		5.99733			5.90051	4.81065		5.68169	5.22394	5.44			6.80706	5.65685	2.44229				1.95305		1.94648	2.15258	1.57582
410	7.22839			5.20922	4.07922		7.10695	6.33972			5.58856	4.66476			6.4716				6.59697					5.62053	5.41406	5.59771					5.99733	4.97031		5.68169	5.22394	5.60914			6.1574	5.72433	2.17624				2.17624		2.22854	1.92666	1.63169
420	7.06903			5.20922	4.34659		7.46362	6.792			5.72433	4.74906			6.94665				7.39816					5.77996	5.5171	6.03775					5.88748	5.14245		5.81749	5.58168				6.89301	5.51014	2.44229				1.95305		2.29085	2.27403	1.6
430	6.52871			5.39748	3.84		6.88744	6.9097			5.02155	4.9419			6.81269									6.25843	5.37848	6.12405					6.11359	5.28969		6.23179	5.58168				7.04182	5.86788	2.5044				1.8659		2.36237	2.17624	1.47513
440	6.32961				4.07922		7.02544	6.88186			5.46816	4.80267			6.84082									6.09892	5.68169	5.95449					6.59697	5.28969		5.93943	5.44					5.93943	2.72				1.78885		2.14662	1.95305
450	7.10155				4.01278		7.16436	6.7523			5.46816	4.86621			7.0636									5.93943	5.68169	5.59771					6.33972	5.14245			5.65685					6.01438	2.75274				1.95305		1.93329	2.03647
460	6.9889				3.64856		7.16436					4.86621			7.0636									5.93943	5.81749	5.87442					6.59697	4.97031			5.36656					6.09262	2.60461				2.049		2.48387	2.15258
470					4.04772		7.37043					4.87409			7.41199									6.75041	6.04834	6.17401					6.22357	5.63645			5.7355					6.23179	2.7247				2.17624		2.37857	2.03647
480					4.07922		7.72818								7.29712									6.89672	5.95234	6.23179					6.57754	5.4494			5.58856					5.87442	2.52982				2.60461		2.13467	1.82428
490					4.22412		7.51319								7.34084									6.9097	6.17608	6.513						5.60914			5.86788					6.03775	2.26274				2.37857		2.17624
500					4.50848		7.65663								7.34084									6.9097	5.92216	6.29717						5.97381			6.03139					6.47951	2.37857				1.70082		2.02386
510					4.83719		7.96312								7.34084									7.04727	5.90051							5.93943			6.53654					6.03775	2.62419				1.92666		2.10447
520					4.88459		8.11123								7.13571									6.88744	6.45774							5.77996			6.47951						2.7247				1.95305		2.44753
530					4.83719		7.96312																	6.72762	6.33972							5.99733			6.30327						2.7247				2.27403		2.10447
540					5.1225		8.05263																	7.68	6.56585							5.86788			6.53654						2.66293						2.29085
550					5.6		7.9438																	7.36695	6.45774							6.15532									2.4						2.29085
560																																									2.66293						2.13467
570																																									2.88444						2.17624
580																																									2.62419						2.08
590																																									3.10664						1.6473
600																																									3.01887						2.22279
610																																									2.97617						2.17624
620																																									2.93721						2.36237
630																																									2.86217						2.22854
640																																									2.86217						2.08
650																																									2.94156						1.8659
660																																									2.86217						2.22279
670																																									3.15163						2.00479
680																																									2.88444						1.95305
690
700
710
720
730
[truncated: 71 more columns]
