# Supplementary material for: Kinesin-6 Klp9 orchestrates spindle elongation by regulating microtubule sliding and growth
Source: eLife. 2021 Jun 3;10:e67489. doi: 10.7554/eLife.67489 (PMC8205488; doi:10.7554/eLife.67489)
Supplement: Figure 3—figure supplement 4—source data 1. [file elife-67489-fig3-figsupp4-data1.xlsx]

## Sheet: Figure S3
Figure 3 - figure supplement 4 - Cls1-3XGFP intensity (AU) as a function of time (min) during anaphase B in wild-type and klp9Δ cells
Time of anaphase B (min)	wt																				klp9Δ
1	4397.66	2575.36	4518.6	5286.3	4439.2	4182.96	3786.21	4117.2	4020.87	4322.15	6895.44	5317.44	6232.41	4851.8	4193.07	2674.72	2033.19	3537.94	5019.68	4904.64	5678.15	7905	4318.72	5657.6	6830.88	3658.18	5500.74	6078.86	5995.08	6468.98	4737.6	4502.4	4329	3947.85	3711.42	4681.04	4642.94	7503.36	4472.72	2740.08
2	3906.34	2362.08	4923.6	5817.15	4349.61	4013.3	4231.68	4233.76	4045.43	3949.92	6440.28	5291.59	6448.48	5347.79	4539.34	2549.24	5390.55	3128.3	5294.2	4684.66	6061.44	7988.64	4484.25	4515.3	5570.7	4240.8	5946.6	5691.6	5588.48	7702.2	5638.34	4787.2	4958.46	5166.24	4184.15	3666.3	4161	7253.5	4338.97	3176.76
3	3915.95	2504.75	4478.58	6830.11	4566.2	5183.01	3787.84	4099.2	4655.94	4497.9	6698.33	4800.55	6531.84	5359.06	4079.86	2838.24	6396.95	3340.82	5640.96	5733.25	5317.32	7365.6	4450.96	4774.8	6822.24	4264.96	5732.1	5391	5192.46	8172.34	6610.35	5337.09	5041.4	5245.2	3788.2	4349.45	4428.8	7484.4	4265.6	3015.68
4	3956.75	2939.4	5419.05	6403.2	4491.5	5562.06	3473.75	4656.05	4363.8	4218.94	6730.9	4544.1	6079.16	5813.85	4784.7	2723	5642.22	3272.75	5743.08	6441.22	6141.8	7276.08	4169.3	5108.66	6413.58	4012.08	5113.88	5958.63	5602.3	6859.8	6559.8	5062.3	4985.5	5269.76	4080.3	4280.4	4587.57	7553.8	3640.86	3322.88
5	3982.08	3268.26	6489.76	6098.4	4389.66	5230.44	3318.2	4943.12	4742.97	4255.8	7334.1	5419.96	6022.4	6268.58	4843.56	3364.72	6435.72	3181.08	6003.48	5961.66	6173.52	7254.58	3922.74	5016.96	7807.25	4408.2	5712	5791.5	5567.14	7819.29	6153.5	4853.16	4188.35	5102.05	3792.2	4555.82	6605.61	7038	4198.43	3933.29
6	4183.38	3300.88	6740.82	6972	4691.2	5811.75	3934.42	4763.79	4448.04	5559	7183.47	5816.05	5921.16	6462.72	3926.2	3099.46	5800.13	3685.32	5554.25	5801.76	6029.32	8016	3914.24	5149.6	6262	4500.72	5355.87	5455.35	5203.67	7872.51	6530.22	4705.96	4513.86	4478.76	4481.73	4442.76	4352.68	7246.98	3391.11	3439.08
7	4220.37	2887.68	5883.04	5900.44	4479.3	6056.45	3888.78	4069.87	5779.98	4355.52	6649.38	3945	6598.35	6408	4926.77	2607.95	6587.75	3523.95	5291.46	6490.86	6646.4	7508.04	4013.04	5453.4	7120	5237.1	5036.91	6402.24	4811.64	7796.88	6915.44	4261.32	4693.36	5056.73	4742.92	4680.78	3709.99	5685.75	4516.44	3436.84
8	3723.1	2924.11	4728.72	5453.7	4791.55	6646.31	4079.66	4496.9	5456.64	3901.89	7832	4548.04	5375.57	6020.8	4275.12	2711.64	6959.76	3599.16	5208.25	5512.64	6496.38	7792.84	3899.34	6267.68	7982.86	4903.87	5280.74	5384.61	4150.55	6702.36	5270.95	4137.4	4188.2	5764.44	3856.05	4650.24	3963.4	6749.76	3203.52	3603.6
9	3631.54	4018.37	5010.72	5842.56	5300.24	5912.4	3573.48	4483.72	5359.77	4352	7896	4588.8	5224.1	5598.86	5234.1	2634.66	6330.56	3036.46	6134.16	5513.2	6734	7906.56	2918.16	5224.24	7557.73	5129.19	5556.16	5415.12	4500.72	8605.08	4841.28	4439.38	4988.06	5368.33	4018.92	4750.76	3977.04	7100.8	3526.3	3197.18
10	3702.7	3014.55	4191.2	5167.8	5346.4	7930.84	2785.3	3953.52	5571.83	3445.2	7161.88	4341.76	5674.9	6197.76	3923.92	3065.01	5927.79	3518.28	5691.3	4732.14	7176.96	7750.05	3690.75	5340.55	7744.9	4628.59	5148.55	5167.04	4483.57	7249.8	5350.11	4337.52	4057.79	4985.25	3768.6	4462.92	4551	6754.56	3149.25	2889.72
11	3834.48	1540.08	3053.47	6560.1	4988.15	7520.17	2963.7	3706.82	5688.54	2975	5669.18	4771.84	5958	5455.47	4232.43	3272.62	5294.6	3312.53	4805.96	4376.14	6562.08	7594.02	3268.46	5236.14	7351.48	4095.84	7295.2	5565.29	4157.63	7678.8	5529.8	4162.08	5628.48	5046.48	4176.66	5657.84	3406.56	6875.36	4365.63	3171.12
12	3303.44			5592.36	5425.31	6737.4	3988.08	2260.08	4768.4	2284.88	5853.96	4650.75	5141.76	5246.1	4254.12	2658.8	6784.1	3711.26	5150.52	5512.78	6173.2	7061.88	3666.47	4563.2	7521.99	4400.44	3605.1	4312.5	4246.34	6100.25	5522.78	4231.68	5986.97	5790.8	4134.38	4625.76	4302.48	7464.92	4542.72	3211.12
13	2951.38			4435.76	3653.04	6120	2660.12				5891.57	3779.1		4444.4	4380.11		6328.08		4131.36	5213.04	5522.76	7458.78	3629.5	4836.52	7088.12	4427.84	4846.32	4579	4328.66	6119.12	5653.23	4385.04	4986.24	4585.56	3875.9	4815.95	3265.99	6989.64	3943.54	2846.16
14																					5732.37	7846.58	3734.28	5008.25	6866.91	3943.38	5116.14	5306.63	4180.38	5538.8	5157.46	4882.24	4270.96	4446.27	3859.5	4750.2	3503	7542.2	4335.76	2833.6
15																					6102.25	5891.52	3646.53	4940.22	6194.55		5076.14	5174.12	3621.17	6448.2	5169.56	4664.4	4563.3	3879.44	2936.64	4776.72	3337.1	5971.2	4402.58	3146.88
16																					5609.6	6429	3203.22	4944.72	6582.08		4334.66	5809.8	3637.29	6153.28	5565	4854.15	3937.37	4321.54	3110.25	4819.15	3087.3		3529.82	3056.94
17																					5348.64	6450.48		4246.12	478.17		3981.79	5157.36	2761.65	5624.79	5007.8	4711.27	4614.21	3281.64	3513.14	4086.88			3787.8	3273.6
18																					5501.92	6784.8			7422.16		3284.48	5059.84	3120.15	5966.4	4974.57	4734.4	4252.34	4021.35	3216.76				3570.68	3466.1
19																					5250.84	6023.97			4970.36		4095.54		3238.7	4376.7	4442.1	4182.76	4435.2						3498.99
20																						6185.43			6092.74		4428.54					4429.28							3133.16
21
22
23
24
25
