# Supplementary material for: Kinesin-6 Klp9 orchestrates spindle elongation by regulating microtubule sliding and growth
Source: eLife. 2021 Jun 3;10:e67489. doi: 10.7554/eLife.67489 (PMC8205488; doi:10.7554/eLife.67489)
Supplement: Figure 3—source data 1. [file elife-67489-fig3-data1.xlsx]

## Sheet: Figure 3
Figure 3B - Bundle length (µm) as a function of time
time (sec)	cut7-24																																								cut7-24 klp9Δ
0	1.35764	1.01193	1.81019	1.28	1.21852	1.43108	1.57582	1.8659	1.70082	2.00479	1.28996	2.049	1.78885	1.78885	2.08	1.50944	1.78885	0.8	1.01193	1.28996	1.78885	1.28996	1.82428	1.24964	1.15378	1.01193	0.932952	0.861626	1.07331	0.96	1.28	2.49928	1.0245	1.95305	1.24964	0.932952	0.905097	1.28	1.0245	0.64	2.14662	1.31939	1.36704	1.43108	1.6	0.861626	0.96	1.36704	1.07331
10	1.37637	1.28996	1.81019	1.6	1.57582	1.47513	1.57582	1.93329	1.92666	2.08	1.31939	1.82428	1.8659	1.63169	2.10447	1.70082	1.76	1.16482	1.37637	1.6	1.78885	1.47513	2.32964	1.24964	1.6473	1.16482	1.21852	1.44	1.35764	1.07331	1.63169	2.97617	0.96	1.78885	1.95305	1.15378	1.01193	1.31939	1.35764	1.01193	1.97909	1.31939	1.47513	1.57582	1.93329	1.15378	1.16482	1.44	1.07331
20	1.73066	1.93329	1.95305	1.31939	1.78885	1.63169	1.78885	2.14662	1.82428	2.48387	1.44	1.92666	2.02386	2.10447	2.26274	1.6	2.44753	1.21852	1.35764	2.08615	1.94648	1.70082	2.13467	1.35764	1.6473	0.932952	1.47513	1.28	1.51789	1.37637	1.67045	2.84872	1.28	1.8659	2.08615	1.21852	1.47513	1.6	1.47513	1.50944	2.17624	1.51789	1.47513	1.57582	1.78885	1.37637	1.57582	1.31939	1.0245
30	1.92666	1.93329	1.63169	1.82428	1.82428	1.63169	1.82428	2.14662	1.81019	2.63879	1.44	2.17624	2.08615	1.78885	2.10447	2.15258	2.29085	1.67045	1.6	2.17624	2.42124	1.6473	2.52982	1.70082	1.6	1.13137	1.37637	1.67045	1.82428	1.47513	1.87275	2.95025	1.28	1.63169	2.08615	1.21852	1.51789	1.78885	1.70082	1.43108	2.13467	1.50944	1.78885	1.43108	2.10447	1.28996	1.35764	1.47513	0.932952
40	2.15258	2.08	2.30755	2.049	2.08	1.97909	1.78885	2.43705	2.049	1.58392	1.97909	2.08615	2.00479	2.29085	2.08	2.08615	2.48387	1.51789	2.049	2.03647	2.29085	1.82428	2.83521	2.049	1.73066	1.70082	1.50944	1.82428	1.87275	1.78885	1.72325	3.17591	1.47513	1.82428	2.27403	1.43108	1.43108	1.78885	1.58392	1.78885	2.14662	1.51789	1.67045	1.67045	1.94648	1.24964	1.58392	1.72325	1.28996
50	2.17624	2.94156	2.4	2.36237	2.17624	2.08	1.47513	2.29085	2.15258	2.17624	1.76	2.22279	2.08	2.10447	2.15258	2.27403	2.44753	2.00479	2.17624	2.15258	2.29085	2.049	3.03579	1.82428	2.049	1.50944	1.8659	1.6	2.00479	1.82428	1.87275	2.71529	2.08	1.78885	2.27403	1.28996	1.15378	2.08	1.95305	1.63169	1.87275	1.44	1.97909	1.67045	2.10447	1.50944	1.70082	1.87275	1.15378
60	2.32964	3.07766	2.52982	2.44229	2.26274	2.08	1.6	2.36237	2.049	2.37857	1.78885	2.36237	1.67045	1.97909	2.4	2.15258	2.26274	1.93329	2.26274	2.48902	2.83521	2.17624	2.88444	1.82428	2.17624	1.50944	1.73066	2.08615	1.93329	1.82428	2.02386	3.28293	2.22854	1.93329	2.27403	1.6473	1.15378	1.93329	1.81019	1.63169	2.62419	1.51789	2.02386	1.92	1.97909	1.70082	1.58392	1.6	1.07331
70	2.43705	3.15569	2.4	2.94156	2.42124	2.52982	1.8659	2.44229	2.049	2.4	1.94648	2.36237	1.87275	2.37857	2.5044	2.30755	2.4	1.97909	2.7247	2.88444	2.68209	2.15258	3.18798	2.00479	2.4	1.50944	1.8659	2.30755	2.08615	2.02386	1.8659	2.94156	2.43705	2.08	2.30755	1.6473	1.16482	1.93329	1.73066	1.6473	1.93329	1.94648	1.82428	1.93329	1.78885	1.81019	1.50944	1.6	1.07331
80	2.64847	3.43535	3.01887	3.2946	2.64847	2.44753	2.08	2.43705	2.36237	2.79886	1.97909	2.14662	2.13467	2.60461	2.73408	2.57992	2.73876	2.42124	2.84872	2.97617	2.83521	2.15258	3.15163	2.00479	2.22279	1.93329	1.6473	1.95305	2.08615	2.13467	2.14662	3.0568	2.83521	2.72	2.29085	2.15258	1.6	2.14662	1.78885	1.8659	1.63169	1.6	2.14662	1.72325	1.97909	1.73066	1.36704	1.44	1.21852
90	2.94156	3.43535	2.79886	3.44651	2.79428	2.60461	2.13467	2.30755	2.22279	3.2	2.10447	2.58488	2.4	2.94156	2.72	2.49928	2.44753	2.72	2.44229	3.07766	3.26337	2.15258	3.44651	2.00479	2.57992	1.63169	1.78885	2.14662	2.27403	2.42124	2.5044	3.2	2.79428	2.30755	2.22854	1.82428	1.47513	2.17624	1.72325	2.4	1.67045	1.76	2.14662	1.72325	2.43705	1.73066	1.47513	1.51789	1.15378
100	3.03579	3.51272	3.0735	3.43535	3.07766	2.89772	2.42124	2.17624	2.5044	3.55258	2.32964	2.52982	2.24	2.88444	3.15163	2.7247	2.88	2.63879	3.00613	2.26274	3.3752	2.37857	3.64856	2.14662	2.66293	1.94648	2.049	2.66293	2.15258	2.44753	2.43705	3.01887	2.95025	2.30755	2.29085	1.92666	1.50944	2.44229	1.78885	2.64847	2.17624	2.02386	2.22279	2.22279	1.94648	1.82428	1.67045	1.51789	1.07331
110	3.03579	3.73181	3.17591	3.73181	2.86217	3.04	2.76203	2.66293	2.57992	3.23975	2.43705	2.58488	2.42124	3.29848	3.00613	2.7247	2.89772	2.79428	3.1435	3.18798	3.45392	2.48902	3.39034	2.22854	3.01887	1.92	1.95305	2.66293	2.15258	2.29085	2.36237	3.3752	3.49445	2.52982	2.75274	1.78885	1.95305	2.66293	1.6	2.5044	1.72325	2.02386	2.22279	2.5044	2.10447	1.70082	1.78885	1.57582	1.16482
120	3.10664	4.00959	3.64856	3.73181	3.39034	2.91973	3.1435	3.0735	2.88444	3.73181	2.88444	2.79428	2.63879	3.95171	3.86658	2.83069	2.42124	3.18798	3.69389	3.45392	3.85331	2.94156	3.65557	2.86217	2.93721	2.08	2.17624	2.62419	2.37857	2.42124	2.48387	2.97617	3.7455	2.88444	2.4	1.87275	1.93329	2.62419	2.10447	2.52982	1.87275	2.02386	2.30755	2.43705	2.10447	1.70082	1.78885	1.67045	1.16482
130	3.39411	4.36715	3.68348	4.07922	3.29848	3.2	3.26337	3.0735	2.97617	4.08862	3.10664	2.63879	3.04	3.7455	3.57771	2.62419	2.26274	3.18798	3.7455	3.52	3.55258	2.95025	3.80316	2.66293	3.00613	2.08	2.4	2.95025	2.37857	2.63879	2.57992	3.15569	3.95171	2.52982	2.36237	2.08	1.72325	2.75274	2.60461	2.43705	2.08	2.08	2.52982	2.79428	1.92	1.92666	1.73066	1.94648	1.12
140	3.71117	4.52831	4.22412	3.2946	3.44651	3.85331	3.39411	3.29848	3.2946	4.00959	2.94156	2.88	3.07766	3.89626	3.72151	3.0568	2.42124	3.44651	4.25131	3.26337	3.92245	2.95025	3.72151	3.32938	2.73408	2.5044	2.17624	3.2	2.48902	3.03579	2.72	3.07766	4.16	2.79886	2.5044	2.22854	1.87275	3.2	2.63879	2.57992	2.29085	2.22854	2.62419	2.73408	1.76	1.92666	1.50944	1.87275	1.31939
150	3.73524	4.72474	4.22412	3.77614	3.39034	3.2358	3.26337	3.52363	3.36381	3.93548	2.94156	2.95025	3.3752	3.80316	3.80316	3.2	2.91973	3.39034	3.84666	3.42041	4.32	2.83069	4.07922	2.97617	2.73408	2.5044	2.66293	3.32938	3.01887	3.15163	3.2	3.01887	4.22412	2.62419	2.42124	2.13467	1.6473	3.68348	3.2358	3.29848	2.08615	2.79428	2.52982	2.79428	1.92	1.92666	1.70082	2.22854	1.07331
160	4.01278	4.72474	4.03822	4.39345	3.65557	3.80316	3.54175	4.098	3.18798	4.22715	2.73876	2.72	3.07766	4.40218	3.86658	3.17591	2.89772	3.50907	4.42538	3.89297	4.49141	3.52363	4.37008	3.29848	2.79428	3.01887	2.95025	3.62745	3.0735	3.29848	3.3752	3.36381	4.16	2.97617	2.13467	1.97909	2.29085	3.32938	3.39411	3.09011	2.4	2.26274	2.49928	2.68209	1.94648	1.70082	1.50944	1.93329	1.16482
170	4.49141	4.86621	3.95171	3.86988	3.23975	3.42041	3.59555	3.97432	3.59555	4.22412	2.68209	2.89772	3.2358	4.40218	3.86658	3.16784	2.89772	3.72151	4.55087	3.95818	4.16	3.16784	4.29325	3.15163	2.94156	3.2	3.2	3.64856	3.28293	3.65557	3.29848	3.36381	4.51699	2.97617	2.17624	2.37857	2.37857	3.55258	3.73524	3.21994	2.26274	1.6	2.37857	3.15163	2.02386	1.95305	1.37637	2.29085	1.15378
180	4.65102	5.00879	4.17229	4.26033	3.59555	3.95818	4.07922	3.97432	3.84666	3.95171	2.88444	3.07766	3.45392	4.72474	4.30813	3.39411	3.36	3.72151	4.77326	4.15384	4.50564	3.73524	3.73181	3.44651	3.3409	3.40165	3.52363	3.62745	3.29848	3.79305	3.49445	3.57771	4.30813	3.32938	2.72	2.52982	2.93721	4.098	4.15384	3.09011	2.14662	2.44753	2.62419	3.00613	1.57582	1.82428	1.6473	2.29085	1.43108
190	4.65102	5.08236	4.52831	4.22715	3.45392	3.92245	4.43694	4	4.1876	4.10112	2.43705	3.07766	3.86988	5.10498	4.30813	3.2	3.2	3.86658	4.89506	4.81332	4.48	3.73524	4.00959	3.36381	3.23975	3.40165	3.52363	3.74892	3.62745	3.93548	3.69389	3.29848	4.72745	3.29848	2.36237	2.68209	3.07766	4.19981	4.46282	3.03579	2.08	1.97909	2.66293	3.21994	1.93329	2.15258	1.6	2.02386	1.43108
200	4.49141	5.44	4.66476	4.15076	3.73524	3.89626	4.5845	4.39345	4.34659	4.55368	2.72	3.29848	3.76595	4.88459	4.55368	3.74892	3.10664	3.79305	5.14245	4.60678	4.64	3.85331	4.00959	3.65557	3.55258	4.53114	3.52363	4	3.55258	3.95171	3.7455	3.44651	4.97031	3.29848	2.66293	2.83521	2.93721	4.64	4.40218	3.29848	2.36237	2.26274	3.10664	3.09011	1.93329	1.92666	1.50944	1.82428	1.36704
210	4.81065	5.72433	4.61511	4.65102	3.39411	4.30813	4.36715	4.80267	4.86621	4.04772	3.15569	3.45392	3.95818	4.97031	4.35247	3.85331	3.39411		5.31865	4.87409	5.30177	4.19981	4.15076	3.65557	3.2	4.30516	3.87319	4.32296	3.96141	3.93548	4.19981	3.50907	5.24107	3.55258	2.79886	2.79428	3.07766	4.30516	4.55368	3.86658	2.049	2.76203	3.23975	2.79428	2.13467	2.17624	1.82428	1.76	1.36704
220	5.4494	5.29694	4.83719	4.50848	3.71117	4.40218	4.44558	4.5845	4.70846	4.60678	3.01887	3.39034	4.42538	5.46113	4.50564	3.74892	2.98905		5.30177	4.96258	5.14245	4.1876	4.22412	3.89626	3.39411	4.30516	4.19981	4.07922	4.19981	4.36715	4.07922	3.69389	5.29936	3.74892	2.72	2.83521	3.57771	4.52548	4.75714	4.00959	1.95305	2.52982	3.2	2.93721	2.42124	2.4	1.44	2.10447	1.16482
230	5.46113	5.51014	4.88459	4.65102	3.84	4.55368	4.61511	5.02155	5.08488	4.35247	3.43535	3.49445	4.42538	5.95449	4.65927	3.73524	3.10664		5.28	4.93931	5.28969	4.42538	4.00959	4.16	3.52	4.29921	4.19981	4.53114	3.77614	4.65102	4.16	3.54175	4.79466	3.73524	2.66293	2.79428	3.43535	4.75714	4.81332	4.01278	2.02386	2.22279	3.10664	3.50907	2.13467	2.15258	1.67045	1.76	1.01193
240	5.12	5.46113	4.97031	4.72745	3.69389	4.85831	4.61511	4.50848	5.41406	4.70846	3.46133	3.84666	4.46282	5.90268	4.89506	3.73524	3.3409		4.96	5.1524	5.28969	4.54805	4.00959	4.25131	3.71117	4.52548	4.30516	4.53114	4.32296	4.72474	4.51699	3.89626	5.08236	3.96141	3.39411	2.98905	3.44651	4.98317	4.96258	3.86658	1.97909	2.97617	3.01887	3.21994	2.48387	2.27403	1.67045	1.72325	1.28
250	5.60914	5.46113	4.9419	4.5817	3.84	4.85831	4.70574	4.88459	5.67493	4.98317	3.23975	3.7455	4.65927	5.95449	5.18212	3.96141	3.3409		5.12999	5.7355	5.46113	4.4138	3.57771	4.04772	3.86988	4.1876	4.64	4.64	4.35247	4.36715	4.30813	3.93548	5.10498	3.84666	3.50907	3.3409	3.57771	4.87672	4.85831	3.95171	2.43705	2.30755	3.15569	2.93721	2.37857	2.03647	1.63169	1.93329	1.47513
260	6.08842	5.68169	5.7355	4.66476	4.1876	4.92894	5.0241	5.02155	5.79986	4.97031	3.79305	3.89626	4.89506	5.81749	5.47752	4.07294			5.60914	5.65685	5.83945	4.64	3.86988	4.50564	3.89297	4.32296	4.86621	4.4138	4.22412	4.72474	4.30813	3.50907	5.15984	3.96141	3.62745	3.3409	3.59555	5.32826	5.05964	4.37008	2.66293	2.4		3.43535	2.08	2.4	1.63169	1.51789	1.76
270	5.93943	6.03775	5.59771	5.08488	4.33184	5.08488	5.32586	5.36656	5.58856	4.82394	3.86658	4.04772	4.81332	5.87442	5.31865	4.1876			5.4494	5.41406	5.7109	4.64	4.37008	4.55368	4.23623	4.42538	4.75176	4.64	4.44846	4.9419	4.52831	3.72151	4.87409	4.53114	3.74892	4.30813	4.15384	5.4494	5.11249	4.66476	2.37857	2.79886		3.2946	2.17624	1.81019	1.57582	1.93329	1.44
280	5.76	5.76888	5.5171	5.08488	3.85331	5.08488	5.28242	5.46113	5.94589	5.14245	4.29325	4.19981	5.1225	6.17401	5.36656	4.07294			5.4494	5.54718	5.7109	4.97803	4.51699	4.61788	4.35247	4.65102	4.75714	4.64	4.61511	5.02155	4.66476	3.65557	5.02155	4.67299	3.74892	4.26933	4.07922	5.4494	5.263	4.66476	2.7247			3.43535	1.72325	2.4	1.57582	2.00479	1.51789
290	5.92864	5.95449	5.95449	5.11249	4.64	5.62736	5.68169	5.63645	6.1574	6.2482	4.01278	4.10112	4.85831	6.17401	5.63645	4.32296			5.63645	5.5725		5.09243	4.81332	4.77326	4.60678	4.44846	4.75176	4.53114	5.05964	5.22394	4.83719	4.04772	4.87409	4.44846	3.62745	3.89297	4.26933	5.1225	5.56561	4.93931	2.62419			3.15569	1.8659	2.62419	1.6	1.8659	1.63169
300	6.08842	6.17401	5.87442	5.23129	3.84	5.39748	5.76888	5.6	6.43988	6.63759	4.37008	3.95171	5.1648	6.03775	5.77996	4.19981			6.13241	6.02289		4.98317	4.66476	4.39345	4.30813	4.8	4.86621	4.75714	4.83719	5.15984	5.1225	4.04772	5.22394	4.42538	4.19981	4.05088	4.26933	5.24839	5.67493	4.72745	2.71529			3.36381	1.92666	2.93721	1.37637	2.049	1.78885
310	6.2482	6.75041	5.95449	5.05964	4.50564	5.36656	6.17401	5.7288	6.36993	5.7109	4.22412	4.45708	5.36418	6.394	5.93943	4.098			6.09892	6.02289		5.22394	4.51699	4.55087	4.37008	5.05964	5.09243	5.20922	4.80267	5.41406	5.41406	4.15384	4.79466	4.77326	4.32296	4.42538	4.5817	5.3761	5.88313	5.02155	2.60461			3.43535	2.15258	2.52982	1.50944	2.37857	1.31939
320	6.08842		5.81749	5.05964	4.32	5.52406	5.68169	5.95234	6.65492	5.86788	4.5817	4.30813	5.263	6.5678	6.11359				6.36993	6.37194		5.34745	4.72474	4.52548	4.37008	5.3761	5.65685	5.09243	5.10498	5.32586	5.19199	3.84666	5.1524	4.67299	4.61511	4.39345	4.68393	5.95234	5.82409	5.16976	2.60461			3.23975	1.81019	2.049	1.50944	2.049	1.36704
330	6.11359		6.09262	5.1648	4.05088	5.68169	5.99093	5.85915	6.87069	6.29107	4.43694	4.51699	5.36418	6.65877	5.92				6.68371	5.88748		5.43529	5.36656	4.82394	4.5845	5.3761	5.43529	5.31865	4.66476	5.79765	5.63645	4.04772		4.70574	4.61511	4.36715	4.49141	5.7288	5.86788	5.23129	2.62419			3.15163	2.03647	2.52982	1.6473	2.049	1.78885
340	6.4		5.65685	5.5171	4.17229		6.17401	5.90051	6.37194	6.4716	4.37008	4.10112	5.67493	6.4359	5.76				6.404	6.44981		5.5541	4.87409	5.15984	4.5817	5.50549	5.54487	5.43529	5.1524	5.7355	5.50549	4.10112		4.61511	4.52831	4.34659	4.65102	6.03775	6.24	5.58168	2.03647			3.57771	1.8659		1.73066	1.81019	1.78885
350	6.92636		5.81749	5.47284	4		6.31139	6.2482	6.5892	5.99733	4.5845	4.50848	5.61826	7.01267	6.2482				6.44186	6.56585		5.67493		5.15984	5.02155	5.50549	5.88313	5.43058	4.88459	5.59771	5.47284	4.05088		4.80267	4.61511	4.34659	4.81065	5.81749	6.30327	5.29694	2.27403			3.36381	2.03647		1.57582	2.08615	1.87275
360	6.73712		6.09262	5.43294	4.01278		6.37194	6.04834	6.37194	6.49726	4.72745	4.44558	5.67493	6.75041	6.59115				6.33972	6.56585		5.20922		5.18212	5.00879	5.76888	5.7711	5.43058	4.97031	5.95449	5.34745	4.05088		4.97031	4.74906	4.52548	4.98317	6.12405	6.44981	5.79765	2.15258			3.59555	2.08615		1.36704	1.82428	1.82428
370	7.05635		6.31139	5.58856	4.1876		6.66837	6.45774	6.72952	6.1574	4.66476	4.30813	5.31865	6.97057	6.92636				6.44186	6.45774		5.43529		5.00112	5.08236	6.08211	5.99733	5.54487		5.81749	5.67493	4.20894		5.32586	5.10498	4.82394	4.82394	6.31139	6.74472	5.65685	2.27403			3.21994	1.93329		1.67045	2.37857	1.47513
380	6.75041		6.44981	5.39748	4.0287		6.87069	6.68371	6.44981	6.44981	5.65459	4.72474	5.46816	7.02544	6.4716				6.6818	5.99733		5.90051		5.47752	5.24107	5.85915	5.88313	5.7711		6.25843	5.77996	4.1876		5.5171	5.15984	4.82394	4.97031	6.394	6.74472	5.65685	2.17624				2.08		1.78885	1.92666	1.94648
390	7.05635		6.44981	5.43294	4.48		6.87069	6.45774	6.53067	6.87069	5.44235	4.65102		6.88744	6.59115				6.9319	6.33972				5.31865	5.02155	5.50549		5.54487			5.77996	4.50564		5.32586	5.15984	5.12999			6.87255	5.65685	2.08615				2.08615		1.94648	1.92666	1.63169
400	7.05635			4.92894	4.20894		6.80706	6.56585			5.76888	4.39345		7.05635	6.6086				6.62987					5.46113	5.32586	5.90268		5.99733			5.90051	4.81065		5.68169	5.22394	5.44			6.80706	5.65685	2.44229				1.95305		1.94648	2.15258	1.57582
410	7.22839			5.20922	4.07922		7.10695	6.33972			5.58856	4.66476			6.4716				6.59697					5.62053	5.41406	5.59771					5.99733	4.97031		5.68169	5.22394	5.60914			6.1574	5.72433	2.17624				2.17624		2.22854	1.92666	1.63169
420	7.06903			5.20922	4.34659		7.46362	6.792			5.72433	4.74906			6.94665				7.39816					5.77996	5.5171	6.03775					5.88748	5.14245		5.81749	5.58168				6.89301	5.51014	2.44229				1.95305		2.29085	2.27403	1.6
430	6.52871			5.39748	3.84		6.88744	6.9097			5.02155	4.9419			6.81269									6.25843	5.37848	6.12405					6.11359	5.28969		6.23179	5.58168				7.04182	5.86788	2.5044				1.8659		2.36237	2.17624	1.47513
440	6.32961				4.07922		7.02544	6.88186			5.46816	4.80267			6.84082									6.09892	5.68169	5.95449					6.59697	5.28969		5.93943	5.44					5.93943	2.72				1.78885		2.14662	1.95305
450	7.10155				4.01278		7.16436	6.7523			5.46816	4.86621			7.0636									5.93943	5.68169	5.59771					6.33972	5.14245			5.65685					6.01438	2.75274				1.95305		1.93329	2.03647
460	6.9889				3.64856		7.16436					4.86621			7.0636									5.93943	5.81749	5.87442					6.59697	4.97031			5.36656					6.09262	2.60461				2.049		2.48387	2.15258
470					4.04772		7.37043					4.87409			7.41199									6.75041	6.04834	6.17401					6.22357	5.63645			5.7355					6.23179	2.7247				2.17624		2.37857	2.03647
480					4.07922		7.72818								7.29712									6.89672	5.95234	6.23179					6.57754	5.4494			5.58856					5.87442	2.52982				2.60461		2.13467	1.82428
490					4.22412		7.51319								7.34084									6.9097	6.17608	6.513						5.60914			5.86788					6.03775	2.26274				2.37857		2.17624
500					4.50848		7.65663								7.34084									6.9097	5.92216	6.29717						5.97381			6.03139					6.47951	2.37857				1.70082		2.02386
510					4.83719		7.96312								7.34084									7.04727	5.90051							5.93943			6.53654					6.03775	2.62419				1.92666		2.10447
520					4.88459		8.11123								7.13571									6.88744	6.45774							5.77996			6.47951						2.7247				1.95305		2.44753
530					4.83719		7.96312																	6.72762	6.33972							5.99733			6.30327						2.7247				2.27403		2.10447
540					5.1225		8.05263																	7.68	6.56585							5.86788			6.53654						2.66293						2.29085
550					5.6		7.9438																	7.36695	6.45774							6.15532									2.4						2.29085
560																																									2.66293						2.13467
570																																									2.88444						2.17624
580																																									2.62419						2.08
590																																									3.10664						1.6473
600																																									3.01887						2.22279
610																																									2.97617						2.17624
620																																									2.93721						2.36237
630																																									2.86217						2.22854
640																																									2.86217						2.08
650																																									2.94156						1.8659
660																																									2.86217						2.22279
670																																									3.15163						2.00479
680																																									2.88444						1.95305
690
700
710
720
730
740
750
760
770
780
790
800
810
820
830
840
850
860
870
880
890
900
910
920
930
940
950
960
970
980
990
1000
1010
1020
1030
1040
1050
1060
1070
1080
1090
1100
1110
1120
1130
1140
1150
1160
1170
1180
1190
1200
1210
Figure 3C - Bundlle growth velocity (µm/min) in cut7-24										Figure 3D - Maximum bundle length (µm) in cut7-24										Figure 3F - Bundle growth velocity (µm/min) in sad1-1							Figure 3G - Maximum bundle length (µm) in sad1-1
cut7-24	cut7-24 klp9Δ	cut7-24 klp9Off	cut7-24 ase1Δ	cut7-24 mal3Δ	cut7-24 dis1Δ	cut7-24 alp14Δ	cut7-24 alp7Δ			cut7-24	cut7-24 klp9Δ	cut7-24 klp9Off	cut7-24 ase1Δ	cut7-24 mal3Δ	cut7-24 dis1Δ	cut7-24 alp14Δ	cut7-24 alp7Δ			sad1-1	sad1-1 klp9Δ	sad1-1 dis1Δ	sad1-1 cut7Δpkl1Δ	sad1-1 pkl1Δ			sad1-1	sad1-1 klp9Δ	sad1-1 dis1Δ	sad1-1 cut7Δpkl1Δ	sad1-1 pkl1Δ
0.614237	0.029054	0.01128	0.711626	0.383665	0.119156	0.676211	0.466198			6.97057	2.57992	2.27403	5.78218	5.6	3.32938	4.5817	6.22357			0.775106	0.267034	0.474444	0.864005	0.391917			3.50907	3.73524	2.94156	5.11249	5.34026
0.595158	0.033038	0.102401	0.594198	0.694694	0.207281	0.373948	0.26607			7.87096	2.049	3.32938	4.75714	6.44981	2.58488	5.44	4.64			0.394846	0.146698	0.297563	0.784917	0.788136			8.2365	2.049	3.64856	8.0399	6.80329
0.64922	0.083218	0.153053	1.34052	0.706448	0.100113	0.657796	0.386889			6.2482	2.32964	3.0568	3.51272	7.08531	2.26274	7.22839	5.5171			0.973079	0.105901	0.608817	0.710727	0.87858			6.2482	1.8659	3.39034	7.28659	7.24431
0.543982	0.022462	0.15165	0.607684	0.704687	0.473393	0.360942	0.442201			6.24	2.37857	2.64847	2.5044	6.18023	2.63879	5.31865	4.36715			0.624978	0.160464	0.445951	0.51676	0.507726			6.08211	1.82428	3.9061	5.43294	5.49851
0.739224	0.057976	0.089486	0.623153	0.537948	0.656639	0.502526	0.653004			4.83719	2.26274	4.15076	5.97809	5.02155	3.42415	5.81749	3.23975			0.855067	0.211663	0.560616	0.919191	0.917044			4.97031	2.49928	4.65927	7.25667	7.23547
0.636845	0.104083	0.256781	0.757893	0.361456	0.144018	0.332732	0.510254			5.39748	3.00613	2.44753	5.1524	4.85831	3.40165	8.43367	7.01815			0.54625	0.096138	0.167913	0.778601	0.540694			7.58947	2.29085	2.88	5.88313	5.52406
0.59755	0.028317	0.010399	0.213832	0.536235	0.191503	0.534223	0.490077			4.4138	3.15163	2.15258	2.37857	4.98317	2.95025	7.69332	5.63645			0.967312	0.200797	0.28651	0.627102	0.727416			5.41406	2.73876	3.64856	5.6	8.4437
0.884821	0.17266	0.410312	0.643309	0.620734	0.276157	0.506379	0.343417			7.22839	2.32964	2.73876	6.42595	7.2	4.08862	6.27273	4.19981			0.579872	0.028046	0.007887	0.777033	0.940135			5.51014	2.10447	4.01278	5.79545	5.67041
0.949924	0.170054	0.078498	0.843545	0.706924	0.065504	0.345797	0.321246			6.75041	3.15163	2.73876	3.07766	6.9319	2.79886	6.22357	4.68393			0.667741	0.170416	0.333857	0.641584	0.649668			3.96141	2.57992	4.19981	6.7523	7.03454
0.757733	0.064332	0.159401	0.690283	0.779789	0.43794	0.571657	0.492579			6.44981	2.97617	4.66476	2.91973	6.4716	3.0568	6.8352	4.66476			0.557858	0.171363	0.491687	0.786025	0.65011			7.38777	2.68209	4.42538	8.43156	6.56585
0.662996	0.081282	0.133831	0.741575	0.359063	0.237379	0.397459	0.395329			5.58856	3.23975	5.14245	3.89297	4.87672	3.59555	5.99733	6.12614			0.759394	0.06726	0.290333	0.596497	0.693644			8.06969	2.13467	3.2946	5.39748	8.16
0.864956	0.298297	0.189766	0.287885	0.585178	0.197305	0.460715	0.343838			6.21328	3.59555	3.09011	3.26337	7.48075	3.16784	4.52548	4.81332			0.755577	0.413468	0.220491	0.779354	0.719701			6.90229	2.03647	4.50848	8.61626	6.80329
0.500441	0.429768	0.238987	0.650283	0.576764	0.616907	0.194933	0.381898			5.68169	2.60461	2.27403	4.55087	4.48286	3.29848	5.29694	6.92636			0.445777	0.095071	0.328066	0.747609	0.570946			6.62408	2.48902	4.54805	6.22357	6.48346
0.80267	0.334509	0.108685	0.325788	0.743037	0.168694	0.450972	0.381127			8.2625	2.93721	4.90812	5.0241	7.40335	2.79428	6.15532	5.66138			0.7637	0.543361	0.305389	0.724933	0.887452			5.85915	2.95025	4.1876	4.64	7.14468
0.811167	0.014673	0.289641	0.777506	0.719335	0.1333	0.648273	0.424098			6.9097	2.48387	2.24	4.93931	7.73315	2.73408	7.87096	6.21328			0.573287	0.262126	0.37924	0.549464	0.758091			5.41406	2.93721	4.32296	6.2482	8.2365
0.738257	0.238111	0.218821	0.450291	0.512963	0.061958	0.988895	0.307051			6.87069	2.37857	3.3752	4.61788	7.02544	3.87319	8.29689	5.58856			0.530403	0.248958	0.581162	0.740316	1.01452			5.50549	2.49928	5.24107	7.32863	6.2482
1.01249	0.07136	0.015672	0.357707	0.682319	0.340289	0.474579	0.540269			6.87069	1.94648	2.26274	3.87319	6.25843	3.10664	4.50848	3.87319			0.444157	0.356098	0.198749	0.643455	0.732695			7.32688	3.43535	3.7455	6.36993	5.29694
0.773785	0.071774	0.646196	1.2704	0.957048	0.349601	0.611046	0.325462			5.76888	2.75274	3.18798	7.26372	7.58778	3.23975	7.18755	7.24077			0.834923	0.236442	0.190699	0.97159	0.982456			5.31865	3.43535	3.57771	4.81065	7.85468
0.591923	0.103373	0.027415	0.51377	0.729848	0.125039	0.350425	0.488533			4.9419	2.66293	1.8659	5.6	8.11123	3.2358	5.41406	6.7523			0.810123	0.187762	0.199662	0.759107	0.446425			7.2	2.14662	3.80316	7.18755	5.05205
0.418392	0.104875	0.379624	0.640509	0.555688	0.551019	0.411968	0.542547			5.67493	2.57992	2.30755	4.29921	6.37194	3.49445	7.28659	5.97381			0.716095	0.416537	0.355859	0.725205	0.397808			6.33972	4.30516	3.23975	7.69665	7.30414
0.826596	0.088928	0.016025	0.908674	0.76309	0.003736	0.670077	0.350316			7.05635	2.57992	3.85331	4.81332	3.65207	2.44229		5.90051			0.613483	0.213708	0.242447	0.702415	0.843122			7.5217	2.17624	2.95025	6.9097	7.52681
0.865283	0.17958	0.215043	0.747246	0.530774	0.319821		0.305423			7.41199	3.42415	4.16	3.73524	7.01815	2.76203		5.34026			0.623955	0.307829	0.299434	0.900535	0.529951			6.33568	2.27403	3.43535	6.79011	6.71619
0.677283	0.171106	0.049976	0.398138	0.583831	0.150953		0.616302			4.32296	2.44753	3.65207	5.68169	8.55215	3.26337		5.1225			0.709687	0.358342	0.37119	0.712036	0.66933			5.97381	2.52982	4.5817	6.8483	7.89369
0.528899	0.085174	0.086717	0.740672	0.491119	0.122575		1.09138			3.39411	3.81659	1.94648	5.90051	6.44981	3.07766		4.39345			0.678958	0.195886	0.43412	0.704237	1.00833			6.65877	3.42041	4.52831	6.87255	5.5725
0.323438	0.307832	0.225168	0.366744	0.812268	0.075287		0.371052			3.86658	2.14662	2.29085	5.23129	6.3053	3.44651		3.64856			0.70243	0.17253	0.082856	0.740884	0.702857			6.31139	1.97909	2.42124	5.39748	7.29712
0.925633	0.160268	0.124451	0.124421	0.411569	0.239203					7.39816	1.8659	3.0568	3.15163	6.3053	3.3752					0.748287	0.382815	0.153856	1.26473	0.651959			6.27273	2.84872	2.79428	6.9889	7.15005
0.836616	0.007912	0.090844	0.73459	0.714278	0.179247					6.56585	3.55258	2.44753	5.11249	6.43988	3.23975					0.549771	0.269583	0.111154	0.629534	0.735484			6.51497	2.7247	2.08615	3.87319	6.99806
0.874692	0.021529	0.006875	0.563249	0.529934	0.018237					5.83945	2.71529	3.93548	4.88459	6.97607	6.2482					0.589286	0.110275	0.340904	0.768334	0.829552			4.50564	4.15384	2.17624	7.28659	6.62987
0.902716	0.269787	0.02005	1.1358	0.475288	0.507633					6.33972	2.14662	2.97617	6.24	6.18023	2.88444					0.41347	0.131941	0.547789	0.672248	0.842348			8.49207	3.59555	2.95025	6.33972	6.37194
0.828025	0.139897	0.492956	0.691952	0.360605	0.245234					5.5171	2.63879	2.75274	4.17229	6.9097	4.67299					0.760172	0.435222	0.105467	0.878321	0.824701			5.93943	3.79305	4.22715	7.01815	6.27477
0.692232	0.116821	0.067144	0.483438	0.629469	0.305067					4.30516	2.72	3.18798	4.51699	7.53191	3.21596					0.73483	0.165428	0.200978	0.823224	0.693021			5.27757	2.93721	3.55258	6.82208	6.21328
0.366603	0.413037	0.273131	0.83882	0.617815	0.498189					5.83945	3.17591	3.86988	7.24077	5.1524	3.79305					0.451636	0.249722	0.102211	0.777128				6.56195	2.73876	4.26033	7.01267
0.865285	0.099777	0.118503	0.68095	0.855043	0.357034					6.68371		2.88444	3.50907	8.43156	3.29848					0.554324	0.400453	0.044824	0.88504				8.75333	2.22279	4.50564	6.9097
0.929374	0.126436	0.139074	0.592682	0.51363	0.073977					6.33972		3.92245	6.92266	7.80728	2.48387					0.821416	0.248393	0.188838	0.81823				5.05205	2.22854	3.76595	8.24737
1.06426		0.152911	0.278974	0.584065	0.445009					3.95818		2.57992	4.84248	5.65685	2.79428					0.38194	0.318109	0.238464	1.02007				9.6346	2.52982	5.44	5.43529
0.199437		0.166087	0.669516	0.427799	0.155248					3.32938		3.85331	4.30813	8.22873	2.98905					1.18433	0.253065	0.472551	1.01136					1.78885	4.84248	8.2365
0.33769		0.319258	0.57286	0.446825	0.267245					5.46816		3.45392	4.4138	7.76124	2.73408						0.254989	0.380865	0.741144					1.78885	3.3752	7.25667
0.7661		0.190709	0.230149	0.685267	0.681943					5.72433		3.62745	4.01278	5.69744	2.97617						0.3539	0.303163	0.288443					3.54175	4.46282	4.50564
0.745818		0.044845	0.3614	0.614592	0.308427					6.5678		3.23975	3.39411	4.81065	3.2						0.232248	0.208914						2.4	4.84248
0.685535		0.307729	0.573334	0.444622	0.33645					5.4494		3.85331	5.08488	4	3.09011						0.138498	0.280385						2.60461	4.96774
0.504409		0.475838	0.656914	0.625691	0.12667					6.27273			4.26033	6.12614	3.53452						0.43822	0.541436						3.15163	3.23975
0.628105		0.353536	0.749247	0.497023	0.319534					6.394			5.05964	4.89506	2.58488						0.097057	0.245455						2.95025	4.68393
0.688982		0.205783	0.996921	0.607505	0.173119					7.32863			4.86621	6.62408	2.29085						0.181698	0.392872						1.6	3.69389
0.861779		0.291461	0.570083	0.726909	0.238089					6.52871			5.05964	5.5171	3.10664						0.206805	0.749917						2.89772	2.68209
0.517537			0.703694	0.443488	0.202309					5.49851			2.83069	8.44824	3.0568						0.301023	0.48268						2.83069	3.0568
0.592979			0.254476	0.761595	0.187652					5.63645			4.50564	6.25843	3.69389						0.373992	0.209821						2.43705	3.89297
0.857499			0.34184	0.575282	0.56822					5.44			4.33184	5.16976	3.65557						0.442578	0.616138							3.10664
0.596878			0.788918	0.605668	0.054784					5.87442			4.22715	5.5541	4.32296						0.01645	0.350322							4.37008
1.00799			0.42582	0.506352	0.278178					6.7219			4	5.60914	3.95171						0.202672	0.182403							3.74892
0.89594			0.617908	0.525697	0.500021					6.68371			2.88444	7.88071	2.57992						0.306429	0.299663							4.79466
0.875504			0.70931	0.571133	0.470403					5.47752			3.01887	5.1524	3.18798						0.145137	0.347347							4.81332
0.606974			0.820649	0.543804	0.299273					4.53114			5.39748	6.12405	4.26933							0.345326							4.30813
0.612823			0.509894	0.503367	0.197529					4.97031			5.0241	4.17229	4.44558							0.626888							2.86217
0.569303			0.647117	0.468434	0.23298					5.5725				8.02556	3.17591							0.361006
0.704158			0.308147	0.71206	0.086998					6.8483				7.39643	3.77614							0.197426
0.609894				0.732993	0.128622					5.69744				4.16	2.72							0.49497
0.879597				0.506597	0.165556					6.30327				5.95234	2.75274							0.291787
1.03942				0.542598	0.204573					6.8352				4.33184	3.65207							0.535101
0.845396				0.774506	0.404561					5.63645				8.0016	3.84666							0.135273
0.709827				0.508114	0.1613					5.90051				7.84653	3.43535
0.803427				0.737948	0.182524					5.36656				7.9438	3.45392
0.864327				0.641184	0.224809					7.68				6.52871	2.60461
0.659252				0.629904	0.208797					6.68371				6.71619	3.52
0.548042				0.592111	0.40261					6.513				6.287	2.37857
0.707315				0.488309	0.340368					5.99733				7.89369	3.10664
0.839794				0.671974	0.475386					5.99733				7.38777	2.44229
0.718381				0.63467	0.314293					5.1524				7.18755	2.27403
0.744884				0.649923						6.25843				5.22394	3.92245
0.827642				0.83823	0.113847					6.59697				7.39643	3.86988
0.705645				0.60278	0.48404					7.49442				4.22412	3.60976
1.23895				0.671218	0.796433					5.29936				3.80316	3.95818
0.613152				0.283759	0.146521					6.23179				5.94589	2.95025
0.679773				0.554354	0.136022					6.53654				6.88	3.57771
0.646085				0.542255	0.631999					5.60914				7.31289	3.50907
0.780012				0.443261						4.98317				7.29712	2.52982
0.850473				0.522222	0.130537					6.394				6.35182	3.93548
0.888213				0.685385	0.347969					7.04182				6.62987	3.3752
0.655305				0.739907	0.244488					6.47951				9.15222
0.569933				0.604788	0.430744					6.82208				6.00586
0.832383				0.537225	0.166724					6.13241				5.08236
0.699218				0.496587	0.304407					6.45774				4.65102
0.443298				0.466734	0.329084					5.50549				8.01439
0.803371				0.714243	0.110317					6.7523				5.77996
0.677316				0.684129	0.236764					6.9319				6.792
0.859693				0.664324	0.219978					6.94665				6.8352
0.393234				0.683848						6.68371				5.7711
				0.602226						5.43529				7.08531
				0.664784										5.74442
				0.453588
Figure 3H - Bundle length (µm) as a function of time in sad1-1
time (sec)	sad1-1																																							sad1-1 cut7Δpkl1Δ
0	1.13137	1.16482	1.47513	1.82428	1.28996	1.35764	1.8659	1.15378	1.70082	1.21852	1.28996	1.16482	1.07331	1.72325	0.8	1.15378	1.16482	1.0245	1.21852	0.905097	1.72325	1.37637	0.861626	1.43108	2.75274	1.01193	1.0245	1.37637	1.24964	0.8	1.58392	1.21852	1.28	1.0245	1.12	1.0245	1.0245	1.50944	0.715542	1.07331	1.07331	1.16482	1.47513	1.15378	1.01193	1.15378	0.932952	1.12	1.6
10	1.57582	1.43108	2.15258	2.4	1.93329	1.47513	2.36237	1.37637	2.15258	1.47513	1.73066	1.93329	1.28996	2.29085	1.28996	1.6473	1.82428	1.6	1.47513	1.51789	1.87275	1.70082	1.37637	1.78885	3.10664	1.28996	1.31939	1.47513	1.58392	1.28	1.81019	1.21852	1.51789	1.24964	1.47513	1.13137	1.47513	1.72325	1.47513	1.6473	1.50944	1.47513	1.94648	1.37637	1.28	1.43108	1.24964	1.21852	2.08
20	1.37637	1.44	2.17624	2.7247	2.29085	2.17624	2.36237	1.57582	2.17624	1.37637	1.70082	2.02386	1.36704	2.24	1.28996	1.72325	1.82428	1.6	1.51789	1.28996	2.64847	1.72325	1.73066	1.78885	3.0735	1.82428	1.31939	1.95305	2.03647	1.37637	1.81019	1.78885	1.15378	1.07331	1.63169	1.37637	2.049	2.13467	2.03647	1.82428	2.02386	1.76	1.63169	1.73066	1.57582	1.50944	1.47513	1.57582	2.10447
30	1.28996	1.78885	2.27403	2.83069	2.43705	2.4	2.57992	2.00479	2.26274	2.049	1.92666	1.97909	1.31939	2.24	1.6	2.02386	2.37857	1.82428	1.94648	1.67045	2.72	1.47513	1.70082	1.95305	3.68348	1.72325	1.72325	1.95305	2.15258	1.70082	2.15258	1.63169	1.57582	1.35764	1.44	1.15378	2.15258	1.93329	2.71529	2.02386	2.08	1.94648	2.10447	1.8659	1.31939	2.03647	1.58392	1.94648	2.10447
40	1.50944	1.57582	2.37857	2.84872	2.37857	2.60461	2.52982	2.14662	2.049	1.73066	2.27403	1.82428	1.36704	2.29085	1.6	2.02386	1.94648	1.95305	1.76	1.73066	2.84872	1.47513	1.92666	2.17624	3.74892	1.94648	1.82428	1.82428	1.70082	1.50944	1.70082	1.78885	1.76	1.28996	1.72325	1.28996	2.48902	2.29085	2.4	2.4	2.37857	1.87275	2.10447	2.22279	1.82428	2.08615	1.70082	2.10447	2.42124
50	1.78885	1.78885	2.4	3.21994	2.73408	2.97617	2.36237	2.049	2.37857	1.95305	2.26274	2.29085	1.51789	2.88444	1.57582	2.08615	1.94648	1.8659	2.10447	1.93329	2.88444	1.28996	1.8659	1.92666	3.55258	1.97909	1.57582	2.08615	2.15258	1.78885	2.049	1.82428	1.57582	1.01193	1.82428	1.6	2.49928	2.63879	3.29848	2.48387	2.5044	1.67045	2.17624	2.44229	1.78885	2.79428	1.82428	2.72	2.57992
60	1.58392	1.6473	2.60461	3.23975	2.94156	2.97617	2.44229	2.15258	1.81019	2.14662	2.49928	2.08615	1.36704	2.88444	1.78885	2.08	2.08	2.08615	2.08	2.22279	2.97617	1.67045	2.049	2.22279	3.97432	1.97909	1.67045	1.8659	2.22279	1.95305	2.22279	1.63169	1.82428	1.51789	1.78885	1.50944	2.62419	2.68209	4.03822	2.63879	2.86217	1.78885	2.4	2.79886	1.67045	2.88444	1.92666	2.76203	2.57992
70	1.47513	1.73066	2.84872	3.29848	3.23975	3.32938	2.36237	2.37857	1.70082	2.049	2.73408	1.93329	1.63169	2.86217	1.63169	2.10447	2.17624	2.03647	2.17624	2.52982	3.2946	1.94648	2.17624	2.049	3.9061	1.94648	1.67045	1.92666	2.14662	2.17624	1.95305	1.87275	2.10447	1.6	1.94648	1.43108	2.84872	2.88444	4.22412	2.95025	2.66293	1.95305	2.4	2.86217	1.78885	2.88444	1.81019	2.91973	2.73876
80	1.70082	1.6473	3.2	3.43535	3.3752	3.0735	2.48387	2.48902	2.17624	2.22279	2.79428	2.17624	1.57582	2.86217	1.6	2.4	2.4	2.15258	2.08	2.049	2.93721	1.94648	2.43705	1.95305	4.30516	2.4	2.17624	2.049	2.36237	2.17624	2.17624	1.6	2.17624	1.58392	2.26274	1.78885	2.7247	2.86217	4.57611	3.10664	2.66293	1.8659	2.76203	3.2946	1.87275	3.39034	1.81019	3.2358	2.4
90	1.92666	1.70082	3.28293	3.29848	3.46133	3.46133	2.73876	2.83069	2.27403	2.43705	3.00613	2.32964	1.73066	3.39034	1.94648	2.26274	2.56	2.17624	2.5044	2.22279	2.97617	1.94648	2.36237	2.17624	4.19981	2.44753	2.10447	2.03647	2.37857	2.62419	2.48387	1.63169	2.17624	2.27403	2.13467	1.6	2.49928	3.18798	4.48286	3.57771	2.75274	1.6473	2.89772	3.21994	1.94648	3.49445	1.95305	3.26337	2.63879
100	2.00479	1.70082	3.0568	3.09011	3.23975	3.86988	2.89772	2.7247	2.15258	2.22854	2.79428	2.08615	1.72325	3.10664	2.08	2.17624	2.68209	2.30755	2.36237	2.08615	3.0735	2.29085	2.08615	2.08615	4.52548	2.60461	2.24	2.37857	2.58488	2.57992	2.08	1.92	2.43705	2.4	2.44753	1.73066	3.0568	2.94156	5.32586	3.3752	2.83069	2.00479	3.04	3.59555	2.42124	3.39034	2.08615	3.80316	2.89772
110	2.08615	1.43108	3.28293	3.23975	3.46133	2.84872	3.21596	2.83069	2.08615	2.43705	2.91973	2.4	2.14662	3.01887	2.13467	2.43705	2.29085	2.52982	2.36237	2.22279	3.29848	1.92	2.52982	2.22279	4.86621	2.56	2.42124	2.15258	2.32964	2.97617	2.02386	1.6	2.88444	2.17624	2.48387	1.58392	3.29848	2.93721	5.7288	3.73524	2.7247	1.73066	3.21596	3.39034	2.60461	3.57771	2.36237	3.50907	2.52982
120	1.73066	2.14662	3.29848	3.49445	3.51272	3.2946	3.21596	3.10664	2.4	2.36237	2.63879	2.15258	2.58488	3.10664	2.13467	2.22854	2.89772	2.60461	2.73408	2.48902	3.64856	1.82428	2.43705	2.00479	4.52548	2.26274	2.60461	2.7247	2.79428	2.95025	2.29085	2.02386	2.79428	2.75274	2.22279	1.70082	3.50907	3.00613	5.82409	3.95818	2.97617	1.92666	3.21596	3.60976	2.57992	3.89297	2.22854	3.59555	2.88
130	1.92666	2.17624	3.73524	3.71117	3.55258	3.3752	3.3752	3.10664	2.84872	2.5044	2.83521	2.60461	2.73408	3.15569	2.17624	2.63879	2.95025	2.97617	2.66293	2.37857	3.68348	2.24	2.5044	2.03647	4.75714	3.0568	2.63879	2.49928	2.63879	2.97617	2.29085	2.10447	3.29848	3.15569	2.29085	1.87275	3.62745	3.00613	6.04834	3.84666	3.55258	1.82428	3.3752	3.92245	2.57992	4.05088	2.58488	3.76595	3.0568
140	2.22279	1.87275	3.77614	3.52	4.00959	3.59555	3.71117	3.29848	2.79886	2.66293	3.09011	2.97617	2.64847	3.15569	2.37857	2.22854	2.79428	2.71529	2.57992	2.44229	3.55258	2.60461	2.44229	1.95305	4.64	2.88	2.83521	2.7247	2.79428	2.88444	2.76203	2.60461	3.3409	3.3752	2.14662	1.82428	3.74892	2.79428	5.63645	3.89626	3.51272	2.22279	3.68	4.20894	2.89772	4.33184	2.88444	3.92245	3.0568
150	2.44229	1.82428	3.84666	3.57771	4.00959	3.51272	4.0287	2.5044	2.57992	2.57992	2.88444	2.66293	2.64847	3.2946	2.5044	2.63879	2.83521	3.29848	2.79886	2.4	3.81659	2.79428	2.88444	2.15258	5.09243	2.89772	3.18798	2.95025	3.0568	3.3752	2.79428	2.13467	3.44651	3.42415	2.30755	1.95305	3.96141	2.66293	6.12405	3.89626	3.80316	2.36237	3.04	3.92245	2.83521	3.3752	2.88444	4.04772	2.42124
160	2.57992	2.29085	3.84666	3.95818	4.39345	3.57771	3.86988	3.42415	3.23975	2.52982	2.79428	2.86217	2.64847	3.51272	2.86217	2.57992	3.10664	3.0568	3.10664	2.79886	4.30813	2.79428	3.17591	2.37857	5.20431	3.21596	3.3409	3.29848	2.79428	3.0735	2.88444	2.43705	3.65207	3.64856	2.22279	1.95305	4.35247	2.88444	5.76888	3.84666	4.01278	2.30755	3.85331	4.55087	3.1435	3.2	2.79428	4.30813	3.73524
170	3.07766	2.29085	4.29921	3.95171	4.43694	3.73181	4.39345	3.32938	3.10664	2.88444	2.66293	2.79428	2.93721	3.46133	2.72	2.30755	2.89772	3.29848	3.2946	2.7247	4	2.79428	2.60461	1.95305	5.54487	3.42041	2.60461	3.29848	3.2358	3.46133	2.68209	2.29085	3.65207	3.2946	2.08615	2.14662	4.19981	3.09011	6.17401	4.55368	4.25131	2.22854	3.39411	4.52548	3.49445	3.36	3.3409	4.22412	3.39411
180	3.15163	2.22279	4.07922	4.19981	4.5845	3.68348	4.73827	3.2946	3.23975	2.83521	2.95025	3.03579	2.93721	3.86988	3.10664	2.52982	2.95025	3.0735	3.46133	2.62419	4.66476	3.3409	2.97617	2.049	5.31865	3.76595	2.98905	3.23975	3.29848	3.81659	3.03579	2.36237	4.17229	4.03822	2.37857	1.8659	4.32296	2.5044	6.12405	4.50564	4.04772	2.43705	3.53452	4.68393	3.54175	3.2	3.49445	4.22412	3.29848
190	2.98905	1.97909	4.42538	5.02155	4.43694	3.55258	4.46282	3.51272	3.23975	2.68209	3.10664	3.29848	3.07766	3.59555	3.2946	2.14662	3.10664	3.3752	3.42415	2.62419	4.66476	3.45392	3.51272	2.26274	5.43529	3.92245	3.03579	3.32938	3.54175	3.95171	3.03579	2.44229	3.95171	4.30813	2.62419	1.78885	4.83719	2.72	6.34577	4.65927	4.30813	2.44229	3.53452	4.66476	3.54175	3.53452	3.64856	4.36715	3.29848
200	3.44651	2.37857	4.30516	4.55368	4.44558	3.87319	4.84248	3.77614	3.59555	3.1435	3.52363	3.36	3.21994	4.07922	3.29848	2.22279	3.29848	3.65557	3.59555	2.62419	5.08236	3.64856	3.15569	2.26274	5.43058	3.60976	3.80316	3.2946	3.23975	4.30813	3.44651	2.75274	4.15076	4.5845	2.7247	2.37857	4.99856	2.98905	6.17401	4.50564	4.26933	2.64847	3.85331	4.82394	3.57771	4.01278	3.69389	4.5845	3.69389
210	3.7455	2.37857	4.64	4.87409	5.1524	4.22412	4.73827	3.68348	3.2946	3.29848	3.62039	3.39411	3.23975	4.07922	3.29848	2.10447	2.94156	3.68348	3.59555	3.0735	5.29936	3.89297	3.50907	2.48902	5.7711	3.69389	3.69389	3.81659	3.73181	4.17229	3.45392	2.93721	4.61511	4.07922	2.83069	2.10447	5.19199	3.39034	6.97057	4.60678	4.35247	2.86217	3.69389	4.82394	3.72151	4.1876	4	4.50848	3.80316
220	3.49445	2.5044	5.1225	5.51014	5.08236	3.46133	4.92894	3.86988	3.93548	3.45392	3.62039	3.64856	2.79428	3.79305	3.2	2.26274	3.21994	3.74892	3.95171	2.75274	5.24107	4.05088	3.50907	2.27403	5.65685	4.25131	3.80316	3.95171	4.15076	4	3.69389	3.15163	4.17229	4.5817	2.88444	2.42124	5.10498	3.36381	6.61441	4.81332	4.46282	3.00613	3.85331	4.98317	4.43694	4.01278	3.92245	4.86621	4.15384
230	3.7455	2.94156	5.1225	5.52637	5.00879	4.12912	5.31865	3.86988	3.65207	3.42041	3.64856	3.60976	3.2	3.51272	3.52363	2.17624	3.39034	3.72151	3.86988	2.97617	5.29936	4.1876	3.86658	2.60461	5.43529	4.01278	3.84666	4.00959	4.22715	3.9061	3.64856	3.15163	4.52831	4.50848	2.95025	2.56	5.41406	3.18798	6.3053	5.11249	4.5817	3.15163	3.86988	4.82394	4.86621	4.49141	4.05088	5.36656	3.86658
240	3.89626	2.73408	4.8	5.79765	5.37848	3.9061	5.5541	3.43535	3.32938	3.69389	3.28293	3.60976	2.79886	3.86658	3.62745	2.37857	3.29848	3.93548	3.73181	3.10664	5.10498	4.5817	4.01278	2.49928	5.88748	4.5817	4.11359	4.15076	4.43694	4.098	3.49445	3.3409	4.97031	4.65102	2.88444	2.76203	5.59771	3.3409	6.3053	4.81332	4.52548	3.36381	4.0287	5.46113	4.87409	4.1876	4.26933	4.74906	4.55368
250	4.46282	3.09011	4.97031	6.01225	4.72474	3.97432	5.31865	3.73181	3.51272	3.3409	3.62745	3.57771	2.93721	3.86658	3.73524	2.42124	3.50907	4.07922	4.26033	3.23975	5.24107	4.39345	4.37008	2.4	5.79765	4.44558	4.15384	3.81659	4.50848	3.97432	3.69389	3.23975	4.8	4.50848	3.2	2.57992	6.09262	3.69389	6.79011	4.96258	4.89506	3.54175	4.1876	5.12999	5.52637	4.97031	4.61788	5.10498	4.60678
260	3.95818	3.09011	4.83719	6.01225	5.32586	4.30516	5.36418	4.01278	3.36381	3.60976	3.23975	3.95818	2.86217	3.80316	4.1876	2.22854	3.36381	4.52831	4.03822	3.01887	6.09262	4.68393	4.07922	2.4	6.33972	4.39345	4.30813	4.30813	4.72474	4.098	3.95818	3.49445	5.0241	4.9419	3.68348	2.79428	5.68169	3.49445	7.14468		5.36656	3.69389	4.23623	5.28969	5.08236	4.8	4.77326	5.19199	4.72745
270	3.95818	2.79428	4.67299	6.23179	5.24107	4.12912	5.31865	4.00959	3.21994	3.42041	3.46133	4.26933	2.79886	4.25131	4.29921	2.42124	3.2946	4.03822	4.17229	3.10664	5.7355	4.82394	4.42538	2.44229	6.2482	4.61511	4.11359	4.52831	5.24107	4.22412	4.04772	3.29848	5.1225	4.61511	3.65207	2.63879	5.81749	3.60976	7.01267		5.28969	3.59555	4.52548	5.52406	4.86621	4.81065	4.81332	5.37848	5.29694
280	4.07922	3.15163	5.05964	6.29717	5.32586	4.67299	4.77326	4.22715	3.43535	3.69389	3.59555	4.39345	3.15569	4.70574	4.64	2.72	3.86988	4.57611	4.17229	3.46133	5.95449	4.68393	4.89506	2.4	6.00586	4.098	4.23623	4.74906	5.05964	4.098	4.10112	3.39034	5.47284	4.74906	3.59555	2.60461	5.93943	4.15384	7.32863		4.98317	3.64856	4.20894	6.13241	5.02155	4.96	4.73827	5.19199	5.23129
290	4.46282	3.07766	5.1524	6.37194	5.59771	4.89767	4.70574	4.22412	3.73181	4.25131	3.55258	4.36715	2.93721	4.61788	4.1876	2.88	3.43535	4.35247	4.39345	3.32938	5.7355	4.81065	4.70846	2.44229	6.02289	4.74906	4.42538	5.3761	4.92894	4.4138	4.10112	3.39034	5.77996	5.28242	3.54175	2.72	6.23179	3.60976	7.23547		5.14245	3.7455	4.36715	5.81529	5.32586	4.49141	5.05205	5.46113	5.65685
300	5.1225	3.07766	5.0241	6.1574	5.54718	4.67299	5.21168	4.44558	3.57771	3.69389	3.9061	4.39345	2.52982	4.65927	4.44846	2.95025	4.03822	4.52831	4.39345	3.68348	6.23179	5.12999	5.15984	2.66293	5.92216	4.89767	4.30813	5.50549	4.97031	4.35247	4.51699	3.54175	5.69744	4.74906	3.69389	3.0568	5.7355	3.84666	8.29843		5.63645	3.7455	4.23623	6.13241	5.00879	5.6	4.55087	5.54718	5.15984
310	5.05205	3.36381	5.28242	6.29717	5.99093	5.0241	5.67041	4.5845	3.86988	3.89626	3.95171	4.26933	2.88444	4.46282	4.54805	3.2358	3.81659	4.36715	4.52831	3.9061	6.31139	5.14245	5.14245	2.79886	5.92216	4.64	4.70574	5.28242	5.54718	4.54805	4.16	3.29848	6.12614	5.28242	3.80316	2.91973	6.15532	4	8.03512		5.60914	4.10112	4.1876	6.4716	5.08488	4.8	5.08488	5.54718	5.58168
320	4.89506	3.2946	5.50549	6.43988	6.12405	5.0241	5.71762	4.5845	4.43694	3.95818	4.22715	4.84248		4.42538	4.35247	3.2358	3.81659	4.80267	4.61511	3.73181	6.61441	5.18212	5.31865	2.57992	7.15005	4.98317	4.81332	5.65685	5.32586	5.3761	4.45708	3.57771	6.47358	5.50549	3.7455	3.3409	5.81749	3.60976	8.96571		5.76888	4.11359	4.50564	6.78822	5.08236	5.28969	4.84248	5.82409	5.00879
330	4.89506	3.65207	5.3761	6.5892	6.08211	4.54805	5.67041	4.07922	4.43694	4.35247	4.00959	4.68393		4.77326	4.54805	3.42041	3.46133	5.08488	4.79466	4.03822	6.394	5.14245	4.66476	2.72	6.69902	5.20922	4.85831	5.68169	5.46113	4.92894	4.87409	3.42041	6.12614	5.28242	3.95171	3.69389	6.34577	3.76595	9.24822		6.11359	4.23623	4.66476	6.31341	5.29936	5.14245	5.60914	5.90268	5.51014
340	5.43294	3.57771	5.3761	6.37194	5.99093	4.77326	5.71762	4.51699	4.25131	4.55368	4.16	4.70846		4.46282	4.8	3.60976	3.81659	5.08488	5.15984	4.17229	6.8352	5.14245	5.18212	2.86217	6.92451	5.20431	5.36418	5.90268	5.46113	5.19199	4.93931	3.29848	6.44981	4.97031	3.49445	3.84666	6.61441	4.15384	9.28138		6.08842	4.39345	4.82394	6.65492	5.23129		5.46113	5.79765	5.79986
350	5.20922	3.79305	5.47284	6.31139	6.70092	5.34745	6.07157	4.66476	4.16		4.16	4.70846		4.55087	4.65102	3.50907	3.87319	4.79466	4.66476	3.9061	6.80706	5.12999	5.20922	3.07766	6.49726	4.65102	5.31865	5.90268	5.6	5.41406	4.93931	3.3752	6.56585	5.24107	3.7455	3.64856	6.21328	4.42538	9.50486		6.76745	4.5817	4.81065	5.99733	5.58168		5.47752	6.04834	6.08211
360	5.30177	3.86988	5.47284	6.44981	6.3053	5.0241	5.92	4.72474	3.95171		4.5817	4.5817		5.0241	4.8	4.04772	4	5.37848	4.86621	3.81659	6.75041	5.31865	5.79545	3.09011	7.04727	5.77996	5.36418	5.68169	5.54718	5.47284	5.16976	3.69389	6.33972	5.37848	4.07922	4	6.23179	4.86621	9.6346		6.56	5.05205	5.05205	6.4716	5.51014		5.49851	5.82409	5.59771
370	5.68169	3.55258	5.4494	6.09262	6.4359	4.75176	5.87006	4.79466	4.04772		4.22412	4.89506		4.70846	5.24839	4	4.26033	5.08488	5.15984	4.17229	7.32688	5.18212	5.65685	3.23975	6.7523	6.11359	5.01135	6.03775	5.95449	5.24839	5.02155	3.69389	6.44981	5.46113	4.10112	4.15384	7.02544	4.70846			6.5678	5.43294	5.20922	6.65492	5.51014		5.63645	5.92216	5.46113
380	5.49851	4.17229	5.5725	6.31139	6.394	5.32826	5.82409	4.72474	4.66476		4.5817	4.92894		5.18212	5.1524	3.95171	3.73524	5.1524	5.46113	4.26033	7.32688		5.65685	3.54175	7.27252	5.99733	5.41406	6.08211	6.17401	4.8	5.23129	4.01278	6.56195	5.68169	4.37008	4.50564	6.75041	4.07922			6.72762	4.86621	4.92894	6.15532	5.52637		5.79545	6.04834	5.58168
390	5.81529	4.39345	5.69744	6.31139	6.3053	4.99856	5.41406	4.86621	4.75714		4.25131	5.1225		5.18212	5.85915	3.93548	4.22412	5.00879	5.32586	4.17229			5.47752	2.98905	7.5217	6.33568	5.56561	5.85915	6.31139	4.98317	5.44235	4.01278	6.78822	5.24107	4.37008	4.66476	6.66837	4.5817			7.04727	5.36656	5.05205	6.59697	5.82409			6.37194	6.09262
400	5.7109		5.79765	6.23179	6.7523	5.28242	5.71762	5.08488	4.61788		4.5817	5.05205		5.36656	5.50549	4.29325	3.87319	5.23129	5.32586	4.61511			5.60914	2.79428		5.88748	5.67493	6.08211		5.28242	5.23129	4.1876	6.90229	5.93943	4.25131	4.72745	6.97057	5.05205			7.04	5.24107	5.00112	6.90785	5.52637			6.47358	6.394
410	5.97381		5.6	6.8352	6.65877	5.24839	6.02289	5.08488	4.65927		4.45708	4.89506		5.49851	5.6	4.30813	3.85331	5.65459	5.50549	4.70574			6.09892	3.44651		6.1094	5.76888	6.12405		5.34745	5.08488	4.50564	7.24077		4.35247	4.43694	7.02544	4.55087			7.21598	5.52406	4.86621	7.03454	5.88313			6.27273	6.97057
420	5.65685		6.02289	6.97057	6.4359	5.63645	6.07157	4.79466	4.40218			5.08488		5.34026	5.47284	4.44558	4.07922	5.58856	5.7288	4.61511			6.08842	3.60976			5.82409	6.3053		5.3761	5.36656	4.01278	7.46705		4.35247	4.72745	7.24431	4.65927			7.52681	5.36656	4.73827	7.0636	5.52637			6.3053	6.70092
430	6.31341		5.69744	6.70092	6.69902	5.05964	6.07157	5.16976	4.70574			4.92894		4.86621	5.47284	4.5817	4.07922	5.16976	5.63645	4.61511			5.92	3.76595			5.97381	6.47951		5.34745	5.58856	4.05088	7.46705		4.50564	4.5817	7.46362	4.86621			7.21598	5.86788	4.89506	7.10155	5.23129			6.27273	6.5678
440	6.13241		6.2482		6.8483	5.19199	6.12405	5.29694	4.92894			4.92894		5.34026	5.67493	5.19199	3.96141	5.36656	5.85915	4.66476			6.56	4			5.76888	6.5678		5.5541	5.79986	4.33184	7.36174		4.39345	4.79466	7.38257	5.0241			7.36695	5.7109	5.43294	7.25667	5.58168			6.7523	7.36695
450	6.29107		6.59697		6.82208	5.24839	6.22357	5.16976	5.1225			4.73827		5.49851	6.08211	4.80267	4.19981	5.67493	5.82409	4.52831			6.88744	4.15384			5.31865	6.21328		5.5725	5.58856		7.35478		4.5817	4.79466	7.95829	4.50564			7.68666	6.02501	4.89506	7.10155	5.79986			6.7523	7.49955
460	5.7109		6.2482		7.2	5.19199	5.92	5.08488	4.89506			4.42538		5.36656	5.85915	5.29936	4.4138	6.07157	6.02289	4.74906			6.57754	4.23623			5.58856	6.65877		5.5725	5.93943		7.58778		5.05205	5.1524	8.34458				7.5353	5.97381	5.1225		5.7355			6.3053	7.01267
470	6.1823		6.49726		7.48075	5.46113	6.17608	5.16976	5.36656			5.20922		5.52406	6.3053	5.10498	4.32296	6.02289	5.63645	4.70574			6.88744	4.46282			5.88313	6.49726		5.85915	6.01225		7.58778		5.05205	5.22394	8.17724				7.52681	5.99733	5.27757					6.65877	7.58947
480			5.95234		7.81383	5.90268	6.37596	5.23129	5.34026			4.89506		5.79545	6.08211	5.59771	4.86621	5.97381	5.69744	5.0241			7.04727	4.61788			5.79986	6.37194		5.50549	6.30327		7.92283		5.05205	5.46113	8.7343				7.5353	5.97381	5.36418						7.63319
490			6.17608		8.25978	5.90268	5.71762	5.46816	5.20922			4.92894		5.49851	6.3053	5.90268	4.86621	6.22357	6.147	5.28242			7.04727	4.77326			5.65459	6.47951		6.04834	6.51497		7.58778		5.08488	5.1524	8.75333				7.86608	6.13241	4.81332						7.72155
500			6.59697			5.68169	6.12405	5.67493	5.49851			4.92894		5.31865	5.82409	5.37848	4.52548	6.63759	6.147	5.3761			7.2	5.18212			5.58168	6.62408		6.21328	6.36993		8.14901		5.27757	5.0241					8.02556	6.31341	5.36418						8.12384
510			6.62408			5.90268	6.07157	5.67493	4.84248			5.01135		5.46113	5.99093	5.50549	4.19981	6.792	6.27273	5.1524				4.42538			5.97381			6.27273	6.1574		7.70662		5.08488	5.34745					8.02556	6.49726							8.21004
520			6.59697			6.21328	6.32961	5.52637				5.21168		5.15984	6.12405	5.95234	4.54805	6.90785	6.49726	5.05964				4.73827						6.04834	5.94589		8.03353		5.27757	5.47284					8.02556	6.62987							7.98879
530			7.36695			6.03775	6.37596	5.58856				4.96774		5.30177	6.34577	5.99093	4.8	7.0636	6.04834	5.3761				5.30177						6.08211	5.88313		7.9196		5.27757	5.5725					8.0399	6.78822							7.85468
540			7.55227			6.25843	6.58337	5.61826				4.85831		5.63645	6.47951	5.5171	4.52548	7.02908	6.08211	5.50549				5.46113							5.86788		8.49207			5.79765
550			6.92266			6.34577	6.43988					5.16976		5.77996	6.47951	5.7355	4.75714	7.0636	5.85915	5.32586				5.34026							6.01225		8.0399			6.02289
560			6.88186			6.34577	6.79765					4.93931		5.49851	5.99093	5.81749	4.98317							5.52406									8.38437			5.77996
570			7.01267			6.37194	6.5892					5.58168		6.13241		5.68169	5.1225							5.52406									8.0399			5.88748
580
590
600
610
620
630
640
650
660
670
680
690
700
[truncated: 235 more columns]
