# Supplementary material for: Kinesin-6 Klp9 orchestrates spindle elongation by regulating microtubule sliding and growth
Source: eLife. 2021 Jun 3;10:e67489. doi: 10.7554/eLife.67489 (PMC8205488; doi:10.7554/eLife.67489)
Supplement: Figure 4—source data 1. [file elife-67489-fig4-data1.xlsx]

## Sheet: Figure 4
Figure 4 A - Anaphase B spindle dynamics
Time (min)	wt																																			klp9Δ
0	2.17624	2.37857	2.5044	1.94648	2.37857	3.0568	2.73408	2.73408	1.73066	2.29085	2.44753	2.86217	2.26274	1.78885	3.07766	2.08615	2.22854	2.48902	2.32964	2.83521	2.89772	3.10664	2.4	2.7247	2.5044	2.79428	2.30755	2.24	2.72	2.57992	3.2	2.13467	2.75274	1.82428	2.22279	2.49928	3.21994	2.4	2.52982	2.57992	2.00479	2.57992	2.4	2.52982	2.4	2.64847	1.92	2.27403	2.86217
1	3.10664	3.77614	3.3409	3.01887	3.0568	4.26033	3.62745	3.69389	4.50848	2.72	3.57771	4.39345	2.94156	3.60976	5.43529	2.62419	3.15163	3.44651	3.28293	3.26337	3.80316	5.05964	2.84872	4.29325	3.68348	3.69389	3.15163	3.84	4.15076	3.64856	4.98317	3.80316	3.64856	2.24	3.0568	3.68348	4.17229	3.59555	3.18798	3.2	2.72	3.2358	2.88444	2.75274	3.60976	3.53452	2.83521	2.58488	3.10664
2	4.36715	5.77996	4.65102	4.07922	3.87319	5.79765	4.87672	5.52637	7.01267	3.87319	4.65102	5.65685	3.86988	5.27757	7.48075	4	5.44235	5.02155	4.50848	4.33184	5.86788	5.88748	4.39345	6.4716	4.61511	4.81332	3.7455	4.89506	5.54718	5.20922	6.4716	5.05964	5.12999	3.87319	4.44846	4.39345	5.58168	4.65102	3.89297	3.65207	3.69389	4.49141	2.76203	3.59555	4.22412	4.52548	3.2358	3.32938	4.39345
3	5.67493	6.94665	5.30177	5.21168	5.02155	7.66165	6.3053	7.32688	8.88684	5.47284	5.81529	6.56	5.05964	6.29107	8.67253	5.95449	6.6818	7.69665	6.48346	6.81269	7.01267	8.05263	6.02501	8	6.66837	6.5892	4.60678	6.404	7.70662	6.404	7.91636	6.23179	6.43192	5.46113	5.7288	5.20922	6.17401	5.97381	5.24107	4.5817	5.00112	5.56561	3.79305	4.79466	5.5541	4.89506	4.30813	4.26033	5.27757
4	7.02544	9.17039	6.09892	5.71762	5.47284	9.02973	8.29843	8.59395	9.89545	6.56	6.43192	6.97057	6.45774	6.90785	10.2625	7.5353	8.55364	8.85799	7.73977	8	7.98879	9.95221	7.49442	9.94062	8.67253	8.02556	6.59697	8.42093	8.74748	7.60295	9.10736	7.54718	7.5353	7.23547	7.13571	5.7355	6.29717	6.09262	5.46816	5.63645	5.34026	6.24	5.31865	5.5171	6.11359	5.90051	5.1225	4.96258	6.27477
5	8.09701	10.6805	6.99806	6.6818	6.63759	10.0291	9.37469	10.0749	11.2011	7.8449	7.72155	7.97115	8	9.00702	11.7717	8.97285	9.79012	11.0319	9.8071	9.44542	9.41148	10.4344	9.06369	10.9749	9.9058	8.80436	7.80072	8.95571	10.5648	9.31442	10.7197	8.39657	8.7343	8.39657	8.196	6.08211	6.94112	6.99806	5.97381	6.13241	5.79545	7.08711	6.17401	5.92	7.15005	6.49726	5.79765	6.29107	6.32961
6	8.92135	11.3137	7.76124	8.03512	7.18755	10.6517	10.306	10.8953	11.8551	9.4305	8.53417	9.20939	9.06227	9.89545	12.2712	10.6036	11.1335	12.4791	10.9223	11.0599	9.98815	10.5648	10.1698	11.1794	11.1047	10.024	8.87531	10.0201	11.424	10.1823	11.816	8.94427	9.94706	10.6862	9.64921	6.72762	7.01267	7.13571	7.10155	6.43192	6.44981	7.2778	6.44981	6.57754	7.58103	7.49442	6.02289	6.2482	7.16436
7	11.1416	12.4451	8.73137	8.94427	7.44473	11.6733	11.3137			9.89545	9.41692	10.024	9.50621	12.1136		11.8939	12.2272	13.2474	11.68	11.9715	11.2729	12.2575	11.1634	12.2062	12.0921	10.9363	9.87473	10.4307	12.1316	10.8163	12.6387	10.2413	10.9889	11.0278	10.2724	6.68563	7.87096	8.25978	8.24737	7.31289	6.89672	7.2778	6.5892	6.47951	8.7299	7.64827	6.92451	7.84653	7.72818
8		13.1823			8.28608		12.5357			10.5551	9.5492		9.96634	13.0169		13.1809	12.6441		12.6809	12.6663	11.7183	12.6035	12.1852			11.4362	10.0914		12.4531	11.2922		10.5224	11.4855	11.4296	11.8724	7.24961	7.87096	8.44976	9.03398	6.92636	7.04	8.16627	7.36695	7.49442	8.94427	8.04627	7.2549	7.86608	8.4437
9					9.44542		13.3317				10.4992		10.4307	13.5036							11.4576	12.5587	12.522				10.3754								12.77	7.74142	8.4437	9.10736	9.52101	7.42234	7.36	8.74309	7.76783	7.73977	9.73242	8.95571	7.47048	8.35837	8.87387
10																					11.5382	12.8858					11.0214								12.4482	7.89369	8.31538	9.41964	9.44542	7.38777	7.84	9.6	7.98879	8.48	10.0698	8.77086	7.92283	8.50412	9.2316
11																																						8.82469	10.306	7.88071	7.68	10.2112	7.80072	8.81163		9.39106	7.47048	8.48604	9.73242
12																																								7.62816	7.68666	9.28138	7.87096			9.67041	8.14587	8.98283	9.8071
13																																								7.52681	7.84					9.89545	7.70662		10.1647
14																																														9.05804	7.69665		10.306
15
16
17
18
19
20
21
22
23
24
25
26
27
28
29
30
Figure 4B - Anaphase B spindle elongation velocity (µm/min)							Figure 4C - Maximum spindle length (µm)
wt	klp9Δ	dis1Δ	dis1Δ klp9Δ				wt	klp9Δ	dis1Δ	dis1Δ klp9Δ
1.35577	0.50652	0.724623	0.854374				9.44542	9.70212	9.1648	12.1104
1.24251	0.486728	0.372762	0.67485				11.6733	9.87473	13.1536	10.5648
1.40038	0.674152	0.632503	0.55182				13.3317	10.1924	11.3308	10.26
0.875342	0.733152	0.525823	0.753281				10.8953	9.62663	11.8799	10.3815
0.980708	0.487562	0.639929	0.54808				11.8551	10.342	12.6903	9.82405
0.761982	0.569774	0.92573	0.51435				10.5551	9.31442	12.4697	9.94706
1.26589	0.654864	0.901151	0.748886				10.4992	7.89369	11.9412	8.85799
1.2303	0.622387	0.612599	0.807353				10.024	8.4437	11.4989	8.7869
1.43976	0.582861	0.790168	0.479669				10.4307	9.41964	11.8928	8.17411
1.66577	0.771085	0.645017	0.599524				13.5036	10.306	11.4151	8.99564
1.1345	0.555392	0.407725	0.803106				12.2712	7.88071	10.1256	7.58947
0.89419	0.517354	0.58418	0.60267				13.1809	7.84	10.3815	10.7534
0.971021	0.605023	0.832598	0.635399				12.6441	10.2112	9.1214	8.80145
0.996467	0.522745	0.645017	0.705984				13.2474	7.98879	10.7569	10.0227
1.32349	0.46976	0.407725	0.447471				12.6809	8.81163	12.2667	8.24737
1.53697	0.547337	0.58418	0.77356				12.6663	10.0698	10.1609	10.1647
1.47356	0.604423	0.724177	0.75672				11.7183	9.89545	11.0817	7.51319
1.38966	0.460085	0.537631	0.785596				14.312	8.14587	9.28827	11.8443
1.66267	0.641882	0.645017	0.799375				12.522	8.98283	8.11123	10.2849
1.37913	0.652475	0.407725	0.650873				12.2062	10.4	8.83629	9.28827
1.35896	0.915976	0.58418	0.737742				12.0921	9.00844	11.2057	8.48604
1.13885	0.78177	0.519364	0.452567				11.4362	7.97115	9.23298	10.2413
0.944734	0.657458	0.819022	0.825291				11.0214	8.48604	10.4736	8.71817
1.23822	0.968389	0.717982	0.606432				10.4307	9.47789	8.76502	9.51428
1.38395	0.881294	0.688176	0.477218				12.4531	9.64921	10.2625	11.2285
1.45353	0.604166	0.433272	0.448716				11.2922	7.89369	10.7783	9.59066
1.14885	0.818226	0.495141	0.59919				12.6387	8.4437	8.29843	9.67041
0.94833	0.623811	0.682365	0.485816				10.5224	9.41964	11.2729	10.7212
1.21946	0.565257	0.628826	0.745155				11.4855	10.306	9.09611	9.46708
1.29144	0.764082	0.902311	0.9476				12.77	7.88071	11.5953	8.48604
1.15348	0.599013	0.600247	0.616687					7.84	10.8352	9.05379
1.35917	0.772275	0.725018	0.736231					10.2112	9.94062	10.1357
1.04665	0.633578	0.379262	0.609992					7.98879	10.3222	10.5903
1.14814	0.494002	0.58094	0.446593					8.81163	8.03512	9.21355
1.20349	0.50919	0.693435	0.746197					10.0698	10.1924	8.2365
	0.788292	0.430837	0.942002					9.89545	10.245	9.21355
	0.810545	0.548651	0.556515					8.14587	9.95606	10.384
	0.840732	0.633723	0.682306					8.98283	10.8198	8.94427
	0.825256	0.596143	0.78761					10.4	12.825	7.5217
	0.838227	0.485944	0.769678					9.00844	13.28	10.26
	0.802102	0.56315	0.574217					7.97115		10.1698
	0.750685	0.690588	0.909128					8.48604		9.51428
		0.54774	0.868224					9.47789		8.30306
		0.364116	0.717703							8.82759
		0.520769	0.712221							10.142
		0.450594	0.581568							12.5001
		0.629213	0.587389							10.3457
		0.645089	0.754614							10.0901
		0.595796	0.652981							11.3408
		0.596191	0.940654							11.3701
		0.658549	0.677631							10.2812
		0.711654	0.648148							9.63328
		0.806778	0.53207							9.87862
		0.512239	1.02662							11.8918
		0.715394	0.688312							11.1634
		0.599918	0.556479							10.9609
		0.787707	0.812169							13.7175
		0.657814	0.565329							12.2695
		0.642828	0.528715							9.87862
		0.432223	0.37921							9.39106
		0.750069	0.812335							10.6577
		0.441204	0.437561							11.4944
		0.455555	0.722066							10.2165
		0.418797	0.710161							12.103
		0.50999	0.640745							11.9476
		0.716493	0.798408							11.5378
		0.731742	0.5752							11.3701
		0.673245	0.53978							8.59395
		0.447087	0.414195							10.4307
		0.816982	0.511461							11.1312
		0.78518	0.698193							10.5272
		0.794756	0.521098							11.5876
		0.714043	0.506459							11.2922
		0.814021	0.858907
		0.784408	1.00454
			0.372727
			0.354718
			0.62468
			1.03561
			0.388877
			0.755703
			0.563868
			0.461898
			0.600298
			0.336614
			0.791249
			0.58851
			0.763571
			0.423481
			0.567249
Figure 4D - Klp9-GFP intensity (AU) throughout anaphase B progression
Time of anaphase B (min)	wt																														dis1Δ
0	2364	2296.65	1334.84	1284.51	3199.86	1603.92	1820.32	1753.77	1159.4	3063.97	3720	2997.76	1695.1	2605.2	2792.79	1618.32	4428.8	3498	1893.9	1854.2	2807.56	1207.96	990.72	2537.6	1877.2	2406.72	1829.61	1239.84	1068.36	1958.18	2742.9	1963.84	1942.56	2605.68	1506.6	2071.68	749.07	1148.63	1268.2	2094.84	1945.68	1201.2	1276	2095.25	2274.48	838.5	2832.28	1605.56	2216.25
1	3731.67	3171.7	3958.7	2267.37	3830.56	1960.96	2024.77	3498	3432.44	2475.85	4956.36	4575.6	1855.18	2474.86	2873.52	3450.3	3200.68	3309.24	1455.3	2417.76	3301.32	2090.76	2170.56	1878.56	2208.69	2906.28	1896	2373.36	1997.04	2691	2498.62	2425.4	2646.98	1540.08	1245.59	1629.32	922.5	648.9	646.68	1845.07	2187.25	2653.2	1584.72	2498.6	2389.2	792.65	2150.61	2010.77	2926.08
2	4056.54	3405.84	3105.36	2801.04	6539.13	3468	2961	4633.26	4592	4743.9	5379.84	5942.8	3536.85	2396.28	2929.92	3816.44	4270.28	4195.38	2116.92	2453.49	3874.64	3316.01	2011.05	2411.2	3834.12	4497.9	2493.12	2629.31	2509.78	2170.56	2538.24	3320	2450.8	1811.7	1042.8	1237.43	605.43	686.4	1652.12	2506.6	1778.7	2632.9	1085.6	2736	2569.56	1588.08	3024.96	2838.66	2867.54
3	5099.58	4038.58	3974.24	3894	5557.65	3350.16	2982.2	5408.34	5107.77	4054.08	3643.64	5121.48	2853.24	2355.2	3892.76	5794.56	5485.48	3892.76	1645.44	2442.76	4997.52	5806.32	3886.74	3056.55	3988.2	3735.9	3152.68	2721.44	2753.1	2693.07	3527.55	1953.48	2007.44	1587.92	531.08	659.75	890.96	1501.14	615.16	2506.32	1180.03	2491.83	1664.7	2651.12	2601.9	1375.91	3183.08	3235.7	3106.96
4	6107.42	2792.4	5037.36	3598.98	4979.5	2875.61	3304.44	4047.61	3425.1	4021.68	3508.82	4232.82	3033.63	2682.72	4430.34	4932.9	4980.15	3462.9	1952.1	3008.75	5082.77	4566.88	3396.9	2768.04	4105.89	3847.41	3801.96	2633.04	3317.38	3623.16	4504.48	2268.16	1801.36	2022.12	1767	1556.47	1597.44	796.05	729.24	2254.53	1923.48	2232.36	1630.58	2366.98	3455.87	1694.7	2387.64	1902.47	2383.26
5	4052.29	2564.1	5250.84	3195	5264.4	3407.34	3325.92	4405.44	4506.22	5837.02	3778.02	5518.7	3437.58	2526.72	4200.14	3719.07	5368.26	3951.09	1514.13	3399.8	4178.37	4887.48	2509.18	3566.16	4740.79	5540.78	2371.85	2484.3	2619.94	3554	2470.38	2510.08	2616.9	1394.61	1244.25	839.25	252.16	868.58	1289.45	1882.56	1739.01	1965.6	1387.54	2996.66	1008.9	2286.65	2602.26	2177.28	3438.4
6	5604.7	2847.96	4196.61	2213.66	6399.51	4394.32	3678.3	5518.87	5482.36	6220.96	4332.11	6492.15	3501.72	3517.44	4218	3925.64	5987.15	4011.32	2126.76	3533.2	5683.3	7446	3941.44	3493.17	4305.76	5624.4	3281.53	3254.2	3236	4759.24	1111.56	1981.35	2711.45	2231	991.82	621.81	864.32	380.14	1561.34	1713.51	1638.8	2349.56	1034.77	1743.4	1362.5	1508.7	4095.72	2083.84	3762.72
7	5107.04	2614.88	5117.21	3361.28	7782.16	4218.8	3851.54	4598.82	5246.76	6566.65	4383.54	6210.82	5034.08	2880.24	3993.37	4703.22	7173.07	4203.6	2700.88	2899.26	6137.4	6607.17	3781.14	3835	4068.9	6145.44	3629.56	3232.97	3273.52	5412.96	1845.48	2138.4	2414.61	2504.36	690.06	1256.24	963.38	635.55	1875.5	2734.93	1496.25	1757.7	1162.24	2207.86	1747.17	1984.5	3152.4	3348.48	2907.09
8	5977.88	3106.4	5673	2391.46	7115.65	4131.84	5316.18	5049.44	6962.34	7696.07	4329.6	7021.44	4925.07	3526.38	4681.6	4874.42	7081.52	3957.23	2161.08	2534.56	5884.55	6090.48	5204.9	4641.28	4342.9	6193	4427.04	2860.18	3207.24	6241.5	1637.6	1991.21	1870.97	2718.48	573.11	1406.94	826.5	487.5	988.92	2624.12	1551	1799.88	1523.2	2544.74	2098.8	1482.6	2898.5	1703.28	3043.9
9	6057.98	3528	4881.95	3078.09	7711.44		4689.68		5951.15	7104.9	4589.44	6660.17	4351.2	3935.76	6348.58	4497.9	6050.61	4559.67	2357.5	2717.55	5874.75	4615.38	4982.25	3913.14	4973.98	6573.42	4413.03	3292.38	3291.3	6745.6	1297.66	2085.81	2252.16	2502	842.52	1227.51	752.76	459.38	1848.22	2581.87	1771.65	1257.41	1400.56	2134.08	1991	1633.5	3268.85	1966.39	2335.23
10	5503.92	3537.6	5650.8	3146.24			5393.24		5131.53		4093.6	6489	4355.28	4078.98	4982.18	3708.04	4457.25	3506.6	2211.44	2711.25	7134.72	4669.32	5048.2	3504.14	5759.52	6821.22	3127.9	3297.3	3276.91	6333.9	2033.15	2514.72	2189.46	2534.7	529.76	1197.55	683.55	731.44		3060.72	1951.72	2261.51	1156.4	2540.31	1993.62	1355.2	2496.72	1592.1	2732.4
11			6370.65	3478.44								6498.76	5073.18	5599.53	5139				2682		6755.1	3733.32	4990.86		5064.72			2918.4	3881.25	6138.02	1990.92	1978.01	2864.4	1769.56	820	1147.16	521.6	824		2519.88	1559.25	1681.7	1398.26	2048.64	1648.32	1472.04	3094.14	1869.9	3019.53
12															5527.3				2449.04		6824.61							2659.14			1545.04	1477.44	2487.06	1476.3	772.56	1172.36	374.68	590.85		2372.16	884.12	1437.37	1021.25	2094.67	2180.64	1435.51	3221.4	1382.66	3106.84
13																															2177.79	1916.88	2807.7		431.88		987.36	771.61		1837.74		953.36	1002.33	1743.44	2024.6	1701.8	1878.21		2421.98
14																															1701.88	1414.31	2616.6				671.6	811.44		2272.62			966.6	355.11	2012.35	1635.78	1722.98		1826.55
15																															1777.88	881.28	2382.8							2241.99					1274.59	1177.44	1273.68		1824.22
16																															2138.4		1353.09							1761.9						3047.1	1361.52
17																															1562.88		776.31							1329.21
18
19
20
21
22
23
24
25
26
27
28
29
30
Figure 4F - Intensity spectra of Klp9-GFP along the early anaphase spindle (t=1)
Distance (µm)	wt																													dis1Δ
-8
-7.84
-7.68
-7.52
-7.36
-7.2
-7.04
-6.88
-6.72
-6.56
-6.4
-6.24
-6.08
-5.92
-5.76
-5.6
-5.44
-5.28
-5.12
-4.96
-4.8
-4.64
-4.48					391
-4.32					376
-4.16					256
-4					207
-3.84					402
-3.68					489
-3.52					915			230																													746									15			0
-3.36					1008			77	0		0													0													1053				80					116			0
-3.2					1348			165	0		0													0		0											797				241			272		407			0
-3.04			8		1466		7	310	0		213										153		0	0		0			0								1087	0		0	321			362		660		0	0
-2.88			222		1543		40	301	0		435	0		0					0		323		0	100	386	2			0								1297	222		76	1017	591		449		655	363	0	0
-2.72	217	298	472		1344		256	447	387		746	0		0			96		358		697		0	0	1001	125	163		0		0						1399	296		541	1039	839		675		851	139	172	0
-2.56	32	0	677	0	1168		165	892	922	0	494	0		127		0	415	0	599		870		0	0	598	190	82		0		0		1204	0			1110	760		575	911	624		629		1255	478	239	0
-2.4	154	364	795	0	1331		77	882	1000	0	563	0	469	543		0	632	468	620	0	1169	0	0	195	696	278	328		454		0	25	756	0	0	171	1072	1154		854	1008	909		711		1539	759	659	0
-2.24	575	355	804	62	1630	0	297	813	934	89	514	0	658	728	0	274	803	497	668	0	1277	0	0	475	781	586	206		568		104	655	1081	0	453	29	1194	1314	358	620	1152	583	0	603		1394	809	512	160
-2.08	445	330	1248	362	1710	17	303	1213	992	329	865	0	585	591	0	690	894	602	688	170	1235	414	0	592	1061	399	486		631	4	786	1154	839	0	330	426	1009	1029	698	802	1179	606	0	613	0	1435	880	390	228
-1.92	621	793	1021	566	1922	444	681	1622	1268	656	894	66	954	710	157	835	1089	519	740	363	1181	280	238	831	957	431	825	381	763	0	847	1225	1087	6	560	511	880	1252	1054	672	1163	500	0	690	0	1107	908	607	203
-1.76	771	730	1185	979	2480	610	709	1228	1724	1139	967	180	873	905	435	1040	1408	778	694	540	1086	573	190	1139	1588	491	846	420	978	0	910	1467	636	202	475	651	926	741	1544	661	784	502	231	643	126	1361	928	877	396
-1.6	856	419	1352	1215	2613	725	931	1450	1902	1482	1443	400	1223	749	301	1342	1411	581	711	671	1393	645	98	1194	1404	675	803	457	617	0	1228	1340	967	280	453	663	979	792	1711	640	766	784	289	1023	423	1182	739	984	385
-1.44	940	489	1320	1183	2294	794	1248	1465	1672	1931	1138	689	1596	989	614	1389	1375	697	719	1176	1771	704	522	1076	1345	690	958	408	1058	475	1244	1555	994	396	669	860	849	1184	1539	547	552	907	674	783	677	1300	1149	890	505
-1.28	1264	944	1642	1252	1781	1219	1533	1185	1923	2149	964	1130	1963	1172	823	1675	1700	694	1075	1516	2132	856	491	1166	1769	799	938	587	1447	1026	1388	1636	965	634	511	1069	705	1390	1707	524	417	931	508	806	1159	1244	1188	1028	266
-1.12	1523	1262	1784	1363	1697	1246	1670	1388	1949	2832	1616	1082	1949	1311	476	1405	1731	710	1163	1751	2263	858	633	1401	1777	724	1164	880	1146	1363	1217	1774	937	542	550	745	502	1355	1737	810	598	922	923	680	1567	1093	951	1501	753
-0.96	1752	1417	1951	1152	1741	1263	1324	1678	1919	2737	1697	1196	2205	1476	766	1595	2054	1188	1282	1805	2215	1163	865	1465	1897	896	995	1461	1177	1624	969	1374	896	584	542	623	187	1477	1568	720	507	1080	633	873	1166	619	953	1450	819
-0.8	2423	1682	2283	1122	1363	1426	1238	1765	2093	2312	1217	1637	1677	1556	1341	2464	1981	1286	1447	1870	2323	1418	598	1744	2020	1114	928	1574	1100	1749	1134	1410	606	465	557	475	247	1722	1399	375	220	1070	1223	771	1009	354	1227	1675	872
-0.64	2738	1956	2238	1162	1715	1472	1341	1758	1712	2141	1457	1652	1649	1423	1423	2088	2252	1093	1405	2259	2459	1285	696	1917	2457	1137	1407	1612	1299	1828	1358	1398	649	608	208	655	333	1230	1411	514	280	944	860	641	1231	336	1493	1472	637
-0.48	2731	1849	2297	1249	1338	1357	1307	1672	2036	2327	1656	1222	1690	1461	1321	2401	2405	1013	1121	2468	2372	1230	868	1505	2362	1222	1773	1730	1197	1602	963	1486	241	689	499	778	284	817	1448	375	449	890	928	495	1272	319	999	1418	637
-0.32	2794	1697	2326	1494	1284	1660	1187	2218	1635	2060	1639	1382	1674	1524	1442	1953	2720	1115	1240	2198	2307	1435	871	1676	3300	1413	1430	1570	1256	1481	968	1344	206	600	417	642	157	1113	1471	596	554	873	769	476	1359	332	1229	1046	701
-0.16	2724	2092	2082	1424	1096	1721	1285	2005	1879	2166	1719	1715	1829	1441	1592	1881	2424	1209	1530	2569	1745	1522	694	1722	2917	1321	1653	1547	2178	1559	1034	1230	688	705	466	463	277	1047	1482	475	446	571	871	592	964	429	1339	1240	696
0	2512	1601	2112	1470	913	1711	1510	2028	2205	2011	1521	2133	2077	1832	1880	2063	2523	1463	1460	2447	1749	1582	604	1728	2759	1145	1288	1275	1845	1513	889	1718	179	777	480	629	417	703	1154	385	490	496	942	320	896	788	966	1186	826
0.16	2279	2114	2029	1742	1237	1504	1204	1912	1876	2041	1643	2245	2089	1765	1640	1470	2560	1226	1540	2731	2008	1150	1032	1512	2288	895	1311	1241	1509	1899	760	1624	464	747	564	540	478	971	1068	476	229	486	1064	643	1121	446	1242	1132	781
0.32	2334	1886	1646	1649	1454	1516	1085	2052	1778	2062	1847	2628	1764	1978	2166	1849	3110	1167	1785	2497	1465	1282	863	1640	2449	1106	1362	1229	1526	1875	663	1827	474	810	442	599	304	998	1486	489	322	604	1351	484	943	547	1176	1082	955
0.48	2382	2437	1695	1800	1369	1606	1209	1761	2027	1883	2088	2711	1603	1432	2097	1946	2987	1326	1860	2711	1594	1329	805	1718	2130	1229	1152	897	1528	1847	801	1840	618	766	544	450	267	1282	986	367	77	580	1165	618	252	388	1318	969	1178
0.64	1967	2414	1625	1668	1476	1669	1313	1625	1865	1481	1624	2504	1542	1502	1762	1697	2582	972	1553	2196	1904	1194	835	1638	2239	1343	729	773	1451	1995	992	1718	691	846	599	541	215	1186	890	431	184	505	1059	729	167	553	1197	849	877
0.8	2337	2088	1652	1630	1142	1563	1120	1333	1537	1208	1442	3023	1724	1144	1822	1654	2306	866	1460	2112	1926	733	1042	1459	2073	1317	719	601	1450	1626	1102	1765	1085	808	707	518	391	1153	834	408	404	765	787	639	327	645	1354	1064	694
0.96	2007	2142	1237	1379	1389	1318	948	1043	1671	1326	1371	3051	1510	1014	1525	2272	2500	880	1381	2158	1639	626	1084	1452	1956	1305	669	416	1460	1800	1350	1626	1024	703	894	604	327	877	896	489	570	956	1011	590	235	900	1357	672	557
1.12	1471	1825	1091	1297	1416	1321	835	1032	1480	1272	1138	2439	1618	926	1133	1886	2155	587	1265	1348	1334	535	1193	1155	1858	1399	618	141	1034	1425	1275	1631	1102	683	705	681	177	1299	751	449	548	792	610	649	373	905	1541	1026	733
1.28	1416	1203	951	915	1708	1186	707	883	1403	1594	1109	2200	1498	978	764	1454	2164	431	1410	1364	1279	716	1218	1041	1975	968	528	0	746	1669	1541	1540	708	864	698	599	456	1716	646	504	530	1003	869	508	2	1047	1440	859	699
1.44	807	805	1009	651	1771	766	657	959	1091	1526	999	1739	1321	930	742	1485	2058	120	1291	1087	1068	587	1219	887	1667	939	178	59	625	1094	1447	1133	686	870	618	434	451	1741	358	670	781	1005	327	669	340	1289	1792	1043	1058
1.6	630	879	1246	483	1639	870	791	520	1250	1456	875	1469	1245	855	472	1239	1936	144	1004	836	1243	714	865	535	1901	823	56	0	483	973	1380	1269	770	730	602	651	511	1829	415	675	452	1133	408	610	344	1053	1253	656	1082
1.76	355	853	1241	423	1645	737	672	513	1085	930	824	1238	1196	521	308	1023	1976	341	963	745	1220	520	614	223	1552	822	0	0	347	788	1621	1103	766	777	545	735	609	1690	99	631	730	925	98	555	0	1133	1855	306	900
1.92	52	782	1122	192	1906	638	700	432	549	1082	1017	1058	1008	612	101	777	1661	244	842	526	998	588	486	199	1356	766	143		453	154	1343	500	935	892	149	307	716	1739	89	819	456	985	0	620	0	1208	1480	267	1094
2.08	0	538	630	185	1843	542	736	465	425	1006	909	976	802	546	0	374	1437	359	598	399	998	221	226	0	1080	647	0		189	194	1214	251	824	570	83	451	674	1434	28	862	784	922	0	702		1244	1364	91	1264
2.24	0	100	713	0	1846		463	158	389	968	549	772	685	363	0	46	1402	115	454	179	967	236	313	32	951	598	0		8		1210	0	552	564	0	632	612	964	0	795	628	735		756		1223	1422	161	833
2.4	0	0	266		1604		289	458	238	731	688	442		232		0	1067	0	152	130	674		275	0	663	325	0		0		665	0	445	273	0	275	394	514		512	893	703		554		1195	806	0	519
2.56	0	0	147		1237		75	0	40	227	594	569		0			953		209		380		119	0	858	101	0		0		760		350	34	0	283	704	283		238	851	688		751		1133	1010	0	564
2.72			64		1199		15	120	0		566	412		0					0		364		30	0	177	158			0		326		402	0		0	864	52		153	737	488		444		979	845	0	261
2.88					1175		91	0	0		548	0									392		0	0	59	158			0		62		0				754	105		112	661	206		452		822		0	348
3.04					800			0	0		0													0		100			0		0						831			0	731			515		464			203
3.2					699			0			27													0													1083				265			409		244			176
3.36					531																																935				263					98			0
3.52					541																																583									0
3.68					515																																495
3.84					539																																348
4					531																																268
4.16					525																																72
4.32					449
4.48
4.64
4.8
4.96
5.12
5.28
5.44
5.6
5.76
5.92
6.08
6.24
6.4
6.56
6.72
6.88
7.04
7.2
7.36
7.52
7.68
7.84
Figure 4F - Intensity spectra of Klp9-GFP along the late anaphase spindle (t=2)
Distance (µm)	wt																														dis1Δ
-8
-7.84
-7.68
-7.52
-7.36			198																						225
-7.2			111																						194																	252
-7.04			301				0										0								262																	549
-6.88			283		249		0	0	0		0						22								129																	728
-6.72			410		471	85	0	133	0		0				0		10								267																	687
-6.56			420	139	641	144	0	40	0		0	0			0		408							0	565		213															711
-6.4			460	0	507	273	0	363	0		366	0			84		291	110				0		0	318		483															986
-6.24			569	35	598	527	0	415	95	0	250	0		184	104	0	247	331				403		5	363	74	457															718							399
-6.08			571	243	568	560	53	437	490	0	447	67		77	281	0	345	464	0	213		637		179	510	405	581	42										536				518				0			530
-5.92			760	275	329	825	76	652	614	0	424	282	70	257	220	0	311	513	21	264	0	763	391	268	585	497	885	23		111								561				356				428	0		800
-5.76	0		428	369	539	574	66	486	646	169	600	365	181	336	470	245	140	589	181	390	34	471	218	105	533	858	718	151		184							0	922	216			500	490			702	117		814
-5.6	0	529	612	653	486	451	0	696	652	282	645	530	545	231	679	539	95	547	179	369	238	439	292	141	435	987	710	362	0	362			869				178	1234	202		603	292	692			1199	153		975
-5.44	30	382	700	611	708	417	75	391	659	481	699	584	795	355	883	751	0	426	261	400	240	426	314	292	470	954	736	181	155	664			1036	0			253	1445	825		734	355	912	557	691	1307	310		1201
-5.28	250	120	584	432	795	532	183	587	1022	710	315	486	526	438	704	497	118	567	338	596	557	484	428	297	491	1171	773	358	0	646			1521	167			673	1390	1232	1097	565	384	1188	749	914	1296	600		1414
-5.12	250	505	535	644	571	652	34	797	978	903	546	705	508	497	626	721	9	464	452	624	457	591	538	238	669	736	751	429	114	608	661	1643	1883	460			835	1511	1276	1249	667	285	1194	962	1124	1547	965		1431
-4.96	373	407	350	585	446	667	0	1030	901	916	560	750	396	528	395	501	0	240	638	455	462	293	495	96	307	869	646	288	290	454	1192	1641	1901	726			963	1452	1489	1891	620	392	1523	1018	1286	1607	891	46	1610
-4.8	320	494	428	763	568	529	0	657	860	994	423	670	539	383	414	549	307	303	503	517	156	367	546	260	350	528	623	157	108	452	1618	1597	1996	695			970	1692	1322	2571	477	539	1544	1070	1176	1511	714	3	1741
-4.64	301	469	250	751	416	364	0	424	763	1158	253	647	487	543	328	443	200	246	589	552	359	228	629	395	470	476	836	323	344	570	1915	1506	2113	990	0		687	1472	1225	2915	232	444	1178	1273	1133	1382	1004	679	1780
-4.48	593	386	43	469	384	438	0	176	758	1269	0	468	766	622	330	462	241	185	482	405	607	340	704	501	341	658	659	328	420	905	1950	1237	2146	1224	242		815	1070	1219	3026	324	179	1002	1207	1189	1339	786	1152	1735
-4.32	743	339	0	484	223	547	0	424	812	1056	0	452	776	639	397	472	72	80	512	488	500	309	596	146	317	870	731	84	429	664	1911	1151	1920	1165	500	442	891	894	1196	3171	35	0	952	1058	1203	1359	759	1195	1705
-4.16	641	463	55	465	197	436	0	260	830	690	0	547	661	367	374	238	0	39	336	578	243	581	459	117	89	1098	617	0	202	730	1839	1271	1785	948	598	405	469	1060	1269	3016	0	0	1043	873	1107	1001	838	1195	1786
-4	682	503	336	350	306	288	0	306	817	856	0	631	560	139	392	281	0	26	407	517	537	438	461	179	251	973	664	138	217	655	2150	1085	1657	1145	776	763	355	942	1002	2838	54	0	1064	768	1175	1080	675	1376	2020
-3.84	533	360	0	302	371	251	92	63	387	850	0	433	368	240	538	247	0	0	344	464	558	603	269	243	236	880	580	202	476	747	1434	1118	1716	1059	923	804	322	1106	888	2901	57	0	921	916	1001	944	492	1034	1565
-3.68	592	129	0	240	353	54	0	145	519	727	0	187	607	296	538	429	0	0	280	478	449	650	740	546	243	665	434	12	310	672	1204	1068	1667	1100	884	930	223	1091	730	2623	0	0	634	731	972	718	593	1104	1667
-3.52	948	393	0	301	142	0	0	290	544	820	0	206	381	410	638	305	0	34	123	451	184	265	593	348	184	682	331	253	283	289	1314	527	1322	897	1053	1103	220	862	469	2941	0	0	547	1039	961	779	471	972	1463
-3.36	827	279	0	0	135	32	0	-69	382	793	122	188	340	206	459	210	0	0	37	417	0	0	469	227	48	613	661	99	469	178	1417	259	1653	737	1205	1098	55	971	292	3027	0	14	454	949	887	451	254	909	1652
-3.2	733	217	3	0	252	0	0	517	111	558	7	185	525	25	50	0	0	99	419	532	0	5	369	188	27	334	434	0	199	340	1012	257	1617	1172	793	1054	313	648	298	2600	0	0	209	914	852	570	268	833	1467
-3.04	731	240	0	0	356	4	0	256	117	496	0	104	449	187	108	0	0	35	333	458	0	276	37	473	106	179	141	0	208	215	532	226	1531	840	565	1085	72	558	230	2638	0	0	282	810	495	395	218	800	1142
-2.88	642	10	0	0	568	16	0	715	254	489	0	104	286	240	107	58	3	132	137	229	0	196	126	1	0	301	284	0	165	40	527	167	928	1174	609	1010	116	308	290	1997	0	73	258	482	468	115	287	461	1192
-2.72	529	124	0	0	315	119	152	245	203	282	0	82	0	148	111	74	0	0	191	208	0	415	359	200	45	179	255	0	271	0	297	192	656	921	735	860	41	343	256	1366	65	66	259	416	403	152	169	96	1258
-2.56	351	0	217	0	416	62	364	724	0	483	0	316	5	127	132	148	188	0	169	95	0	443	297	0	0	20	359	0	168	62	269	493	440	691	704	699	35	412	335	1008	207	309	211	261	391	138	0	236	816
-2.4	413	0	346	0	709	0	381	31	0	467	0	250	186	154	140	0	0	0	324	73	79	337	274	0	0	0	269	0	204	253	451	603	307	844	414	526	0	286	239	467	26	350	400	394	316	169	27	163	936
-2.24	168	0	745	0	889	0	199	74	153	643	0	175	341	0	263	0	3	16	100	278	129	368	425	0	295	29	260	0	314	113	626	847	467	554	386	648	0	177	251	504	224	444	436	47	605	142	31	234	715
-2.08	120	0	1651	0	1556	70	248	423	293	572	115	51	166	0	107	0	12	84	0	237	78	284	265	0	420	372	318	0	384	-34	261	923	451	469	446	360	0	12	257	511	445	736	330	0	435	442	198	187	487
-1.92	33	0	2211	0	3149	7	543	705	505	542	283	203	21	91	0	189	257	43	0	296	0	394	316	0	856	187	400	0	288	155	315	930	362	407	269	223	181	0	94	509	612	818	746	129	476	553	296	13	479
-1.76	0	0	3365	0	4969	0	1318	609	656	298	533	243	0	18	72	438	144	68	0	258	166	399	339	0	1204	196	769	66	299	291	258	842	283	162	0	336	207	86	113	494	628	722	764	211	583	369	121	120	518
-1.6	20	0	3759	0	5539	6	2217	525	535	316	637	171	54	67	0	571	523	78	0	325	407	716	645	92	1615	137	1143	388	353	144	580	775	235	378	0	326	59	121	337	696	653	773	979	158	691	343	105	-151	648
-1.44	174	219	4396	108	6217	35	2913	426	709	446	1215	237	5	549	0	666	1077	870	106	885	575	1248	842	217	1928	723	1307	895	9	378	581	766	203	373	50	261	9	0	346	821	705	884	1153	211	587	555	33	164	739
-1.28	335	269	4266	321	6997	178	3611	775	1149	807	1985	451	197	1018	305	1074	1207	1164	401	1070	1090	1847	996	568	2262	811	1620	1310	366	502	364	795	322	646	0	388	106	339	405	1044	607	857	1155	411	517	593	41	515	1296
-1.12	335	874	4124	774	7083	367	3660	1152	1633	1332	2300	1077	647	1077	661	1825	1460	1584	520	1298	1869	2598	1735	982	2338	1053	1865	2210	955	532	379	737	447	348	0	451	0	307	517	1326	815	969	803	244	496	790	184	712	1796
-0.96	433	1646	3913	1115	5882	568	3490	1324	2085	2116	2438	1681	871	1242	994	2331	1446	1966	625	1159	2400	2467	2306	1584	2332	2010	1807	2321	1213	936	589	912	663	1031	0	526	94	216	742	1205	675	843	687	587	745	814	307	833	1843
-0.8	819	1880	3335	1543	4668	649	3080	1526	2743	3459	2483	2204	1189	1414	1118	2383	1949	2097	831	1259	3112	2856	3180	1821	2068	2313	1988	2308	1722	1983	725	879	852	1006	0	474	135	329	884	1308	466	558	604	788	779	525	496	833	1793
-0.64	1826	2022	2974	2214	3653	863	3212	1866	3561	4739	2793	2101	1375	1912	1432	2177	2227	2532	1044	1171	3148	2675	3658	1981	2255	2667	1975	2643	2005	2672	727	825	1229	1269	145	537	513	273	985	1307	486	578	533	1047	759	608	479	699	1684
-0.48	2813	2229	3119	2238	3000	958	2903	2203	3732	5099	2657	2435	1656	2243	1867	2239	2885	2131	1389	1167	3737	2698	3918	2144	2239	3267	2456	2848	2285	4073	734	984	1481	1717	276	548	306	353	1003	1154	777	664	435	1372	818	1041	608	1210	1561
-0.32	4472	2198	2648	2740	2598	1180	2811	2592	3561	4751	2528	3214	2176	2548	2005	2447	2996	2135	1555	887	3784	3058	3878	2601	2471	3465	2547	2442	2404	4530	714	380	1885	1558	381	445	270	601	822	1104	585	435	421	1239	766	1036	643	1292	1082
-0.16	5126	2340	2377	2512	2230	992	3042	3335	4056	4520	2721	4007	2585	2296	2714	2584	3496	2338	2112	1232	3897	3315	3776	2478	2462	3479	2396	2763	2678	4714	442	235	1612	1736	418	684	396	631	1370	1051	632	481	851	1318	592	1156	756	1018	1201
0	5415	2339	2095	2547	1655	1283	2459	4109	4188	4536	2665	4038	2951	2561	2835	2936	3418	2405	2217	1025	4210	3366	3737	2688	2236	3248	2508	2797	2874	4580	541	222	1558	1695	269	496	475	655	1117	707	566	466	370	1719	436	963	722	1594	1303
0.16	5796	2425	1468	2638	1578	1415	2115	3916	3674	3833	2481	3789	3419	2853	2971	2479	3394	2610	2152	976	4526	3091	3236	2703	2244	3084	2516	2117	2806	4548	769	64	1448	1438	401	350	468	312	1431	710	377	506	96	1513	725	1172	712	1422	1098
0.32	5745	2410	1188	2338	1538	1372	1708	3058	3501	3596	2292	3378	3420	2355	3007	2324	3830	2327	1964	719	4988	2950	2907	2405	1598	3092	2187	1384	2575	4791	771	273	1432	1523	289	427	398	127	1329	677	566	372	333	1323	757	1006	792	1461	672
0.48	5139	2274	1007	2158	1399	1464	1390	2447	3446	2949	1737	3164	3127	2091	3036	2345	3688	2061	1899	951	4521	2113	2402	2627	1245	2866	1711	764	2016	4359	997	161	1396	1100	490	524	297	251	1011	591	172	163	330	1112	775	1091	924	1538	774
0.64	4334	2345	855	2052	1574	1452	760	2334	3168	2836	1020	3369	3491	2146	2906	2077	3169	1813	1383	1127	4178	1802	1603	2729	953	2142	1745	185	973	3619	866	181	1199	900	644	606	206	1	1050	483	400	409	249	935	957	1046	1039	1007	610
0.8	3065	2174	640	2155	1028	1788	263	2006	3013	2961	692	3104	2399	1766	2470	1587	3185	1481	997	876	3309	1580	1118	2601	726	2055	1631	0	686	2297	1045	174	1115	1227	842	582	119	0	929	353	299	439	301	557	634	1023	651	621	932
0.96	2470	2141	426	1861	826	2085	203	1723	2529	2292	369	2691	1926	1414	2380	910	2407	998	546	868	2210	902	726	2260	570	2235	1260	0	580	1757	1197	278	923	692	722	726	150	0	593	270	229	460	10	44	435	1237	752	450	791
1.12	1801	1665	146	1068	590	1615	0	1692	1926	2374	289	2035	1555	958	1935	670	1812	470	255	1040	1304	323	514	1627	673	1519	1170	0	76	1021	1281	315	838	318	412	738	146	151	582	246	127	296	63	0	599	1021	910	354	522
1.28	871	799	107	607	373	1006	0	1391	1123	2067	135	1557	848	733	1438	485	889	422	102	838	781	253	363	1480	438	986	1290	0	0	454	1133	441	543	277	505	453	155	0	318	187	279	329	0	74	489	1110	511	235	533
1.44	294	464	391	313	482	645	0	956	725	1482	0	839	517	410	783	194	287	212	2	661	936	188	442	1473	142	745	1185	0	40	252	1204	395	404	210	558	151	78	0	136	318	243	229	312	70	500	991	406	-77	534
1.6	248	148	193	141	489	270	0	778	253	599	0	337	347	460	446	52	77	0	190	351	595	0	209	714	0	438	1007	85	10	329	731	450	249	35	216	327	35	266	0	218	260	236	324	0	453	650	384	-200	553
1.76	332	186	6	225	587	68	29	350	547	166	0	341	222	365	228	0	0	0	88	197	373	122	0	448	25	445	585	0	11	275	543	344	172	164	325	501	0	206	0	146	318	104	213	84	480	678	313	-17	917
1.92	93	379	114	142	240	0	166	70	438	317	30	458	428	302	66	206	0	0	159	26	179	74	36	476	0	708	710	0	-6	235	440	288	300	189	378	324	0	167	0	207	153	0	218	0	446	772	464	-169	595
2.08	81	227	0	292	234	0	91	0	439	372	124	447	193	398	142	107	0	62	0	65	346	0	0	528	0	279	545	0	158	545	775	452	107	400	409	459	0	255	11	363	74	122	215	50	286	308	170	92	422
2.24	253	193	0	373	358	0	183	22	241	472	203	235	201	270	91	31	191	9	87	0	149	395	303	536	0	101	435	0	12	434	827	479	193	386	646	603	65	293	261	177	46	160	391	73	589	162	318	122	444
2.4	171	146	0	276	307	0	0	193	185	111	237	93	204	469	108	90	41	96	0	41	308	261	379	637	0	167	623	62	34	730	618	780	157	196	751	699	266	202	224	302	305	58	262	200	769	316	191	78	271
2.56	205	233	0	0	220	0	0	262	223	316	70	202	190	298	77	66	216	0	0	0	513	295	301	566	0	203	491	108	148	571	579	795	192	137	764	860	223	0	208	436	554	0	238	296	718	177	133	325	53
2.72	423	401	0	99	299	109	0	36	18	272	4	291	581	246	43	197	313	0	48	0	279	216	207	395	0	324	439	115	0	435	1149	1083	589	518	796	757	381	8	378	828	493	100	122	398	957	205	50	469	384
2.88	430	554	0	176	378	81	133	7	310	389	53	134	727	251	37	284	188	0	205	0	111	95	251	392	1	436	379	141	14	270	1027	1306	532	348	1164	982	465	223	341	1220	541	154	106	427	797	290	0	536	931
3.04	542	539	0	0	463	89	0	0	142	264	65	189	631	208	35	160	175	0	192	0	337	186	158	555	0	273	551	0	201	252	1413	1733	512	667	1544	786	448	179	675	1307	797	51	377	696	746	185	0	980	726
3.2	540	822	41	0	533	38	113	0	489	39	218	256	677	551	20	358	169	0	115	0	420	287	280	528	0	380	552	0	231	503	1703	1501	848	772	1563	631	416	142	452	1644	1019	17	294	860	897	102	0	876	1172
3.36	469	863	0	162	376	0	41	56	662	93	235	75	758	546	0	331	148	0	173	116	580	222	610	670	0	569	262	0	534	397	1935	1582	971	1068	1611	646	515	238	467	1547	1145	206	284	876	725	0	52	1225	1279
3.52	433	465	4	296	460	70	0	0	584	308	211	292	768	595	60	413	261	0	212	301	330	575	406	421	0	590	269	163	257	508	1812	1471	1026	969	2003	589	569	302	619	1626	1360	39	433	994	542	148	200	1073	1348
3.68	1028	491	0	363	421	168	0	168	425	423	494	433	734	540	126	387	619	0	62	177	348	520	436	474	0	704	222	84	225	700	1979	1902	1368	1201	1653	359	621	398	1193	1624	1183	0	561	1168	672	315	722	1238	1467
3.84	985	373	0	483	696	111	0	27	579	440	718	455	677	595	231	253	620	120	26	154	703	560	449	708	0	677	336	312	373	712	1797	1669	1403	1138	1792	464	618	539	1183	1601	1156	216	550	1410	785	393	799	1291	1759
4	924	666	252	659	580	283	0	108	605	761	806	556	758	712	104	417	488	173	0	113	816	461	317	614	0	882	444	306	235	789	1895	1861	1345	1427	1590	380	702	649	1214	1421	1382	157	476	1216	977	593	667	1035	1730
4.16	855	354	373	508	761	342	0	170	788	832	717	711	655	559	110	313	714	226	0	113	847	323	361	418	0	576	525	202	308	724	1741	1738	1531	1435	1199	60	469	794	1573	1202	1137	166	637	1210	971	888	735	1105	1724
4.32	870	57	257	789	763	530	74	29	814	786	772	750	889	551	326	526	657	214	278	131	974	372	156	578	0	822	666	78	66	1015	1853	1907	1582	1709	967		484	656	1417	976	1240	188	667	1240	1204	1158	860	1251	1824
4.48	915	212	355	541	726	643	0	153	742	795	505	758	761	361	360	385	399	292	254	137	1045	406	135	821	0	939	644	258	89	711	1900	1393	1590	1849	778		407	787	1414	574	1494	220	741	1472	1056	1191	890	1404	1590
4.64	1078	409	321	619	687	506	34	41	826	915	699	855	882	327	129	502	801	320	161	0	1031	321	272	768	0	726	426	476	142	688	1271	1200	1434	1451	344		343	847	1514	397	1399	431	872	1448	996	897	940	754	1498
4.8	1036	68	287	766	728	570	132	123	794	804	814	1233	600	312	200	759	1063	435	9	121	873	502	170	890	0	840	400	368	54	699	928	686	1485	1570			364	754	1399	306	1287	548	779	1236	1053	889	1352	419	1190
4.96	1269	307	610	798	749	879	222	0	516	723	529	1180	701	525	111	555	1246	158	0	102	821	567	313	621	0	740	475	399	0	773	766	410	1358	1542			302	999	1707	60	1088	703	675	784	818	1022	1641	534	1544
5.12	1025	0	252	680	829	718	0	164	838	695	709	1011	936	485	127	403	913	334	47	0	1036	573	351	460	87	594	542	379	0	709	310	324	1069	1016			244	1088	1787	0	853	722	1036	380	775	1196	1556		1076
5.28	1048	0	190	780	769	593	83	6	895	857	628	865	889	650	0	429	997	272	48	17	1010	523	355	661	106	558	632	257	0	516			689	559			233	830	1194		665	728	548	518	223	1225	1542		942
5.44	820	91	12	428	623	594	52	0	910	578	474	883	639	402	9	227	1005	148	66	0	1125	293	309	644	139	0	329	187	0	376			464	402			49	913	1168		334	794	245			1417	1173		1148
5.6	760	31	25	579	709	757	0	0	889	351	311	954	595	364	0	391	1071	103	0	0	934	939	213	733	37	0	588	210		301			137				16	796	1133			1058	243			1313	1174		1016
5.76			164	532	566	658	67	0	1035	273	245	881	686	203	297	320	904	70	115	0	1047	742	0	229	0	0	768	80		221							0	806	714			775	107			1349	657		455
5.92			50	239	456	566	0	110	949	7	246	692	530	167	212	174	1026	68	0	0	790	552	0	376	0	0	467	175		227								473				693				979			387
6.08			24	352	366	419	0	0	565	0	259	447		114	277	9	886	0		0		493		73	0	0	358	0										231				795				692			177
6.24			59	157	476	521	0	0	308	0	0	532			126	44	389	0				592		136	0		127											7				811							295
6.4			118	167	298	385	0	0	256		30	395			90		245	0				350		0	77		0											0				667
6.56			67		252	275	0	0	0		0	257			0		11								0		0															630
6.72			27		175		0	0	0		0						0								0																	380
6.88			0		0		0										0								0																	324
7.04			0				0																		0																	103
7.2			0																						0																	0
7.36																									0
7.52
7.68
7.84
[truncated: 189 more columns]
