# Supplementary material for: Kinesin-6 Klp9 orchestrates spindle elongation by regulating microtubule sliding and growth
Source: eLife. 2021 Jun 3;10:e67489. doi: 10.7554/eLife.67489 (PMC8205488; doi:10.7554/eLife.67489)
Supplement: Figure 4—source data 2. [file elife-67489-fig4-data2.xlsx]

## Sheet: Figure S4
Figure 4 - Figure supplement 2B - Dis1-EGFP intensity (AU) throughout anphase B progression in wt and klp9Δ
Time of anaphase B (min)	wt																													klp9Δ
0	7020.48	4836.1	4968.81	5818.23	3769.96	2705.13	4200.75	1979.52	3835.28	4530.92	5982.24	4971.78	3672.2	4958.3	4278.09	4318.32	7884.72	5200.36	4820.48	6337.62	4917.9	4042	4271.4	2990.95	1420.02	3442.11	4095.3	1297.96	2326.75	5940.5	4132.3	3677.8	3889.35	4338.45	5168.8	5631.6	4654.02	5730.56	4242.12	5121.93	3408.56	3207.6	4946.5	2515.5	6506.08	6593.4	3259.16	3679.2	3504.48
1	6188.36	4327.05	4878.44	6058.8	3002.46	2586.51	4101.16	3372.12	4298.54	5215.89	6342.24	6418.61	3559.35	5305.17	4022.37	2952.54	9363	3679.07	4821.6	5293.97	4360.16	3642.53	2295.18	2420.03	2072.14	1608.54	2624	2332.44	2605.2	5542.08	4592.7	3923.6	4264.49	3317	3672.76	5372.66	5051.61	5367.12	5330.26	4241.15	2529.02	3491.14	7146.3	2744.32	7294.17	6455.45	3361.95	4712.4	4362.2
2	6417	4789.72	5134.86	6686.28	4086.82	3081.69	4887.65	3531.84	4221.98	6729.7	6557.2	4698.63	4842.24	5044.49	3985.9	3725.28	10877.5	3780.81	4968.05	6718.14	4613.52	4617.2	3081	2557.69	2461.6	2953.34	2673.56	3195.09	2417.36	5738.85	5583.44	4821.84	5454.56	3939.6	5662.1	7871.16	5150.88	5278.5	7717.06	3644.95	3573.96	3125.26	6083.04	2804.75	7469.16	5863.68	2769.92	4840.75	5155.4
3	6422.6	6715	4965.46	7642.88	4148	3013.65	5025.39	3858.4	4410.48	7041.6	6672.53	5883.36	5730.48	6090.53	5096.4	6075.63	9460.16	4043.96	6591.75	7280.08	5289.6	4629.66	2588.08	3452.87	3358.52	2499.36	2800.98	2298.96	2269.76	6757.57	4819.66	5164.25	5169.15	4012.8	5646.18	8273.16	5836.38	6017.72	6226.54	5505.36	5538.69	4059.38	7092.19	3333.3	6978.51	7423.68	3427.8	5922.96	4259.58
4	7507.15	6874.56	4675.61	9380.38	5198.62	3070.4	4090.91	4711.7	4904.5	7106.68	9100.14	5363.18	5353.63	6720	5219.5	6716.46	9906.6	4750.76	6908.94	7600.6	6805.04	5491.24	3332.32	2992.08	3696.6	3292.8	1789.35	3562.65	2900.34	6966	6139.7	5228.37	5161.6	4780.8	5868.72	7379.19	6626.52	6824.96	6166.56	6700.26	5477.56	3673.6	7405.95	4077	8323.97	6594	3781.14	4845	5696.73
5	8113.23	8879.08	4387.02	14495.4	5002.76	4182	5932.08	4720.26	5209.6	10502.3	8601.12	6482	5411.79	8472.8	6701.19	9288.1	12092.6	4188.2	7341.6	8792.38	5834.22	6764.61	3066.81	4108.68	2709.24	4351.28	2826.88	3844.42	3050.64	7484.4	7365.54	4964.8	5842.56	6775.52	5856.2	6431.68	6415.68	9173.52	6382.77	4558.8	6611.75	4552.8	6967.46	4650.68	7472.96	8021.4	3563.2	6343.4	6125.73
6	8828.58	7594.84	5853.69	9784.5	3695.64	5155.84	5583.24	5289.4	5341.8	11785	9803.16	7608.15	7233.24	9551.64	8397.4	10591.4	11908	4784.7	8451.85	9670.4	7721.49	8184.44	3282.63	3718.4	2309.61	5086.8	3926	4624.4	3154.16	8791.74	7194.33	6081.14	7247.1	6734.83	5822.28	7185.46	5864.16	7705.5	5785.92	5296.35	7264.4	5577.85	8299.2	4888.4	8183.35	8973.84	4582.32	5490.45	6025.8
7	9337.8	8368.03	4917.29	10850.8	5605.75	5266.14	5363.82	6838.29	5883	10370.4	11969.3	7628.4	8061.5	9666.8	8629.55	7723.44	12369.7	5955.53	8422.92	9568.8	8764.98	7342.28	5232.3	4506.88	4391.53	5244.48	2448.29	4448.15	3179.88	10751.7	8948.87	6334.77	6666.66	6635.84	5476.82	7181.65	7155.4	8672	6787.76	5189.28	7251.44	6715.8	8518.02	5353.5	10425	8832.52	5038.4	8152.4	6170.76
8	9543.2	10730.8	4740.74	10133.3	6876.48	5597.28	5384.53	6655.7	7599.3	10602.9	11217.1	9377.1	6712.84	9010.38	8503.67	7510.24	12404.7	6919.2	9331.74	10502.8	8573.25	8621.72	3983.1	4686.71	4834.06	5732.1	2057.16	4477.16	4221	8800.92	9550.3	6025.47	7512.45	6154.89	5317.9	7517.76	7672.28	9438.84	6894.25	5794.77	8002.26	6907.12	9152.44	4994.76	11070.8	12495	5718.3	8023.08	7126.23
9	10667.5	10171.2	7085.28	9669.6	6475	5553.3	5146.7	5468.87	7078.5	9670.32	13220.9	8169.03	5668.08	10837.5	8025.6	8003.84	15705.8	7241.28	9847.44	10250	8860.5	8317.16	4945.09	6959.7	4086.82	5421.68	4008.42	5402.85	5926.48	9124.76	11005.5	7198.38	7933.64	7388.2	7078.08	8943.07	8386.24	7423.56	7939.38	7139.23	6961.68	6467.76	7462.5	5064.93	10103.6	10691.5	5033.6	8715	6384
10	11390.5	8699.7	7482.85	10049.1	7350.68	4490.96	5789.7	4812.61	7997.09	10912.3	11280	8037.36	7518.42	12339	8057.5	9369.99	10864.1	7276.2	9050.36	10843	6708.95	8611.92	4937.35	5598.72	4511.36	6184.34	4444.75	5413.14	4666.83	10293.9	11846.3	7171.76	7247.57	8251.3	7650.8	7988.3	9193.75	7829.64	7134.08	7807.11	7855.76	6239.94	10632.4	5263.2	10941.5	10702.6	4446.86	7469.25	7107.1
11	13394	7591.18	10223.9	9001.81	8070.12	5027.4	6172.2	4648.8	6646.31	11009	12019.6	8017.58	6622.35	10522.8	8574.9	7759.6	11227.4	7274.4	8540.56	11039	9492.28	7039.58	4883.2	6686.64	6646.8	5864.54	4248.48	4671.52	5595.9	11028.1	10282.8	8600	8186.4	7584.72	8704.49	9183.91	8471.64	9792.46	6790.18	8112	7986.6	6927.3	13692.8	5342.75	12057.6	10900.5	4546.32	8637.73	8109
12	9651.43	8934.04		10269.3	5771.26	5886.36	8096.47	5885.58	7343.76	9043.65	11236.7	7912.26	3975.48	9817.08	9307.3	9257.96	7524.96	7410.44	8966.1	7186.56	8542.53	9323.35	5054.04	6748.8	5137.72	8944.5	3905.07	5733.77	4569.51	12461.6	10188.8	8389.26	7121.9	7674.96	6778.8	10002.2	10252.1	9378.3	8604.68	8423.97	8251.26	6058	12136.5	6272.28	12421.7	9662.85	4566.81	8079.84	7771.31
13																														12635.5	11590.8	7436.34	6519.19	6640.2	8247.04	9890.54	9919.36	7470.75	9359.34	8181.42	8843.15	9122.4	10698.2	6512.64	12202.6	9940.21	4888.52	8993.25	7798.53
14																														10658.7	11483.1	6400.46	7405.02	7812.32	8740.76	9728.32	8755.2	8659.2	8469.12	9650	8808.28	8851.14	12405.5	6698.93	11521.5	11356	5058.96	9156.32	7467.57
15																														9397.17	11841.2	7428.35	7900.2	9547.2	7489.35	7817.76	9947.7	9818.82	6128.64	9604.32	8152.29	7858.87	9692.21	5927.6	11257.5	10605.1		9310.56	9288
16																														9859.32	10337.7	7326.34	8803.08	6909.84		4993.8	9432.16	7652.25		8048.82	7875.62	7535	9854.28	7454.16	12110.7	11723.7		11525.9	7038
17																															11748		10299.7	7280		6629.05	9335.46			8603.84	8032.64	6540.75	11969.7	5296.16	13778.8	11157.1		9460.23	7372.12
18																															10366.1		6190.4				7301.04			7726.81	5152.35		12340.3	6331.65	13702.3	8577.84		8835.46	7038.04
19																															7042.23						5940.1			7812.35				6385.5	13949.1	7911.12		5937.32	6624.8
20
Figure 4 - Figure supplement 2C - Intensity spectra of Dis1-EGFP along the early anaphase spindle (t=1)
Distance (µm)	wt																														klp9Δ
-4.96
-4.8
-4.64
-4.48
-4.32
-4.16
-4
-3.84
-3.68
-3.52
-3.36
-3.2
-3.04
-2.88
-2.72
-2.56									1229										2440					881						831								205
-2.4					122				2613	1455			1005						3045					1543						893						1389		665								0
-2.24		819	756		814			282	1366	1842			3239		2024	1527			1861	1857				2196			830			1286				2511		1838		1573		224			873	1842	1002	1086
-2.08		1002	2501	0	1487			783	738	783	960	1683	3857	0	2472	3229		912	1460	3229		15		2888		1665	1828		217	2772	559	1610		3300	551	1337	569	1850	1083	452	377	5273	1769	4166	2776	1224		2336	2056
-1.92		1561	3971	704	1197	584	1061	1539	275	474	1023	1887	2529	0	1952	3585		2082	1299	3343		993	1159	2449	1580	3605	3087	1252	844	2981	834	1809		2740	1615	371	1231	1631	1474	554	1721	6138	2670	6389	3714	1540		3801	3224
-1.76		1978	2868	1858	524	623	1355	1391	415	244	2505	2254	1154	331	1626	2304	2139	2777	1896	1582	540	2246	1579	2311	2596	5716	3233	1474	1950	2316	1679	2404		1219	1679	232	1227	1267	1992	495	4854	3477	2563	3589	2572	633	983	3911	2940
-1.6		1483	1160	2573	380	974	2221	893	67	107	2786	1858	661	996	1704	1074	3561	1664	2295	653	1275	1816	1861	1749	2986	4780	2128	1531	2075	1746	3355	1896	2002	848	844	190	1110	1261	2216	340	4659	2023	1678	2605	1431	602	1751	3083	1613
-1.44		1292	1089	1978	267	1167	1560	632	315	0	2452	1777	450	1128	1562	929	3603	1115	2355	408	2594	913	1576	1315	1717	2508	1367	1338	1273	1129	3775	1094	2750	759	393	213	858	1118	1523	487	2765	1243	1062	1781	934	289	2757	2382	982
-1.28		532	463	1182	191	733	1142	409	212	0	1801	1678	380	926	1552	822	2228	905	2180	730	3089	320	1720	829	1085	1731	852	1011	967	1003	2958	804	2843	855	453	287	848	1362	635	961	1638	1048	871	1590	1164	267	2259	1508	924
-1.12		648	285	1090	119	358	1200	578	72	320	852	1219	675	687	1555	1053	1263	321	1978	480	2847	99	1468	865	696	1409	395	787	740	911	1829	730	1776	649	287	0	1112	1383	180	1122	1362	763	706	913	1333	423	1038	713	700
-0.96		773	562	986	0	817	937	803	513	239	838	1312	561	553	1450	1325	834	529	1120	320	2525	198	1277	523	726	712	532	628	711	1110	1633	682	1300	266	156	27	981	884	406	607	1691	522	837	695	1092	322	544	1085	584
-0.8		1371	898	496	63	574	892	506	302	328	448	1051	585	1012	1283	1093	1454	300	943	566	1565	0	715	774	266	1100	518	481	693	890	1349	1133	918	517	0	410	272	356	252	178	1551	827	661	480	1289	-67	756	427	866
-0.64		831	665	802	0	770	696	490	251	160	765	557	492	1419	680	706	1194	396	874	326	1338	0	238	1194	490	1027	770	424	1222	486	1776	730	738	509	0	107	254	60	200	94	1091	302	400	756	1036	318	838	476	360
-0.48		1055	417	941	62	930	910	349	605	205	673	822	392	1717	641	1270	1016	185	905	158	976	0	5	878	415	1113	877	414	1421	690	1663	820	740	683	0	0	0	227	722	184	1172	957	489	644	745	73	729	579	467
-0.32		831	369	973	92	446	743	106	217	193	579	578	315	1533	819	949	1051	442	533	96	830	238	0	605	456	1458	584	315	964	648	1613	1123	542	554	0	0	0	21	1009	127	762	365	715	821	1258	92	495	511	225
-0.16		581	467	565	160	600	606	52	55	361	522	858	752	2054	722	642	1130	585	452	350	1185	215	0	630	607	1590	316	272	1092	458	1389	550	555	497	0	0	0	0	639	152	1297	146	625	1040	1284	443	658	563	521
0		254	752	804	0	679	720	256	149	317	485	1237	339	2569	301	413	933	721	373	400	1376	220	172	510	300	1581	537	275	1054	751	1121	441	549	268	222	28	0	825	283	242	1405	273	419	670	1553	61	461	706	414
0.16		421	734	768	316	345	561	195	188	449	666	976	85	2462	665	617	1294	679	464	214	1557	140	299	483	159	1220	392	277	585	671	1260	419	494	475	404	0	46	954	702	348	989	0	640	352	1393	134	1015	607	427
0.32		306	610	776	131	302	632	139	875	583	599	1276	347	1425	362	379	1120	1012	566	255	1499	272	604	0	98	971	654	284	1013	928	1282	501	535	619	81	0	-89	682	623	91	754	475	712	264	1088	0	539	325	485
0.48		175	586	965	452	15	413	190	832	649	803	966	170	1487	484	313	1177	933	378	-75	1150	162	257	100	600	1167	775	205	965	433	1360	907	1083	639	180	8	-83	44	315	140	1107	528	391	100	1629	95	410	137	367
0.64		201	434	988	504	0	598	454	817	677	752	1060	243	1329	667	274	1323	822	368	235	1503	553	478	83	621	1535	789	163	1266	836	1511	758	1205	772	407	169	137	0	369	231	1267	58	321	88	1588	122	398	153	468
0.8		992	710	1038	435	646	521	275	622	890	924	910	748	1350	446	214	1635	1054	99	280	1368	852	642	61	579	1240	775	350	1559	892	1638	813	1602	578	425	146	106	0	663	349	1267	624	528	448	1207	446	447	0	807
0.96		1096	201	890	176	740	589	266	1045	935	1024	563	402	1239	844	95	2100	959	171	372	1671	936	673	508	348	857	1289	678	1413	675	1631	1192	2652	592	549	0	0	0	554	187	1220	290	711	314	1677	666	556	199	999
1.12		1141	818	948	256	1322	494	488	686	986	1034	961	388	612	932	600	3831	947	169	587	2941	787	683	642	303	832	1235	1238	1830	785	1620	1728	3870	396	607	0	0	20	584	224	1276	396	619	422	1302	621	737	362	1251
1.28		402	694	876	302	1912	1019	687	908	1073	1373	1802	433	694	1110	671	6028	1478	594	792	4496	1114	1009	793	957	1110	1655	1964	2979	897	2012	1482	3548	970	1041	496	0	396	950	357	1731	978	981	610	1625	575	1377	10	1095
1.44		423	864	1993	574	2409	1539	1111	838	1066	1362	3509	1028	1108	1337	928	4868	1943	685	1291	3452	1716	1100	821	1643	2373	2460	2367	4071	1416	2726	1445	2072	1836	1989	771	259	380	1125	539	2619	2055	1156	944	1680	590	2057	787	1696
1.6		393	1669	3263	739	2145	1730	1029	1210	1456	2320	4723	943	731	2438	1440	2686	3336	922	2343	1415	2248	1114	1391	2701	3596	3481	2477	3247	1449	4135	1844	1689	2255	2363	1293	895	700	1759	1219	3870	3011	1742	1509	2482	1041	2224	980	1412
1.76		863	2680	4672	2000	1023	929	383	835	2214	3530	3617	1522	921	2296	3702		4090	1538	3282		2278	333	1388	1942	3698	2996	2362	1901	1789	3956	2517		1772	1183	1549	1884	785	2177	1926	7456	3570	2316	2086	3390	2140	1155	1089	835
1.92		1384	2263	3784	2382	740	113	240	1746	3190	4036	1471	2593	0	1088	4259		3364	1453	2752		2135	0	1526	792	2448	1728		1250	1394	2596	2964		1405	394	913	1521	950	1474	1511	8262	1337	1686	2065	2537	2504		1788	724
2.08		1737	899	2114	1304			0	2903	2796	3524	794	2930	123	282	2169			1661	2013		1634		2233			1370			299	1474	2005		831		73	496	784	945	604	4937	496	969	807	2665	2686		1932
2.24		1276			442				1850	1507			1734			424			1368					2991			797			164						0		361							1759	1560
2.4									699	789									746					2537						463								0
2.56																			21					1008
2.72
2.88
3.04
3.2
3.36
3.52
3.68
3.84
4
4.16
4.32
4.48
4.64
4.8
4.96
5.12
Figure 4 - figure supplement 2C - Intensity spectra of Dis1-EGFP along the late anaphase spindle (t=2)
Distance (µm)	wt																													klp9Δ
-8
-7.84
-7.68
-7.52
-7.36
-7.2
-7.04																																				0				2833
-6.88																																		0		266	0			4343
-6.72																									518									0		1276	0			3747		0							0
-6.56																									687									0		1767	0			1755		371							0
-6.4																							256		1354						1299			0	0	700	673			446		918							343
-6.24				0		549		368															413		2694				620		1819			0	78	420	414			274	1676	2021							575
-6.08				339	2492	794		837										827					1035		3115				1152	3030	2974	1304		169	438	192	0			451	3225	3120	104	965	828				682
-5.92	1103			833	3370	692		1104										1259				0	1249		2014				1067	3566	3835	2106		427	1223	703	0		360	1121	4491	4211	685	1208	1050	1204	1924		1185
-5.76	832	275		803	3326	356		921	496									1481		140		1	1551		1269				1724	4524	3857	2153		1532	1285	573	0	0	776	1479	5020	3578	1733	1469	701	1689	2311	549	779
-5.6	740	557		698	3307	474	1309	1099	1346									1275		1059	0	0	1483		1080				1458	4720	2721	1522		1884	803	494	131	88	1157	1435	5226	2723	2673	1561	410	1286	3280	553	168
-5.44	2156	1657		734	3383	566	1954	709	1586		3064	2350	252	1825			659	935	1042	2160	556	397	1778		823			1665	979	4731	2154	1150	194	1326	280	389	182	377	1117	1239	3488	2326	1857	1949	44	540	2787	1106	0
-5.28	2049	2589	1725	642	2867	662	2653	520	1712		3332	2383	446	2398		1626	1623	1140	1608	2174	1344	762	2115		1040	561	778	2272	695	4511	1276	805	324	319	19	558	188	400	878	1566	2715	1496	1604	1398	587	444	1689	1397	0
-5.12	1881	2356	1734	587	2106	471	2172	439	1214	428	3193	1802	1429	2790		1988	3171	1603	2165	894	1477	1747	2055	1752	682	1063	1212	1200	667	4305	597	613	1038	254	170	385	200	236	716	1421	2654	1091	1529	1550	521	582	1326	1608	83
-4.96	1748	2018	851	288	1647	642	1799	651	775	913	3222	2037	1986	3592		1231	2214	1461	2141	0	1420	1350	2211	1301	400	1786	1349	821	842	4398	712	388	1585	288	0	363	253	134	655	1620	2822	1308	1179	2372	769	681	1112	1232	66
-4.8	1658	1387	746	389	1140	794	1474	672	240	948	3052	2075	1989	3222	1261	898	866	1901	2400	0	645	902	2016	529	823	2329	1719	641	916	4552	781	493	1332	177	0	74	88	450	647	2709	2419	989	1102	2589	1002	1053	997	917	175
-4.64	1534	773	423	168	1059	516	1362	450	142	1185	2898	1866	1306	1694	1928	1344	752	1500	1794	0	10	746	2159	184	635	2013	2025	589	1125	4478	852	109	761	385	0	239	0	765	581	2802	1740	945	598	3349	1295	586	1010	756	350
-4.48	1157	617	547	217	1085	351	1415	566	100	1089	2667	1663	760	1665	2538	2179	728	1366	883	0	0	1037	1996	68	918	1976	2099	988	815	3777	693	359	646	826	0	370	0	1162	576	3143	1517	811	69	2907	1815	646	832	748	0
-4.32	819	47	757	394	789	245	1110	508	215	2661	2120	1693	401	1460	2171	2717	595	1398	818	0	0	1340	1617	77	1399	1965	1838	1077	1072	4355	880	467	350	1110	0	221	0	1202	680	3179	1247	473	174	3216	2001	234	485	588	456
-4.16	1219	-66	831	663	326	237	1325	794	0	3527	2334	1535	486	1128	1663	2198	904	1610	1042	0	0	1164	1018	6	1440	1275	1072	226	1104	4261	1104	566	739	476	0	214	0	1322	690	2801	1066	342	-20	3169	2294	355	895	622	751
-4	796	79	784	582	257	312	1264	452	0	2715	1940	1250	592	964	946	2016	1163	1292	305	241	0	925	1146	0	1378	1597	734	505	795	4213	689	659	1167	0	0	215	38	1020	364	2860	942	202	-80	2593	2312	376	877	858	736
-3.84	1042	1	672	626	330	597	1195	526	247	2577	1198	1155	792	1245	1320	1804	900	1031	428	224	0	604	1002	0	1709	2127	698	454	1270	4155	857	798	1436	14	0	462	125	1093	435	2792	452	76	-56	1578	2175	230	801	910	489
-3.68	916	238	1221	1016	561	518	1259	491	454	1794	932	1030	1107	1348	1046	1268	723	351	696	374	0	424	360	0	1426	1922	392	168	1003	3790	670	895	1331	0	0	49	277	1139	440	2337	303	35	-282	1215	1359	236	971	745	684
-3.52	671	51	1078	751	573	280	1342	250	503	1486	852	1490	1200	1131	1009	1005	782	437	276	0	0	466	458	402	1180	1459	78	924	701	3372	870	999	822	0	0	0	555	1024	183	2104	43	247	179	469	443	149	1313	817	61
-3.36	791	323	1064	365	515	395	676	390	922	1013	360	1024	1311	1163	1066	476	1061	686	276	0	0	671	184	492	1123	1294	234	1359	887	3425	885	1077	699	0	0	0	464	1029	156	1803	178	499	-341	426	258	531	1129	1108	0
-3.2	739	523	955	470	497	417	540	130	1724	638	664	703	1301	1458	1135	651	983	582	839	0	0	679	485	480	856	1400	159	1248	804	2997	636	1049	532	0	34	0	641	742	264	911	130	235	-140	60	1	899	1351	1100	0
-3.04	355	474	1121	158	290	846	586	368	1480	727	640	614	1271	1518	1080	626	801	451	969	0	0	339	847	625	1179	585	287	1013	782	3068	900	757	668	0	382	62	359	644	443	474	0	507	-112	0	330	713	782	1025	0
-2.88	121	590	994	0	147	478	798	527	1802	933	512	741	1504	2166	1283	624	974	690	666	0	0	582	731	339	1106	899	442	666	1377	2979	708	539	546	0	285	181	301	650	38	352	0	203	-162	11	324	898	812	1285	0
-2.72	221	775	1104	0	401	466	870	612	1494	1095	236	864	1906	1953	975	905	1352	868	91	0	0	531	811	808	740	1162	237	288	1249	3122	302	612	608	0	54	289	211	977	89	560	203	418	-281	0	266	631	509	1053	0
-2.56	233	507	1063	101	399	1286	648	573	1163	1111	231	1040	1746	1914	886	762	853	540	185	0	0	563	648	664	448	778	565	159	1103	3091	385	1076	635	148	73	17	95	1092	170	530	345	290	-94	0	-9	513	90	1048	0
-2.4	113	348	1180	0	488	1293	822	492	795	1242	477	1068	1355	2078	1231	379	778	607	233	0	0	830	493	716	492	1044	334	32	980	2804	278	676	452	274	383	0	0	628	323	372	277	258	-84	102	-90	571	85	991	0
-2.24	253	395	1134	19	650	850	401	449	643	1385	382	630	1035	1670	1120	381	1054	769	379	0	0	790	605	763	643	982	453	188	379	2946	36	357	615	98	276	0	0	597	71	726	0	482	-286	0	184	192	0	717	0
-2.08	202	266	1397	36	612	506	431	512	491	1928	300	756	868	1549	777	187	1060	965	370	0	0	733	274	560	524	471	481	88	0	2811	0	103	682	140	124	19	0	557	267	546	38	584	-197	0	375	311	181	495	0
-1.92	114	311	988	0	296	969	524	242	462	1800	665	856	722	1196	834	631	882	1211	137	0	0	338	368	321	523	499	887	28	219	3112	0	152	279	220	406	185	417	629	220	714	133	389	-164	0	233	400	190	405	0
-1.76	18	394	727	30	248	645	472	142	643	1770	515	762	379	895	672	626	203	956	237	0	0	890	640	589	479	563	657	52	0	2961	0	52	321	80	403	199	0	857	1	881	142	249	80	72	-80	562	506	375	0
-1.6	119	131	783	304	362	630	716	242	434	1971	447	781	118	1047	961	613	218	578	-21	0	0	1215	479	637	555	485	626	304	162	3164	0	218	620	0	341	220	0	628	154	734	10	489	-25	222	-2	386	131	378	0
-1.44	212	281	633	311	0	517	819	454	285	1421	694	820	306	808	1103	670	349	595	154	0	167	1389	869	429	571	839	261	724	210	2957	0	119	467	0	456	229	14	718	17	649	212	512	-296	0	-10	467	459	175	177
-1.28	154	466	596	90	150	918	390	658	102	1352	796	1117	243	1143	1115	353	22	587	285	0	377	980	443	669	1082	751	495	1503	218	3025	93	0	236	0	260	103	171	1012	0	915	190	623	-374	147	-317	338	727	301	170
-1.12	0	783	0	240	170	910	586	729	44	794	976	759	288	995	997	316	0	806	395	26	263	930	371	641	660	838	411	2354	201	2972	8	0	85	0	435	184	0	895	0	574	235	103	-25	324	-415	213	540	2	0
-0.96	0	444	85	41	119	552	575	828	289	595	1026	799	446	1350	929	672	276	705	1093	364	339	569	385	668	762	986	290	2116	239	3063	162	81	58	0	80	0	0	512	136	860	175	159	-129	574	49	188	84	278	145
-0.8	0	578	399	0	508	400	819	915	188	981	1442	705	47	1288	600	666	237	822	710	490	248	500	614	575	608	864	371	635	307	2908	6	36	260	0	5	82	0	278	0	672	24	0	-17	466	221	421	123	292	244
-0.64	150	407	447	212	338	331	1228	726	249	1082	1983	787	314	1625	410	681	0	619	643	735	199	587	656	520	965	604	340	0	539	2744	46	347	695	6	136	0	0	524	0	825	0	0	94	426	356	232	0	191	82
-0.48	113	112	541	246	191	438	1174	736	536	811	1663	859	522	1307	809	236	347	461	315	808	561	741	720	378	983	747	201	0	624	3053	0	377	570	0	362	0	0	0	0	429	0	0	57	136	323	472	241	219	0
-0.32	375	100	725	-40	90	434	886	923	306	328	893	848	581	721	860	248	417	259	393	905	0	606	849	72	795	380	403	33	299	3200	0	494	783	0	352	0	0	0	0	622	0	0	-146	39	317	121	339	142	219
-0.16	503	181	889	251	270	417	774	947	494	578	768	677	712	785	756	61	691	293	577	826	0	761	607	336	737	757	436	0	175	2976	66	552	1087	0	445	0	142	212	0	383	80	0	-499	106	229	0	166	298	0
0	465	123	932	388	188	534	768	971	393	246	729	404	947	783	852	181	936	295	486	517	0	424	644	452	889	516	396	184	300	3337	92	576	916	0	338	0	262	0	0	289	410	0	0	243	218	0	275	666	123
0.16	488	221	745	343	0	410	717	1013	836	329	691	321	1022	1215	799	339	1014	402	765	241	0	456	879	461	593	760	100	54	405	3091	0	766	559	0	75	0	212	0	0	410	630	149	-194	414	-7	14	480	564	0
0.32	189	38	937	3	0	514	448	790	925	318	481	460	846	1179	389	393	675	276	469	190	88	476	547	382	878	547	331	402	628	3245	0	503	287	0	311	0	433	125	0	85	695	379	-120	94	84	0	298	338	148
0.48	66	584	957	71	0	766	311	805	1156	563	496	631	903	926	607	120	317	263	123	0	352	642	265	374	793	265	200	298	582	3122	65	386	156	275	54	0	143	0	0	143	647	331	-176	0	16	29	139	330	206
0.64	97	656	953	33	0	866	319	977	1009	485	337	560	802	359	577	439	178	234	595	100	374	435	364	12	725	462	244	838	599	3035	103	352	0	314	335	134	0	0	120	218	425	164	-44	287	157	272	27	240	176
0.8	234	617	1077	50	103	643	363	769	944	691	449	341	745	195	617	356	298	64	312	277	671	634	467	108	439	648	351	636	175	3066	470	323	0	107	545	71	32	0	117	516	397	0	339	0	215	0	101	522	223
0.96	62	261	825	0	4	605	570	782	1195	869	267	36	1021	623	1017	570	125	43	359	0	1074	1006	342	43	245	503	1054	890	356	3435	245	270	0	0	165	-43	0	0	136	784	460	0	630	0	359	0	0	559	0
1.12	0	577	1065	127	248	595	568	756	956	686	289	149	650	763	800	369	105	0	299	319	1131	807	689	152	335	433	1245	1189	352	3275	422	783	0	0	137	105	0	0	131	190	444	0	867	0	579	0	24	403	23
1.28	0	373	1125	303	115	95	580	870	967	937	183	149	469	677	739	337	134	134	76	519	850	705	542	209	473	252	1496	1100	643	2989	326	506	0	0	154	322	413	0	0	307	326	0	662	79	556	0	68	187	180
1.44	0	304	1007	246	145	0	607	866	482	612	64	140	464	756	838	473	398	333	-67	254	1061	0	545	341	976	510	1392	599	607	3341	351	542	43	0	123	308	144	0	0	590	183	0	744	101	435	0	124	172	384
1.6	114	443	855	300	515	0	424	779	386	941	138	182	693	558	949	348	531	398	396	92	1354	0	444	332	953	214	900	626	367	3545	226	834	464	0	217	368	523	0	91	935	0	0	376	99	598	144	806	320	556
1.76	0	465	965	521	267	0	485	606	372	1006	658	311	660	846	565	541	526	0	174	323	1106	0	410	529	715	80	494	553	455	3424	148	754	650	0	168	0	187	0	129	519	0	28	172	322	342	105	822	0	159
1.92	0	226	1026	272	121	0	508	369	394	959	280	429	703	379	654	748	42	0	425	0	1368	0	269	831	786	565	141	640	676	3740	584	910	1037	0	257	0	0	0	248	341	6	0	631	458	513	545	526	12	255
2.08	0	434	1105	487	439	9	341	178	270	1019	598	355	881	419	1068	746	250	135	607	98	1847	0	414	620	596	573	11	943	517	3794	1010	1118	1389	0	301	0	104	0	138	0	0	0	694	577	983	553	523	521	263
2.24	17	461	741	513	192	62	433	89	212	1393	946	569	1135	383	1525	827	297	216	155	227	1976	0	717	788	556	516	219	1471	320	3600	1123	880	1167	0	61	0	54	0	364	66	0	0	266	551	1047	673	238	198	300
2.4	10	493	939	499	413	0	411	148	587	1307	782	1104	1234	603	1022	953	0	231	158	0	1944	0	572	898	705	497	174	1811	619	3262	922	1662	1240	0	209	0	0	0	277	258	110	0	418	279	1471	833	239	345	395
2.56	0	549	1237	538	600	0	589	29	900	988	658	771	1271	776	265	1018	0	125	570	0	1938	0	714	869	658	171	235	2034	12	3377	1264	1835	970	0	99	239	0	0	168	797	167	0	1373	297	1147	529	321	558	516
2.72	3	458	1650	471	825	0	409	128	635	1341	1023	726	1217	860	305	1061	0	0	99	0	1535	94	685	1266	900	859	718	1972	0	3426	1095	1952	1047	0	14	320	0	0	260	1404	0	0	1404	571	1551	640	174	441	497
2.88	0	295	1936	535	508	0	472	215	625	1529	913	742	1493	568	538	855	209	248	97	187	1487	172	377	1519	736	450	318	1639	285	3200	1137	2221	597	317	95	348	0	0	285	2003	39	28	1126	228	2457	702	0	263	415
3.04	105	267	1663	764	869	0	435	178	638	1191	1251	162	1879	354	234	882	673	544	843	456	1587	166	561	1458	723	594	91	2068	181	3594	1295	1976	378	235	76	570	0	0	0	2313	347	216	450	425	2175	275	0	416	506
3.2	137	526	1209	489	1048	0	429	208	564	1443	1650	331	2013	230	158	683	547	660	689	614	1516	0	452	1259	945	831	0	2281	115	3711	1399	1927	292	437	0	280	0	0	0	2500	229	351	435	409	2179	90	214	521	465
3.36	434	282	1152	437	989	0	380	205	648	1313	1811	210	2423	425	220	965	628	341	729	1015	1487	290	594	1475	950	1039	0	2361	449	3595	1119	1614	171	353	0	608	24	0	293	2254	190	288	945	755	2233	178	101	864	650
3.52	174	503	1470	363	649	0	483	110	676	1075	2079	551	2240	505	158	917	777	0	283	911	1283	331	530	1141	954	1264	0	2296	806	4026	493	1311	0	503	0	124	0	0	504	1952	0	446	1112	1019	1781	325	765	985	1078
3.68	135	674	1284	679	486	0	383	225	479	920	2238	670	2131	441	380	176	1108	0	384	648	1344	310	843	1272	588	1068	0	2611	604	4184	322	1008	54	555	311	486	135	209	897	1664	0	730	1140	1413	1112	61	1224	707	852
3.84	0	760	1284	495	487	79	560	448	411	1359	2842	1249	2175	576	370	565	1377	0	750	810	1234	81	1346	1056	829	1420	0	2344	1010	4516	72	457	0	671	692	829	255	158	1244	1762	345	1003	1567	1630	1087	249	1420	659	562
4	0	1018	1181	437	621	693	629	576	28	1223	2750	1494	1525	1017	293	828	1531	0	744	1189	1219	85	1076	669	627	1373	0	2580	900	5073	0	43	0	701	965	485	95	593	1210	1574	871	1246	1100	1262	1183	393	1587	471	786
4.16	131	1051	526	187	759	728	734	727	0	1162	2867	1182	1346	665	551	842	1844	0	799	1069	1446	284	978	875	531	1880	0	2723	909	5094	0	0	0	1144	1058	504	445	925	1371	1459	1193	1246	1373	1726	1299	294	1551	204	1069
4.32	320	1646	529	486	717	924	732	721	0	1221	2463	1323	1096	862	1564	1030	1526	0	678	1505	1876	212	1002	1371	722	2520	0	2261	966	4924	0	0	0	931	948	511	316	1024	1041	1495	1031	1286	1375	1409	1513	425	1736	218	879
4.48	429	2019	737	467	628	1276	748	871	0	1696	2573	2066	916	762	2938	1135	1557	0	356	1636	2124	511	1197	1678	1065	2969	0	1710	660	4906	0	26	0	392	1049	1066	0	1177	1119	2025	902	1242	1146	824	1775	579	1517	594	717
4.64	594	2076	817	0	508	1183	916	916	0	1905	2529	2081	591	1130	2483	1993	1916	0	126	1587	1858	712	1371	1582	649	3825	307	955	267	4910	0	70	0	650	1121	1487	120	1013	634	2562	646	1128	1266	1289	1286	983	1031	468	844
4.8	1102	2247	1120	77	187	1042	643	1073	0	2746	3045	2013	1389	2275	1314	3027	2211	0	387	1389	1738	540	857	1182	903	4132	1154	1321	294	4539	0	171	0	826	996	1767	199	901	674	3055	667	1168	1217	1849	1162	609	307	389	805
4.96	1342	2025	1434	0	0	1730	592	1070	115	2730	2492	1700	1312	2112		2336	2208	19	829	933	1559	661	1292	831	940	2834	836	1762	334	3690	0	491	992	809	454	1496	345	791	1552	3034	1144	1518	1533	1868	1785	766	0	1283	448
5.12	1179	1944	1712	348	0	1769	959	1104	469	2989	1328	1293	1180	1624		1807	1655	547	1480	376	928	934	1057		811	1431	407	1627	65	3384	218	783	1311	911	273	1657	354	1126	1777	2708	1116	1825	2186	1353	1856	1110	375	1859	257
5.28	1521	2454	1000	447	0	1789	834	1155	707		728	1108	1660	731		1341	1515	839	1388	803	779	1357	644		1060	924		1132	326	3881	929	2098	655	918	108	1149	139	1207	1358	3056	1101	1906	2074	1499	2001	1622	949	1344	272
5.44	2145	2428		504	387	854	592	1129	1424		194						1080	367	1132	1201	962	2561	544		1201				277	4972	3071	2397	3	673	542	1052	0	956	627	2792	1842	1914	2866	2900	2746	1825	710	802	157
5.6	2157	1768		443	205	92		1306	2011									0		1110		2445	475		1259				22	6039	2773	1229		63	1342	706	0	902	183	2792	3005	1902	3654	3195	2938	1133	668	518	485
5.76	1565			342	178	0		1100	1666									0				1526	816		1943				216	5525	1990	891		0	1948	736	33		0	2744	3570	1808	2875	2442	2463	380	727	241	589
5.92	930			320	0	0		565										0				618	1591		3283				178	4642	1210	432		0	2022	568	106			1691	2622	2150	2110	1583	1855				589
6.08				55		0		389										0					1660		3575				855	4032	428			0	1326	1058	835			1936	1224	2290	1000	0	0				487
6.24																							508		3962					3000	503			236	532	1329	2056			3589		2856	0						1212
6.4																									2388					2000				990		750	1757			5774		3315							2035
6.56																									1577					1000				872		36	907			5059		3601							1918
6.72																									1216									450		0	539			3325		2000							1244
6.88																																		0		0	298			2144		1000
7.04																																								892
7.2
7.36
7.52
7.68
7.84
Figure 4 - figure supplement 4 - Klp9-GFP intensity in total and at the spindle in wild-type and dis1Δ cells
in total		at the spindle
wt	dis1Δ	wt	dis1Δ
6425.32	9607.26	4788.69	2172.36
6301.4	10456.5	2945.7	2051.27
10081.7	9374.85	4461.43	2232.93
8423.29	11971.4	2813.93	2053.73
10876.9	7139.4	5638.5	927.788
10091.9	5133.87	3206.92	1232.58
5858.56	4698.8	3307.23	777.554
7542.84	4856.32	3938.16	756.107
10103.2	5364.45	4636.1	1247.48
11957.1	12706.9	4826.19	2230.03
13045.1	10534.5	5199.61	1662.07
9445.1	9817.08	4586.42	1905.4
9141.75	9009.24	3576.16	1286.32
9996.8	12076.8	3236.8	2359.8
8313.24	7659.34	4005.72	2112.38
10633.1	12103	4884.32	1558.44
7828.11	12258.8	3077.06	3144.61
7740.39	11895	2738.14	2280.76
4019.4	9371.85	2869.32	3091.54
15657.3	4592.28	4282.43	2133.1
10303.3	8058.72	4165.91	1555.74
11621.6	9879.65	5400.45	1614.79
5519.49	4677.12	3652.8	1626.32
8338.71	12082.1	3214.94	2183.79
7343.8	11767.1	4247.12	2039.59
12823.6	6097.6	3974.72	1588.86
15721	8479.62	5027.06	2626.17
12418.4	7318.5	3867.98	2132.08
6780.17	8015	2074.12	2744.93
6889.27	5306.58	2724.78	2148.21
	11964.5		2215.38
	8862.81		1673.53
	8827.92		1739.12
Figure 4 - figure supplement 5 - Klp9 concentration at the midzone in wild-type and dis1Δ cells throughout anaphase B
	wt																														dis1Δ
0	1.92735	2.54774	1.13543	1.54973	1.88394	1.89328	1.25381	1.38363	1.5023	1.47508	1.85093	1.21118	0.641088	0.785172	0.790127	0.539613	1.19995	1.69162	0.966828	0.66041	0.860057	0.311562	0.518267	0.988809	0.537212	0.874621	0.41972	0.757895	0.563196	0.72343	0.573624	0.559413	0.40667	0.729408	0.932937	0.837835	0.458147	0.613237	0.454487	0.557972	0.658285	0.369037	0.327816	0.353421	0.490973	0.33258	2.44352	0.301121	0.086903
1	2.41512	3.00126	1.10719	1.76709	2.1083	2.36403	1.23641	1.40051	2.66389	1.3374	1.68876	1.34672	0.747321	0.931309	0.630966	0.950653	1.02385	1.426	0.864583	1.51671	1.41442	0.450527	0.842233	0.835614	0.561545	0.829958	0.501587	1.20833	1.37583	0.973096	0.604693	0.541181	0.690202	0.436289	0.810298	0.859573	0.485059	0.554805	0.248433	0.379893	0.750472	0.681279	0.377455	0.480163	0.561808	0.262954	0.655922	0.512476	0.05742
2	2.19218	2.87144	0.923282	1.78536	2.19812	1.77631	1.69137	3.66034	2.08904	1.82262	2.11337	2.1736	1.1517	0.979129	0.64045	1.285	1.44013	2.90724	1.13767	0.971402	1.33411	0.921751	0.82193	0.866403	0.931326	1.66852	0.645919	1.48347	1.90539	0.810758	0.643759	0.939658	0.643147	0.574698	0.743074	0.3913	0.282215	0.487895	0.64664	0.524868	0.667232	0.673376	0.451566	0.530263	0.639945	1.09482	0.773441	0.506759	0.569025
3	1.97264	2.93028	1.13371	1.79937	1.54884	1.20147	1.07179	1.62772	1.96585	2.26909	1.73995	1.63232	1.22309	0.993269	0.980332	1.63558	2.00251	1.69144	0.815851	0.839864	1.88172	1.73679	1.72491	1.10385	1.13624	1.57394	0.919964	1.48383	1.76336	1.25257	1.01622	0.487585	0.624771	0.528039	0.288101	0.309055	0.555794	1.17493	0.394612	0.553204	0.663031	0.589553	0.540441	0.630205	0.641357	1.41225	1.77048	0.956538	0.767923
4	2.07046	2.3809	1.18817	2.81001	1.82835	1.48776	1.42229	1.60808	1.6161	1.55388	1.82316	1.55764	1.40958	1.22866	1.32115	2.06952	2.27883	2.2487	1.58321	1.04637	2.12462	1.41798	1.63678	1.22108	1.31464	1.75022	0.921366	1.79168	1.90694	2.01408	1.28041	0.789073	0.57932	0.925642	1.65115	0.936262	0.911765	0.717085	0.434931	0.628672	0.912086	0.585368	0.745947	0.688744	0.804394	0.863286	0.856669	0.593098	0.63263
5	1.90313	2.60325	1.09852	1.73867	2.37357	2.41587	1.49175	2.08705	2.535	2.04045	1.99728	2.76943	1.75108	1.4576	1.4156	1.78733	2.30923	2.87415	1.7081	1.33003	2.9108	2.18284	1.13377	1.54003	1.23829	3.45478	1.0513	2.07015	2.00434	2.21487	0.609212	0.72987	0.759579	0.53831	1.20567	0.406887	0.202714	1.24839	0.626652	0.526178	0.900598	0.56885	0.504929	1.00625	0.280755	1.77992	0.727923	0.550965	0.72926
6	3.51238	2.75367	1.21426	1.20227	3.07644	3.51785	1.74904	2.16208	3.27971	3.25841	2.68856	3.03777	2.0927	1.53731	1.6359	2.15133	2.79983	3.00924	2.79275	1.51504	2.64153	2.84644	3.23897	1.49229	1.46128	2.87988	1.25271	4.55235	2.90693	3.33879	0.504521	0.671649	0.689652	1.1953	0.9218	0.36364	0.892008	0.489329	0.736134	0.65173	1.00784	0.737464	0.513421	0.653414	0.354452	0.987059	1.32014	0.618291	0.685183
7	2.98039	3.2483	2.03141	2.72327	3.66426	3.57102	2.26596	2.11607	3.82964	3.54693	4.05767	3.03088	3.3273	1.70735	2.08162	2.64559	4.44547	3.64567	2.821	1.73877	4.78976	2.91579	2.79257	1.90504	1.85637	3.47882	1.32786	5.10447	2.99258	4.41925	0.695065	0.682223	0.747696	1.36653	0.717318	0.812785	0.633182	0.461775	0.861206	1.10768	1.14378	0.611987	0.554335	0.876995	0.914892	1.35116	1.00095	1.2342	0.765031
8	4.28522	4.90092	2.60392	2.78725	3.68587	4.00702	2.88703	3.13616	5.66237	5.78913	3.88521	4.02943	2.93704	2.42827	2.11478	3.59206	3.97472	5.51085	3.14037	2.53178	5.79256	3.7408	3.56842	3.42126	2.02542	3.84907	1.33909	4.85575	3.2818	3.75745	0.729732	1.02902	0.571695	1.21482	0.74028	0.698316	0.603549	0.48713	0.69049	0.96836	1.13944	0.711438	0.907704	1.24856	2.80949	1.15059	1.08825	0.841542	0.958749
9	5.16047	4.53284	2.22481	3.60238	5.13747	3.95805	4.3821		6.67558	4.79364	4.88951	4.59782	3.18881	2.59341	3.14442	3.35244	4.3624	5.63381	2.62908	3.16871	1.82061	3.22258	3.56359	3.2136	2.84377	4.45016	1.35577	5.07027	4.24109	3.97174	0.443904	0.802531	0.803941	1.3312	1.92647	0.892164	0.687578	0.283862	1.29638	1.07578	1.49777	0.523406	0.819041	1.13825	0.700188	1.1741	1.31736	1.58042	0.490626
10	4.81398	7.0057	2.88542	4.84305	7.95138		4.11867		5.05201		5.83051	6.52548	3.62759	3.79087	2.95865	2.88644	4.12098	4.0069	2.79279	4.08308	2.86558	3.63337	3.50074	3.76704	4.58809	4.54675	2.81316	5.68657	3.04602	4.99661	0.739368	1.3686	0.844211	1.70913	0.692099	0.955098	0.59053	0.596257		1.29956	1.97169	1.03509	0.894493	1.29773	1.02272	0.911488	1.19919	0.576326	0.869053
11	7.00501	5.78576	3.43839	6.1894								7.83521	5.12763	6.16906	3.37329	3.49809	3.45875		3.40701		5.99558	4.27555	3.62739		2.97176	5.427	4.76823	4.96989	5.93028	6.16471	0.730597	1.06838	1.4282	1.48554	1.59186	0.665773	0.703648	0.789166		0.830142	1.5294	0.720368	1.18371	1.00142	0.596439	1.19838	1.6747	0.861816	1.3151
12			5.03231	5.89493								5.33703	4.61076		3.65519				4.03759		8.11005				4.02281					3.10818	0.767867	0.658079	1.23919	1.28755	2.78752	0.953821	0.382928	1.0344		0.89045		0.697373	1.03094	1.23974	1.02959	1.38022	1.28909	1.24929	1.13644
13															3.43485						8.63657										1.03511	1.08596	1.53898		1.27117		1.20711	0.800102		0.637029		0.511833	0.644353	2.02279	1.17846	1.95228	0.925409		1.52915
14																															0.851485	0.803772	2.05024				0.677399	0.855895		1.02076			0.827037		1.04911	1.60799	0.801125		0.95108
15																															0.699677	0.786527	1.82523							1.09208					3.05203	1.27848	0.917848
16																															0.816046		1.42467							0.95962						4.28348	1.27739
17																															0.87901		1.57097							1.06254
18
19
20
21
Figure 4 - figure supplement 6B - Klp9-GFP intensity (AU) throughout anaphase B progression in pnmt81-dis1
Time of anaphase B (min)	wt																																								pnmt81-dis1
0	1205.54	2165.1	1994.56	2560.45	1531.11	2226.4	2024.58	615.79	2695.42	1983.8	1923.74	1333.85	2516.4	3300.96	2180.94	1294.9	2190.08	2402.4	2738.44	2056.32	2221.05	1178.1	1929.7	3369.51	2801.4	2323.2	2332.44	1993.48	1873.35	2872.8	1642.2	2934.47	2452	840.4	1701.56	1574.37	1254	1401.6	2898.48	3189.73	1880.2	1826.12	1944.04	2523.27	4188.8	3051.4	2865.9	2133.44	3176.04
1	2596.92	3289.96	1641.64	4447.52	1899.12	3463.32	3220.14	826.54	2298.24	2226	3212.64	1955	3995.32	2688.7	3328	1928.73	2228.16	3572.38	2743.44	2317.48	2712.45	2047.92	3113.28	3782.52	2385.72	3988.6	2208.05	3768	3354.05	4097.6	2022.79	3597.75	2620.1	1919.19	2847.51	3102.36	1996.4	1578.84	3759	2346.54	3058.77	4811.76	4044.96	2270.25	3676.47	4531.52	5058.52	2839.2	3140.89
2	2709.45	1451.52	3520.9	4054.48	1689.12	2909.98	2997.82	715.3	2640.4	3504.05	3492.58	3853.2	3745.44	2498.95	3958.96	2324.16	3130.4	4149.6	3579.4	2042.39	4927.13	3808.95	3126.78	4046.3	3075.2	5482.35	4368.84	3825.08	2556.29	4001.58	4001.34	4029	3761.48	2823.7	3940.6	3925.35	1811.18	2241.15	3952.8	3608.36	4257.96	6621.24	5793.48	3303.1	2676.55	4974.89	4942.14	5411.19	2726.88
3	2301.44	1534.35	2770.08	2123.21	2664.3	2955.96	4333.14	1677.96	3524.29	4646.53	4084.08	2787.56	3763.88	2236.52	4663.44	2731.78	4012.12	3538.08	4378.35	2497.96	3769.92	2403.5	2742.52	4265.64	3131.59	3782.3	3976.13	4733.82	3114.36	3521.21	4565.76	3737.36	6359.25	2454.1	3491.4	3793.92	2867.5	2478.48	3231.36	3741.92	6035	6647.34	6902.24	2863.57	3406.47	4889.76	4554.06	5054.22	2840.08
4	2390.4	2004.48	3636.3	3507.79	3877.37	3657	3106.96	1680.41	3408.1	4795.14	4560.15	3567.82	3096.24	2863.8	3931.45	2430.89	3459.34	4192.21	5171.88	3129.08	3768.96	3062.4	2580.7	4985.19	3977.16	4437.21	4206.9	4783.36	3446.24	4596.35	5076.75	3822.26	3540.89	2498.3	3200.44	2973.3	2678.4	3416.16	3682.17	3596.8	5658.48	7994.7	4841.94	2854.25	3238.4	5405.4	4140	4699.89	3121.56
5	2252.92	2140.84	3558.4	3910.5	3347.4	4050.93	4326.2	1989.48	2962.41	3653.12	4662.99	3063.6	2575.6	3102.07	4643.8	2338.36	3805.39	5553.9	5381.45	3296.64	4521.84	3910.17	3476.57	4840.5	3897.24	4928.64	4548.79	4162.56	3858.41	5324.94	5441.59	3829.5	4839.83	3311.98	3049.2	3706.4	2761.2	2939.1	3713.36	3808	4457.84	6133.88	5934.9	2988	2979.28	6031.04	4350.88	4480	3308.93
6	2191.28	2292	3321.12	4482.86	4263.44	5065.14	4184.7	2035.23	3154.56	4939.48	5384.4	3885.75	3930.66	3262.49	4632.64	2646.28	4199.23	5617.71	6136.4	3202.5	4377.8	3960.9	2785.92	5366.4	3896.2	5018.4	5567.38	4197.79	3729.36	5230.38	4748.22	5162.22	4594.66	1625.65	3345.82	4065.67	2708.84	3418.35	3588	3570.72	4905.12	7796.88	6182.33	3446.3	3333.3	5818.47	4504.29	4817.79	3445.53
7	1957.34	2436	4677.81	4057.2	5293.04	4367.6	4445.84	2377.9	2902.96	5153.61	5052.02	3115.2	3012.52	3120.9	5344.87	2813.88	4040.64	6643	6012.44	3237.36	4443.39	3402.6	3170.16	5095.58	4154.36	5929.7	4285.44	4214.98	3405.15	4931.55	5942.28	5078.3	4646.25	3702.56	3870.91	2967	2602.37	3330	4005.99	3160.17	4767.9	8188.11	6561.24	3362.6	3431.7	5141.78	4690.4	4366.42	2927.9
8	2303.7	2292.76	3694.95	4196.08	4130.1	3518.58	5032.37	3027.2	3273.44	5310	5342.9	1840.8	2790.78	3326.4			4459.04		5848.9	3438.08	4751.8	3376.68	2899.84		5369.07	6197.36	3692.88	5764.5	3792.68	5074.92	5233.5	5143.45	4501.31	2789.43	3979.64	2951.82	2364.62	3980.68	4230.45	3247.86	5735.88	7923.6	7018.4	3048.57	3150.32		4257	4439.22	3116.76
9	2150.16		3644.16	3993.41	4240.92	3870.72	4223.68		3120	5487.8	5675.35	1988.56	2794.01	3177.88			3938.49		7320.86	3573.68	4319.76	4179.54				5387.64		6259.36			5910.18		3960.48	2701.56	3470.7	3698.52	2250.9	3969.76		2563.2	4945	8615.25	6837.76				4869.02	5021.1
10			3261.52	4028.52			6000.96		3551.31	5464.2	4931.16	2025.02					3894.18				4176.8							5166						2420.9		3195.39	2590.08	4008.9					5852.96					4852.16
11			3332.55						3488.55								3220.06				4472.2							6008.32
12
13
14
Figure 4 - figure supplement 6C - Klp9-GFP intensity (AU) in total and at the spindle
in total		at the spindle
wt	pnmt81-dis1	wt	pnmt81-dis1
5229.84	8698.4	2205.91	4570.22
6746.5	12604.2	2178.56	6655.89
8444.72	9262.89	3254.5	5628.57
10696.1	4287.66	3760.18	2962.21
6930.42	6891.25	3293.59	3342.37
9216.9	5657.61	3608.56	4980.53
9263.64	10005.1	3990.58	4423.22
3660.41	5756.12	1660.65	4304.88
6830.2	6862.79	3084.97	3089.4
10261.4	8499.66	4287.61	3205.2
9863.62	5507.1	4392.91	3101.7
11263.8	6159.78	2674.22	6063.22
9903.6	8580.81	3222.09	4678.46
7379.88	7524.63	2957.87	4366
8832.4	12476.1	4085.51	6019.43
5273.94	6596.64	2313.62	3659.55
10795.7	6713.42	3548.09	3617.01
10022.4	5312.05	4458.66	2017.74
9925.04	6966	4931.16	4423.66
7958.72	7484.4	2879.15	3178.39
8361.57	6467.58	4038.59	2827.48
7584.66	12411.4	3133.08	5491.24
6557.59	9622.8	2865.7	4597.31
8500.8	10048.5	4468.95	4929.25
7879.65	11709.2	3631.99	5072.24
8969.4	7938.6	4747.54	5122.27
9621.4	13698.7	3909.65	5917.87
9003.73	8754.57	4573.1	3532.15
6399.35	6630.69	3207.76	3014.22
11145.2	5804.4	4281.26	2878.72
6060.56	6568.21	4458.46	3856.29
9480.52	7567.89	4148.26	4233.21
10326.6	7872.48	4127.62	3704.75
4945.08	10848	2466.69	4469.41
7964.3	12043	3269.68	4553.51
8804.76	11277.6	3268.55	4225.9
6937.97		2353.23
6601.56		2978.46
9259.4		3673.51
8879.97		3283.33
[truncated: 27 more columns]
