# Supplementary material for: Kinesin-6 Klp9 orchestrates spindle elongation by regulating microtubule sliding and growth
Source: eLife. 2021 Jun 3;10:e67489. doi: 10.7554/eLife.67489 (PMC8205488; doi:10.7554/eLife.67489)
Supplement: Figure 5—source data 1. [file elife-67489-fig5-data1.xlsx]

## Sheet: Figure 5
Figure 5C - Intensity spectra of Klp9-mCherry and Dis1-EGFP in wt
Distance (µm)	Klp9-mCherry (AU)																														Dis1-EGFP (AU)
-8
-7.84
-7.68																				0													39
-7.52																				0													0			0
-7.36																			0	0											0		0			129
-7.2						47													65	0											0		194			364
-7.04	0		0			69							0					0	47	0											0	0	870		437	528
-6.88	0	0	0			100							0					0	35	0											0	0	987		468	1254
-6.72	0	14	0			141							92					0	75	0		0									334	0	1954		355	2083								0				60	50
-6.56	0	0	18		200	265							0				0	0	77	102	0	0								0	605	113	3098		616	1643	0			0			0	0				112	93
-6.4	183	10	43		201	461							25	0			0	0	179	68	0	59								0	515	305	2989		621	827	267		0	60			13	0		35	156	281	345
-6.24	132	20	45		0	365				138			0	0			0	0	263	144	0	190								0	144	391	2647		806	262	519		0	460		270	280	56		0	195	584	624
-6.08	55	28	108		89	313	0			287		73	0	0			0	0	137	201	0	117					0		0	0	0	525	1892	112	1007	470	767		20	932		352	615	318		147	95	1178	942
-5.92	112	0	254	0	189	377	27		37	198		73	0	0		0	0	53	151	184	0	8	0	0			0		0	0	0	350	1292	105	1104	566	1015		237	1622		607	1005	707	187	638	252	820	1669
-5.76	76	73	236	0	176	392	172		153	517		45	87	0	0	0	0	33	133	146	0	157	0	0			79		0	0	0	125	1209	73	538	598	1089		626	1511	172	1187	846	979	472	1162	572	397	1995
-5.6	150	34	339	0	356	351	392		232	354		277	33	0	72	0	0	103	214	0	0	168	23	0			122	78	0	0	0	261	875	647	140	582	1401	159	430	747	0	1640	596	728	486	1591	836	196	1634
-5.44	114	139	266	65	426	497	304		146	652	0	301	34	0	0	119	59	145	190	68	0	168	0	0			203	129	0	0	0	11	573	990	227	719	1908	120	597	258	356	1776	116	218	1070	1036	857	55	1355
-5.28	174	0	338	195	364	390	317	0	66	402	2	429	78	52	223	186	97	0	380	107	49	131	155	85	0		139	0	0	0	0	0	639	984	305	715	1883	169	746	0	565	1474	0	0	1808	598	748	177	1098
-5.12	0	0	287	246	250	386	246	0	119	593	24	468	0	139	270	6	143	0	231	107	0	131	163	91	60		21	296	0	51	0	0	840	679	251	829	1371	235	643	0	822	1205	0	0	2260	408	295	725	676
-4.96	0	42	280	312	358	397	229	53	81	814	51	371	0	252	335	182	9	0	104	29	15	287	182	0	0		235	267	0	4	0	29	997	520	213	1101	422	920	260	164	1233	707	0	24	1368	65	190	599	691
-4.8	0	8	320	495	304	391	313	82	112	758	142	354	0	198	383	112	32	121	189	0	0	122	298	0	0		130	123	0	0	0	100	828	209	42	528	468	1488	166	93	1420	777	0	495	607	60	144	494	742
-4.64	11	0	236	428	268	337	185	114	95	744	259	365	5	221	435	255	170	0	272	0	40	145	383	0	0		0	145	0	0	0	302	594	311	0	557	279	927	320	495	1127	674	163	275	519	25	181	557	497
-4.48	111	0	248	393	255	274	67	118	100	652	248	285	0	79	326	223	204	58	193	0	22	216	331	56	205	0	31	183	0	0	0	152	610	77	52	462	77	250	133	631	761	669	449	435	539	346	297	525	709
-4.32	30	130	166	430	334	181	127	118	139	560	252	233	2	118	586	186	17	34	136	0	20	55	342	53	100	0	101	168	0	0	0	44	719	0	75	543	126	159	29	336	898	653	489	705	720	466	209	519	844
-4.16	0	0	293	417	380	203	114	179	135	494	154	261	53	160	618	154	77	184	112	0	0	112	207	74	0	0	296	238	1	0	0	25	735	147	0	345	225	142	103	351	1052	588	486	667	616	767	168	864	700
-4	0	31	250	369	242	226	99	156	236	426	262	373	30	213	409	131	21	57	248	0	5	118	591	85	0	0	358	17	31	0	0	103	712	230	152	460	389	392	187	411	1315	845	434	411	390	610	305	694	970
-3.84	0	0	74	317	270	237	209	132	58	461	196	197	53	105	400	251	34	145	188	0	0	22	180	21	0	0	327	33	0	74	0	0	568	179	109	570	213	280	364	849	840	896	441	506	297	659	291	474	512
-3.68	0	121	58	334	292	159	145	137	26	364	239	364	85	83	344	205	30	107	54	0	0	50	259	44	59	0	283	245	0	113	0	0	371	42	249	508	176	264	545	683	1080	952	708	605	176	562	347	513	262
-3.52	0	84	0	237	185	148	215	53	138	248	260	167	0	0	431	294	0	54	0	0	0	0	339	46	31	0	114	188	0	149	24	63	374	72	372	641	166	237	225	654	657	950	728	311	0	507	643	386	368
-3.36	0	0	0	226	223	203	268	0	218	200	256	89	118	4	479	254	53	27	61	0	0	34	347	74	47	0	135	133	0	63	40	0	370	276	265	660	178	-58	285	857	575	797	529	106	0	470	710	131	369
-3.2	0	39	79	298	241	96	147	0	42	353	102	41	0	0	377	108	121	56	7	0	0	27	28	16	0	0	216	76	0	0	244	0	398	169	0	442	84	97	374	1207	434	621	659	442	204	387	748	413	324
-3.04	0	0	12	175	79	193	42	0	27	387	136	0	0	11	255	0	39	14	58	0	41	0	15	20	100	0	159	181	0	0	445	0	271	347	0	412	0	0	592	953	685	320	517	0	168	354	743	260	334
-2.88	0	0	18	342	42	132	108	137	29	298	61	0	0	0	375	0	113	6	61	0	93	47	0	0	42	0	132	160	0	0	241	0	0	452	0	266	286	0	315	682	295	189	454	0	21	251	578	238	459
-2.72	0	39	90	163	107	101	102	103	0	102	118	0	0	0	235	0	109	55	39	0	0	0	0	89	29	0	20	115	0	0	160	0	264	387	0	199	254	0	404	557	496	220	487	0	0	237	503	183	302
-2.56	0	0	62	155	12	193	169	0	0	195	128	0	35	0	178	0	174	29	55	0	0	15	0	31	0	28	69	124	0	10	0	0	376	478	0	200	384	224	432	271	369	0	525	0	0	32	528	146	34
-2.4	0	43	74	73	91	68	0	22	0	255	0	0	139	0	133	0	113	18	71	0	0	0	7	59	0	0	181	261	0	122	0	177	368	456	0	108	288	272	141	257	407	42	246	42	229	18	359	304	0
-2.24	0	23	121	125	42	72	38	24	0	447	0	109	157	0	17	0	0	0	138	0	3	0	39	0	49	0	89	253	0	57	0	0	141	548	108	282	110	0	0	241	357	220	155	0	161	12	247	197	56
-2.08	0	17	91	70	68	102	86	0	0	349	0	0	97	33	94	43	0	115	229	0	96	0	116	0	86	4	67	184	0	42	0	0	235	460	0	-66	44	0	0	436	309	272	304	0	96	0	158	114	212
-1.92	72	7	58	108	312	54	194	17	12	555	137	81	96	0	0	0	0	38	270	0	84	0	437	0	24	0	124	71	57	61	0	0	240	446	0	170	159	0	0	127	42	333	314	0	312	0	200	313	0
-1.76	466	0	99	104	201	356	166	21	99	502	39	62	186	129	54	95	0	105	468	134	25	0	749	72	169	0	0	202	145	367	0	0	304	330	0	426	0	0	0	116	80	283	250	0	96	0	175	195	0
-1.6	457	59	284	76	366	421	144	0	39	614	0	85	373	32	124	94	0	289	620	217	272	0	1143	62	309	0	0	164	186	517	183	0	304	170	0	498	0	0	106	94	90	373	166	0	136	0	108	274	18
-1.44	532	242	527	211	545	559	403	306	177	675	15	243	281	0	260	235	0	571	799	274	444	292	1559	153	390	100	0	275	364	723	202	0	205	202	0	212	0	0	24	304	0	297	220	10	132	0	0	151	143
-1.28	694	301	769	176	531	491	626	390	373	670	97	297	413	64	330	384	25	843	848	364	710	635	1976	438	402	263	28	349	469	714	61	0	325	26	0	45	0	0	57	0	0	99	240	0	122	0	11	421	37
-1.12	948	247	1032	123	570	632	1075	473	465	934	98	544	607	2	689	322	43	858	913	353	1035	861	1896	795	443	331	149	170	541	611	193	0	168	0	0	50	253	0	77	48	0	0	2	0	99	2	129	520	0
-0.96	961	366	1326	297	641	626	1233	777	469	1092	97	674	793	24	1019	451	171	1154	1056	255	1536	1041	2226	1021	674	424	235	482	708	945	43	0	531	0	0	35	269	0	100	166	127	5	0	0	90	0	163	428	0
-0.8	688	499	1361	699	671	643	1322	700	774	1207	287	840	1006	373	1289	380	80	1100	1481	460	2062	1236	2076	1228	938	506	637	620	710	934	164	39	413	0	0	119	246	47	295	194	43	225	0	0	103	31	70	346	0
-0.64	881	673	1750	984	759	726	1642	836	838	1420	468	1267	1076	501	1513	343	170	1165	1678	466	2369	1533	1839	1499	1017	713	1026	856	850	1104	94	21	697	0	0	0	165	0	220	162	0	0	153	6	343	373	87	175	172
-0.48	1049	594	1831	983	824	759	1716	853	955	1263	861	1553	1529	605	1956	404	326	1499	1645	534	2119	1504	1846	1402	1214	740	1674	784	974	1157	287	0	693	0	0	0	0	0	283	260	65	0	326	3	292	595	265	329	233
-0.32	1103	648	1902	1011	873	755	1753	1013	1231	1176	1305	1598	1529	954	2215	496	198	1477	1535	622	2016	1427	1528	1470	1387	771	2264	706	1279	902	0	70	907	0	0	71	10	0	118	375	122	33	284	75	161	538	222	0	230
0	1461	966	1700	1165	917	873	1941	1153	1203	1388	1473	1751	1483	840	2179	600	214	1533	1314	643	1901	1492	1101	1382	1513	789	2299	1053	1273	975	0	0	817	0	0	49	0	0	61	291	24	147	232	0	78	48	92	0	245
0.16	1732	848	1539	1234	917	875	1896	1016	1303	1405	1586	1836	1529	938	2308	560	402	1174	1214	754	1557	1509	740	1033	1393	838	2109	891	1159	1028	0	147	554	0	0	0	0	0	0	535	226	0	374	103	25	0	0	76	229
0.32	1787	871	1619	1393	1056	739	1825	957	1276	1247	1104	1708	1292	968	2371	568	397	1032	1204	901	1186	1402	432	888	979	670	2046	1050	1214	716	0	75	390	0	0	0	144	314	0	526	149	320	255	126	0	0	0	181	72
0.48	1995	871	1599	1365	1074	766	1626	768	1323	1246	1064	1678	1226	1161	2208	482	626	836	1402	1052	936	1408	188	628	898	720	1640	909	1052	454	67	99	358	0	0	52	0	579	0	253	0	265	332	360	0	0	114	364	115
0.64	2326	824	1896	1453	1093	745	1577	625	1483	796	1119	1708	1253	1227	2073	476	832	646	1092	1036	683	1105	85	492	686	820	1234	798	909	269	230	201	0	0	0	88	151	298	115	323	0	300	233	320	0	0	90	465	129
0.8	2393	886	1595	1572	1139	899	1294	430	1259	759	1018	1264	999	1275	1745	558	640	450	1141	1270	478	872	108	226	335	561	1098	748	735	181	40	305	128	158	0	0	260	144	0	23	0	333	279	275	0	0	94	241	82
0.96	2634	745	1468	1559	1050	866	1068	319	1066	843	1040	1308	785	1559	1506	665	647	272	926	1167	345	629	127	267	156	630	858	606	493	42	66	259	80	71	0	0	328	185	0	241	0	232	151	552	156	0	160	269	0
1.12	2347	665	1216	1462	983	682	1108	247	832	496	880	1379	601	1612	913	594	943	123	635	983	238	393	54	81	79	402	728	152	384	0	121	271	117	0	0	170	702	132	0	178	0	0	166	378	127	29	182	266	0
1.28	1729	551	960	1160	967	709	903	170	660	310	554	1166	345	1294	474	290	866	83	425	1004	66	234	55	51	67	250	336	108	424	34	131	306	0	0	93	0	402	21	0	306	48	0	0	470	97	45	118	536	0
1.44	1142	361	866	1066	871	825	512	42	597	423	223	886	198	1117	406	286	791	40	193	1028	0	223	37	3	29	178	275	0	207	0	0	299	0	177	29	166	200	124	0	421	194	119	0	327	56	127	0	629	164
1.6	519	328	633	714	714	604	346	0	424	318	198	580	132	1190	279	150	787	0	52	595	0	69	36	63	108	116	98	0	99	2	0	428	0	56	86	7	165	190	0	231	0	0	12	553	0	75	99	536	45
1.76	208	187	278	310	593	541	43	0	170	293	56	474	65	789	353	36	628	0	100	301	0	0	34	14	92	47	100	34	0	0	0	89	184	248	100	182	0	16	0	254	0	144	16	149	191	175	60	279	138
1.92	37	248	216	227	488	510	113	0	0	345	42	278	4	707	319	114	568	0	150	268	0	0	67	9	106	78	148	32	0	0	0	110	39	0	69	0	234	31	0	373	0	283	0	491	316	256	39	0	206
2.08	0	122	17	265	243	371	92	0	0	298	0	204	14	544	241	0	367	0	108	180	0	0	99	0	56	48	188	0	0	14	35	208	92	0	22	0	264	75	0	106	0	224	88	277	389	46	80	0	309
2.24	125	73	73	235	179	223	158	24	37	246	0	8	0	378	61	47	319	0	78	117	0	0	33	44	85	92	118	0	0	0	60	0	302	0	0	0	354	1	0	297	0	0	75	95	730	28	33	0	212
2.4	39	202	153	32	9	133	100	159	52	209	0	0	0	88	83	44	149	0	98	7	0	0	141	128	108	0	31	0	0	0	0	16	74	0	0	0	334	109	0	502	0	198	200	162	551	94	156	169	173
2.56	0	107	156	45	53	0	134	183	83	244	9	0	0	130	47	132	26	0	0	0	23	0	226	179	29	33	94	0	0	0	0	204	97	0	0	0	342	364	0	527	0	357	467	158	539	273	248	530	46
2.72	0	24	42	128	150	0	284	203	255	314	0	0	3	17	189	0	0	0	16	0	34	0	206	152	124	0	72	0	0	0	0	212	220	198	24	0	223	274	0	727	0	433	639	281	678	416	157	446	335
2.88	0	180	70	143	12	0	143	254	313	215	22	0	56	0	438	51	0	0	0	0	0	0	193	222	171	0	103	8	117	0	0	86	358	168	0	0	147	406	0	741	265	587	885	151	389	381	200	447	341
3.04	0	89	16	188	0	0	104	320	273	168	66	58	89	6	329	3	60	0	74	2	11	0	115	78	76	0	58	0	0	0	0	258	443	48	0	0	0	503	0	1057	259	664	810	571	341	556	195	479	2
3.2	0	0	114	282	75	0	188	332	164	384	76	105	76	122	424	33	0	0	117	0	0	0	202	74	0	8	122	0	0	0	84	319	540	391	75	0	0	581	0	963	528	985	1064	464	396	514	223	570	232
3.36	0	161	205	478	164	0	345	315	20	292	175	389	118	0	346	219	0	0	9	0	53	0	161	167	0	10	0	0	0	0	0	187	524	115	202	0	0	681	0	702	562	887	1074	396	507	150	207	750	193
3.52	0	7	169	605	182	73	395	261	167	373	148	344	115	0	277	183	0	0	32	0	51	0	149	93	0	0	152	40	98	0	199	201	465	0	315	0	6	986	0	440	426	818	759	256	348	175	96	552	379
3.68	153	36	232	339	96	59	419	426	126	373	150	408	207	84	404	162	0	0	76	0	39	0	142	87	0	11	224	122	68	0	117	57	415	0	382	0	89	777	0	396	526	741	950	228	404	32	51	351	117
3.84	269	194	264	535	199	150	478	325	260	435	126	464	65	227	415	197	0	0	98	0	28	0	103	29	0	0	148	229	0	0	179	64	141	73	0	0	75	562	0	315	576	841	844	495	277	61	153	507	0
4	0	0	299	436	169	110	523	284	276	432	174	514	138	183	358	234	0	0	218	0	112	0	171	88	0	23	178	68	0	0	26	0	75	0	0	0	123	408	139	59	432	890	1042	884	319	0	100	356	21
4.16	11	211	185	410	239	117	458	213	174	361	162	515	126	209	359	200	0	0	215	108	6	0	115	0	140	74	102	313	0	0	373	0	104	234	0	0	387	536	394	9	79	783	697	530	204	74	1	390	181
4.32	154	264	170	537	283	144	286	328	102	355	152	453	123	136	434	252	0	0	77	0	0	0	0	0	110	58	106	205	0	0	721	216	607	43	326	0	84	465	255	0	0	584	870	815	383	154	0	150	245
4.48	277	149	218	378	302	102	375	187	242	140	176	477	105	178	418	313	0	0	148	0	0	70	0	54	88	135	128	226	5	0	599	0	261	51	123	0	151	448	206	0	0	669	765	677	514	206	0	104	155
4.64	244	245	235	432	79	53	321	147	140	280	344	505	110	212	308	339	0	0	229	33	0	64	45	6	60	122	0	107	0	0	720	0	337	0	194	0	0	559	254	0	0	648	672	584	450	332	0	0	140
4.8	444	59	285	494	158	111	355	270	324	304	122	534	296	248	357	311	0	0	206	95	0	0	149	0	18		0	76	0	0	718	119	229	0	143	0	0	465	237	0	158	509	922	852	454	255	0	0	416
4.96	434	174	423	395	265	125	305	114	332	278	2	551	220	176	322	272	0	0	98	78	71	60	24	0	45		0	48	0	0	331	157	81	182	0	0	0	742	349	0	567	652	1186	688	955	656	0	0	355
5.12	288	207	317	353	182	91	154	134	171	324	0	500	194	183	337	259	0	0	92	73	38	0	54	27	121		0	0	0	0	362	297	180	616	0	0	0	1154	630	0	1016	802	1032	1047	1172	1495	0	0	383
5.28	334	234	313	345	57	184	263	26	88	459	0	551	144	52	208	272	0	0	0	62	121	0	14	163	181		0	0	0	0	383	180	0	476	44	0	282	932	479	0	1091	1419	1241	1800	1274	1813	0	24	558
5.44	444	106	177	283	82	202	167	98	4	336	0	469	46	15	57	302	0	0	95	81	0	0	0	199	149		0	0	0	0	519	142	0	341	30	0	1027	247	701	474	463	1908	1289	2050	859	1673	21	0	579
5.6	397	75	257	89	124	91	282		77	459		287	95	0	56	163	0	0	8	93	0	0	0	0	78		0	0	0	0	748	258	176	183	133	0	1667	308	917	948	142	1936	2107	1140	347	1226	380	0	1020
5.76	504	0	297	73	103	176	202		93	418		103	90	0	0	0	0	0	69	114	0	0	0	131	160		0		0	0	773	376	433	228	226	0	1799	278	626	518	0	809	2829	939	160	814	384	302	1383
5.92	566	28	285	74	171	200	74		0	708		48	47	0		0	0	0	0	114	0	0	0	43	140		0		0	0	713	392	673	61	458	0	1456		284	329	0	171	2799	795	182	59	377	502	1855
6.08	686	21	351		31	191	109			538		0	0	0		0	0	0	0	107	25	0	0	0	115		0		0	0	622	673	975	24	580	0	1017		255	84		0	1594	252		26	117	895	1180
6.24	568	1	446		43	103	170			376			6	0			0	0	0	117	0	0			0		0			0	730	956	1205	0	303	0	440		0	0		0	925	90		0	9	385	773
6.4	598	0	213		104	125				192			20	0			0	0	0	73	0	0			39					0	757	900	1016	0	138	0	110		0	0			598	136		0	0	0	312
6.56	424	0	144		89	0							125				0	0	0	0	0	0			89					0	1136	544	526		126	0	0			0			353	0				15	0
6.72	225	0	103			44							89					0	12	0	0	0			35					0	858	424	612		0	0							27	0				14	0
6.88	166	169	172			25							14					0	0	29					25					0	102	243	347		85	561												0
7.04	243		233			0							0					0	0	0										0	0	140	192		0	580
7.2			117			0												0	0	0											0	0	23		0	372
7.36						17												0	0	0											0		0			0
7.52						0												0	0	0													0			0
7.68																		0		0													0			0
7.84
8
Figure 5D - Intensity spectra of Klp9-mCherry and Dis1-EGFP in clp1Δ
Distance (µm)	Klp9-mCherry (AU)																														Dis1-EGFP (AU)
-8
-7.84
-7.68
-7.52
-7.36
-7.2
-7.04														0
-6.88														0																						0
-6.72		0					0							0																						0
-6.56		0					0							0																						0
-6.4		0					0							0															0							197
-6.24		97				120	34							0															0					0		161	0							120
-6.08		103				62	0			0				0															87					0		672	0	0		0				34			0
-5.92		240				186	0			14				5				49						0			0		213				0	97	0	1282	91	0	0	18			0	0			207
-5.76	0	164	0			187	0	29		205			0	119			0	49		0				86		0	0		294		0		0	2	0	797	628	0	0	1054			0	0			200	0
-5.6	0	193	0			215	32	72	0	49	28		0	190			110	134	0	0				161		23	0		226		0	80	124	421	58	335	1268	237	267	1085	160		72	61			270	102	0
-5.44	217	254	95			319	65	72	0	317	13		21	247		0	0	305	0	5	0			240	0	103	0	87	226		236	301	333	1002	277	352	1476	722	921	1149	99		95	331	0		516	197	0
-5.28	293	170	56	0		274	45	237	15	389	122		82	454	0	0	162	256	2	318	0			314	0	81	0	48	217		718	327	954	578	684	0	805	1327	852	578	88	97	1105	490	0	558	1015	884	0
-5.12	401	268	86	17	20	223	210	323	203	376	175		159	501	7	0	153	303	126	180	92		0	388	1	152	0	217	332		1602	838	1279	687	823	56	655	1324	523	158	355	337	2067	568	0	653	573	1096	237
-4.96	488	214	228	43	32	70	46	294	353	335	252		166	398	54	0	52	383	105	125	64	0	0	442	46	308	0	51	176		2264	1671	777	133	414	0	226	697	194	0	1145	355	1948	160	0	554	305	1072	377
-4.8	511	160	257	196	162	189	49	118	293	407	330	0	187	298	168	0	286	529	192	258	118	71	64	387	203	360	0	176	170		1774	1577	105	215	65	279	180	261	111	1	1495	832	1141	0	255	778	0	584	806
-4.64	561	292	256	355	157	328	26	197	274	323	390	26	252	276	0	0	365	772	246	237	295	232	112	551	378	315	0	439	147		811	1002	0	240	46	554	157	199	34	0	889	1590	0	0	265	912	0	256	1108
-4.48	551	339	105	318	181	245	80	169	350	408	402	123	149	72	192	0	277	625	226	129	340	303	329	504	376	258	24	245	150		147	605	0	117	0	636	77	118	0	0	446	1241	0	0	0	1527	0	144	816
-4.32	482	146	290	250	92	215	0	107	235	170	269	173	267	208	266	0	274	718	231	232	260	397	371	646	385	479	33	406	82		94	425	0	0	0	664	0	218	0	0	267	681	141	0	0	1019	16	106	245
-4.16	594	74	210	239	46	133	41	216	318	188	327	46	52	236	231	81	344	597	231	221	211	480	315	575	166	477	32	440	72		324	428	0	9	0	467	56	505	0	0	252	97	0	0	0	491	0	0	0
-4	716	80	246	308	183	179	197	58	301	190	372	181	130	466	258	127	320	685	240	233	158	568	339	471	223	623	132	333	113		166	194	0	111	0	217	289	51	0	0	274	41	0	0	0	0	0	263	0
-3.84	736	80	148	213	163	130	140	0	304	265	379	151	398	299	126	47	68	632	287	203	204	566	240	443	350	509	11	383	0		80	387	0	0	0	236	360	125	0	33	42	193	0	181	0	0	0	411	0
-3.68	595	130	200	119	267	82	176	93	309	83	493	176	417	346	140	0	195	655	157	57	118	719	131	514	343	503	0	189	12		92	143	0	117	0	228	407	0	211	224	0	111	0	86	0	0	0	269	0
-3.52	612	151	241	107	168	50	210	133	277	31	428	264	378	309	155	1	167	475	221	66	162	698	109	430	330	480	176	460	0		104	209	0	17	149	40	454	0	25	0	0	74	48	165	0	0	0	111	0
-3.36	339	60	132	201	241	62	421	128	93	10	262	91	323	188	135	22	114	495	231	106	84	492	255	333	413	353	30	348	53		72	126	0	0	335	0	294	72	0	0	0	0	0	337	10	0	0	117	0
-3.2	309	0	162	148	163	54	332	306	104	0	175	180	180	259	59	0	71	441	128	141	109	441	194	342	390	262	4	417	0		136	0	0	0	249	118	418	22	0	258	0	0	0	557	0	0	0	68	0
-3.04	368	0	123	333	89	0	292	277	91	174	227	0	112	72	196	0	327	387	96	75	149	481	105	340	345	144	123	397	14		93	44	0	71	310	355	308	90	0	109	0	0	0	143	113	0	0	0	0
-2.88	156	0	108	209	146	0	353	376	0	77	74	38	99	78	233	0	221	329	106	98	223	462	95	474	117	53	2	288	35		161	210	0	313	0	205	233	146	41	111	0	0	0	0	114	0	0	225	59
-2.72	35	18	129	160	185	0	89	596	16	163	0	126	85	200	99	0	166	152	168	61	244	309	79	369	154	64	61	351	42		282	426	94	157	250	228	430	414	48	168	0	0	0	322	28	0	106	394	0
-2.56	20	39	99	115	171	0	0	417	99	261	83	95	0	110	230	0	110	260	173	65	179	272	125	516	149	142	52	56	0		273	308	143	164	415	187	230	38	86	335	0	0	0	365	0	0	42	322	0
-2.4	0	20	122	0	178	81	112	455	168	297	0	118	0	0	178	0	175	241	225	0	203	323	129	380	211	21	0	178	0		373	171	137	234	455	112	266	0	166	203	0	58	0	122	0	0	0	625	92
-2.24	0	103	32	47	225	100	65	427	208	278	0	104	124	83	207	0	210	249	230	33	120	114	138	419	166	0	0	55	0		181	101	156	119	534	0	390	143	0	365	0	371	0	208	0	0	0	353	0
-2.08	89	202	9	2	239	378	117	382	163	113	0	120	239	140	259	0	172	177	185	0	0	43	246	413	432	95	15	173	0		152	244	0	232	413	0	282	362	48	286	0	426	47	0	0	0	0	184	0
-1.92	129	200	397	153	150	715	154	390	325	267	0	185	388	68	196	0	43	270	198	0	0	204	243	470	531	182	0	286	93		114	183	152	0	352	178	143	187	84	108	0	498	320	76	0	0	0	214	0
-1.76	116	257	410	383	295	798	145	395	273	72	0	551	414	151	190	0	13	231	175	133	97	398	285	499	193	100	112	553	245		71	0	111	253	330	82	22	48	135	0	0	249	249	35	272	82	94	316	0
-1.6	165	208	479	314	420	938	193	384	369	0	18	204	603	71	157	0	58	579	256	300	161	534	69	646	282	192	102	226	100		55	0	8	137	388	0	296	192	100	29	0	260	133	0	79	133	0	335	55
-1.44	365	172	652	298	524	815	219	265	296	171	174	193	754	131	323	0	112	581	179	357	205	722	40	998	456	274	220	466	152		0	0	118	142	441	0	417	234	0	89	0	0	213	0	100	0	0	238	0
-1.28	397	205	729	548	625	688	181	267	297	107	347	204	705	63	500	0	81	565	294	280	205	620	18	1221	313	378	200	160	493		0	0	0	81	471	0	223	242	66	0	0	0	131	0	0	37	0	159	0
-1.12	552	271	546	642	419	924	320	297	345	201	272	341	783	7	533	0	70	586	296	422	163	396	323	1147	423	240	229	316	326		0	0	0	7	375	0	300	260	10	105	0	0	161	0	0	0	0	295	81
-0.96	412	371	821	492	475	969	161	400	394	168	537	403	822	144	565	46	0	382	351	374	160	484	384	852	409	443	34	177	568		0	0	0	266	65	0	418	0	0	339	0	0	261	0	29	14	0	6	0
-0.8	631	402	675	578	826	922	243	394	421	180	698	540	890	250	762	51	89	326	245	137	256	693	307	740	586	450	168	97	616		0	0	0	412	229	0	312	0	196	152	0	16	142	0	106	0	31	122	47
-0.64	730	408	615	559	949	903	245	291	418	253	793	743	909	476	889	6	151	375	321	218	196	594	325	871	549	332	78	374	706		94	0	0	376	233	0	151	0	208	0	0	131	17	0	0	0	208	0	0
-0.48	723	503	451	683	1079	954	173	246	303	300	778	1002	877	441	853	65	333	391	222	346	270	452	396	655	949	202	124	329	725		77	0	143	353	155	0	51	49	184	0	0	117	119	0	0	332	154	0	0
-0.32	789	512	409	644	859	870	153	369	298	281	1087	894	707	494	909	133	255	313	205	459	133	447	454	552	920	229	143	335	670		178	0	270	470	196	0	0	99	186	0	0	207	0	49	159	388	203	67	0
0	893	522	468	602	507	935	210	308	373	539	1444	873	551	449	878	279	300	333	393	490	213	445	510	425	778	116	154	593	414		88	0	100	481	111	99	129	213	34	0	160	188	0	150	0	329	130	0	0
0.16	798	534	402	487	470	825	151	277	349	520	1530	826	544	352	790	301	477	354	486	496	196	530	330	401	762	162	245	413	492		232	0	0	718	253	215	24	28	0	0	289	222	0	0	94	204	357	0	34
0.32	831	514	497	388	464	552	134	205	464	735	1514	728	495	373	841	230	370	563	461	599	243	594	331	334	430	261	216	450	351		246	0	0	285	170	38	0	0	0	0	201	107	427	0	312	93	666	0	0
0.48	919	532	169	272	535	636	195	266	320	876	1619	563	283	622	948	214	387	573	566	525	277	567	306	388	426	216	208	429	338		0	0	0	234	192	0	46	0	152	0	414	0	159	0	374	83	834	0	0
0.64	809	566	419	100	546	608	101	127	293	686	1386	468	191	805	695	265	581	570	600	510	415	396	203	267	251	335	352	330	434		119	0	0	175	262	0	12	0	0	0	427	15	32	0	452	227	351	0	0
0.8	483	505	342	103	506	338	40	41	254	782	1403	488	204	845	621	184	717	564	476	342	268	200	309	155	251	487	499	318	467		250	12	0	0	354	0	0	0	24	0	181	0	326	0	472	484	48	0	0
0.96	531	437	334	32	319	204	13	31	143	692	1312	184	353	735	679	217	878	361	404	579	331	217	290	81	218	320	388	287	189		283	0	71	0	166	0	140	0	234	0	288	0	247	0	645	551	0	0	30
1.12	530	499	508	1	298	460	86	6	196	991	995	266	215	931	555	445	762	169	378	513	299	274	212	205	77	134	218	269	187		261	0	17	255	161	186	40	87	146	0	260	0	71	0	456	381	0	0	0
1.28	376	601	324	40	202	306	101	45	172	806	660	195	218	639	432	587	708	290	276	775	398	164	177	108	127	297	187	418	224		329	0	234	347	149	48	0	0	98	0	0	89	146	0	307	441	232	0	0
1.44	333	569	252	90	215	210	240	41	154	571	224	106	285	946	349	831	697	333	372	545	330	290	282	75	0	305	322	106	80		104	0	434	340	222	0	0	54	0	0	0	67	25	0	434	661	239	0	48
1.6	390	572	246	147	116	213	99	22	122	764	67	0	283	780	135	780	376	350	392	582	231	166	337	70	137	361	449	261	0		283	0	282	290	132	5	0	0	0	0	173	169	162	120	270	759	170	0	160
1.76	284	628	306	52	204	87	237	0	137	497	207	0	272	652	144	741	482	409	376	444	216	97	312	0	18	337	405	220	0		22	0	39	352	58	122	18	0	0	0	45	248	347	85	10	519	264	0	0
1.92	326	545	373	182	156	255	36	96	170	416	186	0	216	668	121	730	550	293	218	620	81	32	141	21	0	330	485	86	83		75	0	15	199	0	480	276	0	0	0	106	263	261	105	0	537	210	0	32
2.08	329	576	285	36	110	182	87	106	155	592	180	0	373	427	5	615	462	168	169	539	0	127	171	0	6	262	422	387	78		0	31	0	176	54	148	270	56	177	0	205	138	248	169	0	302	307	0	0
2.24	281	463	119	232	150	10	204	137	58	322	144	0	345	181	69	502	186	32	258	506	25	132	0	0	199	179	404	0	219		339	0	0	278	144	185	334	0	153	0	10	0	409	265	0	0	266	0	0
2.4	470	384	191	330	114	52	206	100	70	346	232	9	351	27	81	159	253	0	227	425	99	67	0	0	193	147	305	0	154		406	86	0	100	150	312	14	0	116	0	0	0	399	73	0	0	233	0	0
2.56	247	446	151	171	0	28	109	81	156	212	301	96	287	0	44	0	225	2	136	347	40	0	0	0	358	166	240	0	62		338	68	280	309	186	0	0	57	358	0	0	0	114	0	0	0	181	0	0
2.72	446	169	258	243	67	46	236	13	111	188	251	60	87	0	40	50	213	0	92	524	70	90	0	61	244	243	164	0	165		363	97	360	210	90	0	78	0	228	0	0	0	245	0	0	0	234	0	0
2.88	471	144	382	232	180	13	202	0	47	131	453	71	173	0	125	19	383	60	278	327	0	120	24	48	168	338	85	0	172		233	0	482	104	145	167	0	0	179	415	0	0	0	0	0	0	227	0	0
3.04	566	22	318	271	173	60	142	0	10	215	374	65	113	70	216	0	486	181	260	302	8	108	187	73	58	269	12	220	69		0	0	83	53	0	222	22	0	129	55	0	0	0	0	0	0	108	0	0
3.2	686	108	332	325	179	49	220	13	88	278	398	177	148	182	189	39	424	182	367	639	72	81	40	88	114	413	0	3	24		0	0	128	97	185	274	170	0	185	200	0	0	0	0	0	0	328	0	0
3.36	728	147	229	353	59	18	154	133	297	454	421	106	123	39	308	145	401	95	264	627	72	29	65	129	36	580	0	95	0		0	0	0	267	127	75	158	0	127	312	0	0	0	0	0	197	239	0	0
3.52	575	187	309	346	217	0	324	87	262	226	600	260	69	257	337	149	409	166	101	526	86	91	250	160	142	605	0	293	0		0	0	0	135	87	0	0	0	187	366	0	99	17	0	0	275	112	0	0
3.68	859	163	249	417	505	0	410	37	208	369	792	285	75	155	461	151	262	135	202	517	151	83	266	264	0	470	32	389	0		7	0	0	232	125	0	0	0	110	0	0	285	92	0	0	0	8	0	165
3.84	721	309	277	412	460	167	138	0	267	411	538	185	150	179	518	140	355	125	169	666	161	3	188	184	95	585	0	282	10		0	0	0	275	113	0	0	0	0	0	0	175	26	0	7	0	104	0	137
4	804	428	244	345	351	126	319	25	375	481	741	291	251	265	393	27	356	209	295	483	117	59	217	154	147	756	0	272	0		52	0	0	13	0	0	48	0	111	135	0	51	0	0	24	0	189	0	0
4.16	646	377	323	291	332	323	139	29	329	558	780	295	108	563	486	48	327	318	368	622	212	14	183	89	96	603	0	315	0		0	0	0	76	73	196	90	0	50	123	0	49	0	0	433	0	312	0	0
4.32	675	442	193	208	396	152	147	125	324	573	721	157	0	410	530	0	338	198	306	682	116	27	234	155	132	508	0	403	154		134	0	92	86	181	0	193	0	59	30	0	197	0	0	469	0	344	0	2
4.48	814	668	299	181	318	173	82	97	297	684	592	199	52	236	500	117	374	295	217	523	119	0	328	222	133	826	29	430	133		138	240	277	0	375	0	66	0	463	411	0	271	0	0	1407	0	173	0	0
4.64	722	704	239	220	240	127	93	46	124	840	549	71	58	193	423	19	353	289	123	534	201	0	335	220	138	690	41	490	198		159	569	707	0	561	0	0	305	505	491	62	942	0	0	2522	295	30	250	117
4.8	576	572	151	90	247	284	94	140	222	625	504	38	89	219	246	0	393	221	74	480	120	0	275	206	68	448	50	321	98		502	1003	667	0	1146	27	0	930	992	562	675	809	0	0	2484	0	3	942	436
4.96	587	652	271	0	326	265	0	0	346	482	449		17	404	0	0	365	273	40	552	203	0	70	256	171	610	0	308	150		1319	698	688	88	1379	31	0	1214	1297	823	879	341	191	0	1538	0	67	1452	925
5.12	398	519	166	51	107	299	0	0	337	427	172		0	350	129	0	324	225	99	272	0	0	4	256	0	459	8	331	63		1356	348	535	466	945	13	256	889	911	1051	680	0	533	842	809	0	657	1449	1133
5.28	258	551	4	0	69	307	0	0	279	544	45		0	213	0	0	120	239	63	71	0		6	181	41	369	12	204	233		969	0	621	276	576	373	517	707	445	2196	0	0	1145	1462	786	0	1070	795	658
5.44	189	569	58			434	0	0	205	299	0		0	225		0	118	165	112	14	0			70	0	250	188	0	256		551	0	533	264	427	468	1153	377	263	2891	0	0	967	2027	475		1204	633	238
5.6	36	590	98			246	0	0	44	134	0		0	210		0	261	0	107	0				2	0	141	47		173		433	0	457	88	129	1213	777	310	268	1306	0		375	1322			780	101	24
5.76	0	644	125			278	0	0	0	231			0	43			146	0		7				0		1	121		0		141	0	237	0	114	1770	227	99	321	604	0		58	849			658	0	113
5.92	0	478	92			316	0	0		68				0			63	0						0		89	0		43		0		0	0	0	1007	0	90	0	372			0	400			146	0
6.08		441				193	0			89				0				0									0		6				0	0		667	0	0		450			0	42			0
6.24		285				19	0							0													0		0					0		420	0	0		429				14
6.4		58				51	0							0													0		0							230								0
6.56		131					0							0																						0
6.72		10					0							0																						0
6.88		0												0																						0
7.04														0
7.2
7.36
7.52
7.68
7.84
8
Figure 5E - Dis1-EGFP intensity (AU) throughout anaphase B in wt and clp1Δ
Time of anaphase B (min)	wt																														clp1Δ
0	528	887.84	1956.96	1688.88	1449.9	1655.64	1526.28	1177.19	768	1476.53	2032.8	3780.48	2950.36	2513.4	2337.66	2281.44	1184.4	1547.8	2416.09	2077.92	3560	1869.98	2216.16	2435.04	2748.15	1802.13	2046	1562.2	2459.92	1531.26	2192.39	2647.08	1971.36	345.92	1591.98	2104.32	2359.1	1833.14	1096	1701.68	1823.28	3391.5	627.2	2895.56	2398.59	1549.67		1333.32	2318.4
1	1017.06	1618.72	2822	1825.92	1166.67	1369.56	1847.56	1257.36	1283.66	1581.2	2275.74	4113.9	3608.73	2512.48	2204.76	2789.44	1077.3	1980.16	2580.68	2201.87	4963.18	2324.32	4062.96	2993.97	3454.4	2321.01	1896.96	2053.6	2173.3	2062.98	2396.16	1942.38	1913.08	1203.6	1107.6	2522.24	2872.92	1917	2210.88	967.05	1920.66	3070.86	837.2	2402.4	2225.52	2046.92	1101.66	1340.29	2371.25
2	962	202	4004.64	2279.6	1406.85	1878.92	1956.08	1419.04	803.6	2009.94	2551.77	4531.8	4050.42	3065.16	2917.2	2619.9	1182.5	2223.36	2298.9	2948.49	6011.31	1829.72	6254.64	2357.88	4084.5	2268.96	2809.62	2428.44	2926.37	1328.69	2302.5	1353	1535.55	950.4	2028.8	1799.55	1620.3	1927.96	2039.28	1746.36	1901.83	3101.04	945.75	1164.67	707.82	1795.8	1466.53	1783.96	2201.8
3	1354.08	1063.8	4284.28	3276.8	1934.79	1319.36	2170.45	1394.26	1268.69	2209.68	1866.08	5064.43	4554.33	3888.78	3334.1	3049.76	1553.64	2531.16	3190.12	2552.25	4571.35	2085.3	4190.04	2313	3494.38	2362.08	2813.72	3650.19	3093.31	2570.12	1669.92	968.35	1866.08	1013.14	1411.02	2101.56	2127.84	2959.44	2102.36	1179.68	2453.76	2554.46	2781.66	2391.12	667.85	2713.18	1334.8	1658.96	2554.92
4	2391.9	783.9	4426.8	3028.2	1486.29	2652.32	1632.62	1832.19	1570.96	3020	4393.48	5582.2	6226.5	3171.15	3067.57	3472.15	1581.18	2171.47	3985.02	3121.7	4973.88	3151.04	4425.26	2563.1	3666.6	3091.11	3278.5	3260.37	2974.14	3997.5	2038.13	1306.83	1409.35	586.08	2082.99	2563.6	2185.07	2618.89	1903.02	1306.5	2535.61	2533.44	184.11	2346.01	414.96	2187.64	1444	2052.09	1825.32
5	2241.36	755.16	6065.84	2560.2	2194.53	2678.1	2129.05	1915.28	1715.7	2552.27	2701.46	5140.24	4756.68	4169.04	3830.4	3510.24	2072.36	2803.64	3411.34	2883.6	5704.68	3037.95	6782.4	2898.92	4353.05	3648.35	2488.41	2778.48	2610.16	3946.8	2131.92	1642.45	1935.43	823.5	1623.6	1659.66	1784.12	1832.07	1787.12	1583.4	1506.72	2008.7	1542.53	1255.28	788	2737.8	1703.28	1554.74	2086.9
6	3359.2	879.69	5135.6	3516.51	2410.82	3627.12	3252.96	2726.9	2976.75	3799.84	3698.92	5637.84	5776.19	4957.59	4026.68	3785.9	1998.24	2971.92	3241.48	3095.8	4949.35	4299.54	4913.8	2924.58	5206.72	2782.5	3241.94	3700.62	2818.68	5003.35	1849.2	1334.8	1567.28	1113.84	1012.15	2862.72	2409.96	2158.6	1595.16	1374.32	1115.1	1824.5	1456.99	1766.81	802.53	2170.95	666	1392.32	1413.27
7	4172.94	1851.35	4976	2994.85	2564.62	2068.12	1924	2635.88	2293.76	4323.26	2807.31	5930.47	6607.58	4518	4594.52	4575.68	2066.64	2854.84	4857.09	3529.2	5548	3792.45	7012.56	3175.52	5378.64	2471.08	2061.7	3586.98	3075.45	5251.45	1624.76	678.9	1337.86	952.32	1247.52	1822.84	2671.8	2181.24	1552.45	1231.75	1523.42	1350.73	697.38	2025.6	647.82	3080.33	1435.32	1294.37	1648.2
8	2297.5	755.48	3539.49	2994.4	2356.98	2410.8	3668.28	1802.3	1837.99	3058.56	3240.6	6368.46	5829	4159.81	4578.35	5188.17	1858.67	2980.95	4802.16	3059	6343.56	2660.62	5510.4	3736.26	5793.32		2395.47	3885.18	4083.36	5022	1994.3	272.5	1225.91	987.48	1569.6	1417.05	2004.66	2450.3	1421.75	1267.68	2083.04	2209.68	1245.48	1539.4	580.86	1799.28	610.05	1148.1	1246.55
9	2454.36	1134	7194.14	2389.28	2151.52	2326.85	4412.65	2164.32	1810.15	4633.88	3020.16	6755.84	6599.2	4149.56	4375.1	4925.58	2138.85	3739.74	5015.07	3498	8343.28	3237.64	7451.28		4964		2168.14		3464.95		2287.32	1414.4		371.22		2056.36	2482.44	1714.44	1052.76	1067.64	2016.27	2224.23	1327.34	2264.07	599.3	1593	890.52	1458	774.4
10	3406.86	1612.68	6563.36	2112.2	2344.5	1402.5	2260.83		1237.38		4102.56	6514.8	6811.98	3804.75	4577.53	4987.04	2220.9	3144.04	4426.83	2973.5		792.88	6183.09		4904.11		930.16		3196.76		2040.2	1200.73		1122		1223.75	2239.65	1704.28	1614.72	874.72	1987.02	2307.36	1500.66	1974.39	1135.9	2241.72	1034		2614.68
11	3199.82		6049.04	946.8							3819	6800.56	5598.22		4076.64	5369.28	2637.48	3068.52	3638.55	2783.9												1012.63				240.21		1489.32			916.48				1287.44		1753.5
12																4573.71																						1091.75			2250.29				1809.99
13																																									1725.36
14																																									1272.32
15
17
Figure 5F - Klp9-mCh intensity (AU) throughout anaphase B in wt and clp1Δ
Time of anaphase B (min)	wt																														clp1Δ
0	1467.04	490.6	1776.6	992	1195.64	1268.73	971.37	804.42	960.75	1329.3	937.96	2408.08	795	1550.52	856.8	1290.64	1053.01	1057	2026.42	2973.44	1494.92	996.36	731.46	690.84	704.46	947.52	860.2	1578.42	1465.23	979.6	741.4	878.4	571.32	368.16	594.32	812.16	614.55	572.32	383.52	647.28	1142.1	1395.65	992	678.3	592.8	1042.47	979.6	693.84	1122.17
1	1841.49	1123.08	2404.92	1785.36	2739.11	1635.72	2560.56	979.71	1350.8	1244.97	922.5	3354.54	1245.28	1931.51	1676.8	1291.59	1401.54	1576.34	2449.92	2629.2	2238.6	1524.6	1660.44	1802.96	1483.04	1661.4	1801.64	1357.92	1491.2	1669.2	1138.5	1177	666.66	556.83	499.5	1058.4	567.84	413.44	762.3	549.7	1277.38	1947.98	549.63	1082.04	945.3	1600.5	1002.33	913.39	1280.64
2	1561.22	1317.65	2909.28	1897.83	1918.08	1453.9	3207.54	1773	2250.08	2217.04	1182.85	3819.85	2321.9	3173.76	1925.17	2157.41	1281.39	2008.38	3751.65	2247.74	2285.01	1817.9	2394.6	1830.15	1954.26	1928.96	2627.1	2139.28	1556.47	1476	1398.6	1283.75	1152.4	696.54	1091.2	715.99	1483.38	344.08	680.75	450.59	1306.22	2079	1149.88	1202.32	1204.74	1582.64	1202.13	1510.76	1435.23
3	1933.8	1171.89	3187.08	2022.4	2375.34	1771.92	2621.08	1507.38	2227.5	1647.8	1207.5	3945.73	2411.64	2348.68	3082.94	1356.08	1351.6	1975.6	2929.22	2198.94	2947.8	2312.4	3484.88	1613.21	1974.91	1564.65	2751.84	2398.82	1692.6	1530	1532.25	1085.84	959.76	1211.02	782.28	1183.68	1585.08	450	873.3	513.54	1333.99	1987.2	1037.93	1205.75	1369.17	1347.57	1674.27	1127.84	1056
4	1942.56	1455.18	3218.67	2368.4	2176.65	2367.48	2498.62	1301.3	2492.18	2065.5	1530.65	3599.73	2050.84	2794.88	3152.35	1337.42	1492.6	1902.47	2470.7	2268.48	2493.52	2283.02	2815.11	1361.6	1926.48	1284	3113.55	2311.32	1748.7	1731	1389.04	1428	1792.8	1193.6	959.85	957.44	1294.79	886.5	675.2	1028.45	1313.7	1811.04	1255.5	1407.51	2231.1	1604.28	1021.72	1086.69	972.36
5	3136.08	1791.54	2829.24	1905.68	2216.84	1762.02	2834.52	1378.08	2244.06	1755.27	1018.21	3450.3	2284.8	1899.12	3381.84	933.66	1293.6	1889.72	2586.87	2679.6	3180.15	2035.44	2891.04	1740.64	1689.23	1418.64	4050.8	1692.52	1630.8	2119.92	2034	1985.34	1562.82	1198.94	1059.03	1259.52	1333.32	796.92	868.28	96.81	1322.76	1935.82	1223.64	1449	1869.46	2187.64	1150.1	1328.9	1587.3
6	2797.47	1969.68	3241.35	2100.6	2407.37	2064.44	3831.04	2380.8	2953.58	2216.04	1609.49	3123.12	2516.99	2082.4	2866.2	1467.18	1404.3	2035.24	3227.52	2475.2	3322.2	3079.92	2876.8	2007.78	1852.55	1599.84	3106.16	1831.89	1458.17	2069.88	1370.16	2469.24	1257.72	1210.86	1346.72	1574.38	1249.68	1242.36	656	1127.5	2265.48	1818.41	1204.14	1526.84	1515.48	1592.16	922.14	1134.52	1717
7	2617.68	1802.28	3096	2314.24	2650.36	1998.81	3521.32	1775	2787.7	2344.32	1711.24	3697.65	2590.72	2748.73	2907	1731.84	1238.2	2427.2	3093.24	2661.68	3430.43	2896.18	2876.46	2021.76	1801.36	1500.24	2871.44	1927.4	2098.44	2430.48	1785.6	2046.24	1736.35	1228.3	1299.27	1884.87	1834.56	920.04	1622.5	1329.3	2164.33	2206.72	1250.19	1886.8	2329.44	1490.94	1216	1553.49	1263.15
8	2945.28	1867.56	3321.74	2978.29	2863.44	2308.54	3888.54	2059.29	2797.2	2835.9	1993.5	3617.7	2971.02	2826.95	4155.12	1971.74	1338	2640.61	3507.84	2410.16	3619.2	3302.52	3274.61	2090.13	1887.84	1435.92	2471.81	2162.56	2237.56	2344.98	1967.45	2035.8	1699.26	1247.8	1497	2158	1965.95	1059.96	1258.7	1203.6	2495.75	2479.5	1435.2	1829.75	1945.57	1977.43	1309.8	1698.3	1561.56
9	3452.8	2044.59	3963.37	2000.32	2663.25	2875.6	4036.75	2185.92	3207.24	2043.34	1914.96	3877.5	2833.83	3576.69	3942.12	1650.39	1550.36	2430.49	2897.75	2215	3181.36	4560.08	2922.92	1821.13	1885.55	1590.3	3053.61	1835.29	2358.4	2128.98	1980.3	1828.2	1533.28	1541.1	1174	1886	1757.7	993.95	1219.2	1417.5	2492.1	2733.94	1618.68	1668	1700.6	1948.32	1064.24	1088.36	1378.14
10	3490.84	1344.2	3717.77	2488.68	2495.08	2261.56	3799.53		3224.52	2238.92	2349.81	3826.02	2766.91	1940.4	4334.84	1840.44	1577.68	2499.77	2699.32	1516.06		3702.7	3293.63		1709.4	1350.38	3169.44				2135.04	1235.43		976.14		2036.33	2384.28	1339.2	1359.3	1268.46	2343.6	1875.44	1025.64	2411.52	1753.29	2362.62	1053.98		1162.24
11	2490.49		3707.47			2289.81						2927.21	2721.02		3165.35	1649.34	1194.12	1230.5							1992.15		3317.12				1905.62	945.27				1812.32	2047.56	1044.93			2451.4			1639.64	1940.12		1056.48
12																																					1299.97	840.36							1685.1
13
14
15
17
Figure 5I - Klp9-mCh intensity (AU) throughout anaphase B progression
Time of anaphase B (min)	wt																																					Dis16E
0	1047.84	1319.36	1457	866	1927.6	879.06	1658.16	1244.97		916.48	1123.12	1333.62	1199.25	664.05	1138.98	644	600.75	1265.64	905.85	1300.18	871.15	765.6	739.17	1211.25	1059.68	1824.76	2404.02	657.72	1827	1114.08	680.16	393.68	1388.4	1358.5	1070.16	485.52	770.57	930.74	1417.68	1374.75	1755	1632.68	1612.62	1979.74	1095.6	1425.69	1681.02	984.72	3063.24
1	1530.9	2134.4	1118.34	1571.13	2244.48	814.9	2241.47	1949.28	1766.28	1443.25	1974.4	3287.76	2449.2	1031.94	1764.36	1088.75	1577.98	1717.56	1203.21	1354.64	1950.92	1320.6	844.13	2253.98	1050.6	2106.02	2397.57	1426	2428.64	1662.25	1353.4	1309.77	2162.16	1773.72	1909.68	961.4	984.41	2015.54	1872	1842.12	2213.28	1525.2	2457.84	2286.6	2043.3	1890.4	2793	1893	3147.01
2	1668.35	2640.33	1277.16	1426.92	2261.76	991.2	2882.25	2721.8	1920.66	1732.9	1950.92	2478.6	3515.28	1800.74	1627.92	1518.9	1405.8	2247.5	1539.08	1602.9	2306.88	1482	1159.88	2678	1091.34	1881.78	1939.3	2072.96	2161.5	1596.8	1205.28	2077.13	3931.42	1918.9	2219.43	2183.22	1929.52	1805.65	1961.76	1946.88	3557.29	1505.35	3267.64	1413.84	1559.25	1915.52	2416.35	1781.52	3448.65
3	2737.14	1982.2	1330.45	1336.92	2166.64	365.39	2403	2256.16	1817.4	1870.17	2789.22	2919.2	3321.6	2199.8	2422.2	1432.2	2029.27	2152.72	1468.04	1581.84	2580.48	1763.3	1117.48	2452.65	996.32	2104.19	2366.98	2702.27	2306.25	1560.6	1611.96	2615.45	3426.57	2159.4	1714.95	2409.96	2624	1940.64	2053.32	2176.2	2404.68	1717.87	2657.6	1611.46	1708.5	2052.6	2126.25	1958.96	3814.44
4	2294.14	2649	1778.09	1342.88	1842.64	1155.33	2610.48	2380.21	1997.1	1987.38	2483.63	2592.04	2656.8	1891.44	2393.64	1311.38	2008.8	1728.94	1550.13	1664.04	2399.94	1457.8	955.71	2931.68	1059.87	1956.5	2080.35	3142.24	2004	1371	1111.1	3013.59	3183.6	2293.6	2010.82	1837.68	3024.12	1499.4	2101.52	2307.24	2391.41	1391.95	3349	1424.31	1844.19	2087.44	2030.73	1620.32	2981.52
5	2769.62	3359.66	1802.25	1369.4	2422.56	1238.74	2981.16	2502	2468.07	1596.36	2125.62	3583.4	2828.25	2090.56	2432.43	1643.52	2303.33	1739.52	1871.1	1838.16	2481.36	1467.8	1356.8	1937.64	1196.8	1965.28	2116.96	2356.2	2225.04	1482	1728.25	3318.51	2955.42	2176	2139.28	1869.38	2467.29	1749.32	2186.1	2675.28	2147.31	1567.35	2975.48	1446.25	2057.33	2180.4	1939.59	1785.6	3297.24
6	2594.25	3082.86	1599.84	1919.76	2080	1157.39	3258.76	2587.2	2048.69	1883.45	2884.2	3210.79	3240.6	1997.58	2111.4	1421.58	2252.25	1837.87	1909.68	1772.71	2198.52	1849.89	1221.39	1758	1340.91	1899.99	1542.84	2385.2	2582.1	1467.06	1472.31	2937.6	3110.4	1635.75	1824.95	2358.4	2299.08	1710.28	2139	2567.4	2357.64	2244	3095.4	993.54	2017.2	2350.08	2038.56	1861.47	3667.32
7	2996.4	3349.37	1693.53	1826.84	1919.55	1143.99	4253.65	2359.39	2237.28	1974.72	2722.4	3084.5	2980.8	2135.1	2441.88	1664.7	3198.72	2045.44	1662.5	1928.31	2246.4	1993.42	1297.17	1701	980.92	1979.64	2213.25	2926.48	2785.97	1706.46	1332.81	3194.31	2873.16	1887.84	1719.33	2741.11	2534.53	2050.68	2138.05	2548.26	2289.07		3181.5	1999.37	1361.71	1949.22	2103.92	2030.77	2885.64
8	3039.7	2849.2	1651.2	2037.76		1353.56	2174.51	2306.07	2413.94		2437.32	1855.63	3707.6	2084.95	2793.7	2042.82	2762.84	2597.1	1616.69		2718.13	2139.79	1057.32	1678.56		1859.68	2368.12	2973.32	2447.76	1600.56	1459.6	2519.4	3192.14	2390.85	2018.68	2815.9	3022.32	2616.7		2552.82			2789.64	1759.8		948.28	2499.77
9	1663.2			1582.7		1257.72		2579.08			2550.32		3129.75	2092.44	2806.44	1168.5	2559.9	2933.7	1906.76		2643.68	2739.8	1228.36	1802.68		1820.51	2581.16	2995.65		1857.6	1050.18	3995.46	3393.04	2007.78	1635.9	2600.74	3053.22						2548.42	1467.9			2293.76
10						1354.5											1135.77	2889.6			2965.59	2621.36	1097.2	1394.82		1506.75	1913.3	3021.68		1582.4		3952.26		2411.48		2831.85	2620.44							1562.88
11
12
13
14
15
16
17
18
19
20
Figure 5K - Mean Klp9-mCherry intensity (AU) at the anaphase B spindle
wt	Dis16A	clp1Δ	Dis16E clp1Δ
2776.42	846.123	2107.93	1495.13
2510.22	948.403	2122.98	1966.48
1620.75	129.931	1287.57	1639.28
1408.63	612.192	1727.38	1048.93
3162.36	655.455	1885.57	2028.29
3104.83	808.972	1880.48	1213.03
2091.61	675.44	1099.31	1116.82
1867.63	865.787	1315.04	1083.06
2536.23	989.834	1377.39	936.03
2666.15	584.255	1427.38	1173.11
2612.63	596.017	1621.12	1825.53
3160.27	995.563	1311.13	1147.59
1686.7	1051.95	1098.76	1568.17
1747.29	1078.55	1390.93	1569.72
2140.7	933.87	1956.72	1023.63
1250.98	1253.7	1265.67	1027.68
3167.02	767.334	882.555	976.949
2466.75	722.001	670.346	1501.93
2291.99	1078.72	1553.05	1220.79
1818.18	630.974	1209.38	1157.14
2543.97	859.571		2003.22
3292.9	557.256		1984.61
3177.4	284.79		1751.92
2080.13	370.974		1461.77
2517.17	898.025		988.368
1588.22	1042.85		1683.5
2615.41	935.857		1440.55
2340.54	1011.94		927.617
1793.35	1018.66		1697.97
1846.39	919.915		1275.16
2431.32
2135.34
1200.58
1712.12
1268.86
1838.64
2024.09
1732.55
3514.9
2592.02
2552.74
3488.1
1572.75
1386.11
2132
2926.18
2318.03
3204.48
3122.84
2992.94
1840.51
1843.07
1454.19
3144.24
1960.16
1922.01
2137.54
[truncated: 138 more columns]
