# Supplementary material for: Kinesin-6 Klp9 orchestrates spindle elongation by regulating microtubule sliding and growth
Source: eLife. 2021 Jun 3;10:e67489. doi: 10.7554/eLife.67489 (PMC8205488; doi:10.7554/eLife.67489)
Supplement: Figure 5—source data 2. [file elife-67489-fig5-data2.xlsx]

## Sheet: Figure S5
Figure 5 - figure supplement 1A - Anaphase B spindle length (µm) as a function of time (min)
Time of anaphase B (min)	wt																				clp1Δ
0	2.83521	3.36381	2.30755	2.58488	2.75274	2.84872	2.94156	2.91973	2.49928	2.86217	2.13467	2.60461	3.36	3.51272	2.86217	3.15163	3.17591	1.87275	2.4	2.4	2.32964	3.01887	2.57992	2.02386	2.26274	2.52982	2.75274	2.30755	2.98905	3.0568	2.68209	2.44229	2.4	2.75274	2.42124	2.60461	2.42124	2.57992	2.66293	2.14662	3.0568	2.37857	2.86217	2.24	1.6	1.8659	2.5044	3.07766	2.29085
1	3.89626	4.5817	3.64856	3.23975	3.64856	3.73524	3.87319	4.15076	3.73524	4.39345	3.10664	4.03822	4.5817	4.88459	3.9061	3.50907	3.87319	4.15384	3.60976	3.2358	2.62419	3.73181	3.36	2.68209	3.42041	3.21994	4.098	2.32964	3.85331	3.59555	2.95025	2.72	3.29848	3.21994	3.26337	3.89297	2.88444	3.45392	3.01887	3.52363	4.25131	4.22412	3.55258	3.2358	3.26337	2.60461	3.32938	3.69389	3.2946
2	5.0241	5.76	5.63645	5.46816	5.90268	5.0241	4.30813	5.41406	5.34745	5.5171	4.5817	5.77996	6.27477	5.93943	5.21168	4.86621	6.80706	5.00112	4.66476	4.19981	4.32296	4.86621	4	4.22715	4.36715	3.40165	4.77326	3.21596	4.96	4.07922	4.26033	3.59555	3.73181	3.95171	4.30813	4.64	4.36715	4.46282	3.65207	4.29921	4.87409	5.09243	4.98317	3.55258	4.82394	3.53452	3.84666	4.65102	3.3752
3	6.13241	7.49955	7.88071	6.8352	7.84653	6.44981	6.37194	7.25667	6.70092	8.48	5.87006	7.81383	7.41199	6.79011	6.24	6.4359	8.74016	6.89672	6.43192	4.9419	5.32586	6.2482	4.10112	5.37848	5.87442	4.29325	6.147	3.86658	5.46816	5.43294	5.79765	4.50848	5.44	5.00879	5.36418	5.18212	4.60678	5.67493	4.83719	5.10247	6.47951	7.12853	5.7109	4.55087	5.60914	4.15384	4.57611	5.86788	4.5817
4	7.34084	8.73137	8.64592	8.10175	8.85799	7.62144	7.81383	8.97427	8.62517	8.92852	7.01815	8.27836	8.97285	7.9438	7.9968	7.45847	10.2525	9.28552	7.5353	6.8483	6.01225	6.97607	5.56561	7.29712	6.92266	5.7355	7.29712	3.65557	6.84082	5.56561	7.10515	6.01225	6.15532	6.52871	5.71762	5.68169	5.31865	6.30327	5.3761	6.2482	6.9319	7.39643	6.42595	4.61788	6.9097	4.54805	5.0241	7.0636	5.11249
5	9.27034	10.3754	9.44542	9.82405	10.6385	8.50412	8.99564	10.0749	9.96634	9.57062	7.89369	9.96634	10.1016	8.89692	9.15921	8.30768	11.0527	10.08	8.10175	8.0399	7.34084	7.58778	6.59697	8.19912	7.9438	6.79765	8.65332	5.79986	7.47048	6.32961	7.55227	7.23547	6.65877	6.98524	6.57754	5.65459	5.58856	7.98879	5.85915	6.90229	7.10155	8.67253	7.21953	5.87006	8.16	5.5725	5.5541	7.56751	5.82409
6	11.1634	10.9363	10.2512	10.7629	11.1082	9.39651	9.63328	11.1335	11.0967	10.1205	9.66644	10.5272	11.3634	10.1458	10.3754	9.58532	12.2115	10.8847	9.68496	9.09611	7.9196	8.82469	7.8449	9.30892	8.83484	6.79765	9.02406	6.1574	8.61626	6.8352	9.31991	8.70494	7.10515	7.79251	7.26372	7.16436	6.30327	8.32154	7.2	8.62517	8.91417	8.97285	7.64827	7.0835	9.18852	6.1574	6.23179	9.30204	7.02908
7	12.0946	12.7006	10.2712	12.1642	12.3366	9.84358	11.7183	13.079	13.1258	11.424	9.82275	10.9749	12.224	11.2468	10.4834	10.4405	13.2569		10.3407	10.1458	8.82324	9.18155	8.19131	9.55548	8.70494	7.96312	9.98943	6.68563	9.27034	7.95668	9.49813	9.25929	8.52066	8.65924	7.60295	7.19111	6.36993	9.52773	8.89692	9.18155	8.87387	10.0813	8.96714	7.69332	10.4785	8.02556	7.2549	9.13262	7.38777
8	12.3242	14.219				11.2057	12.2041				11.2057	11.54	12.481	11.9931	11.3701	11.801			10.8387	11.1047	9.44542	10.4699	9.86955	10.306	8.64569	8.05263	10.3815	7.74142	9.74819	8.57606	10.4654	9.56393	8.42093	9.05804	8.02556	8.21004	7.37043	10.311	9.75344	9.7718	9.81232	10.9052	9.82405	8.75333	10.7612	8.26598	7.93252	10.245	8.73137
9		14.6232				11.8799							13.398	12.6119		13.0858			11.2342	11.8497	9.76524	10.4479	9.63562		9.68311	9.51529	11.114	9.1214	10.024	9.1648	10.6984	10.103	9.44542	9.08062	9.17039	8.35224	7.37043	10.8848	10.5272	9.9698	10.1609	11.6445	10.1319	9.21078	10.7448	9.25929		10.462	8.65924
10		14.787				12.4471													12.2377	12.0723		9.7718	10.4903			9.36656	11.0214	8.77086	10.4479	9.71926	10.459	10.0519	9.79535	9.75924	9.96634	8.22406	8.67253	11.5335	10.4086			11.628		9.4305		9.31442		10.634	10.6385
11																				13.0936		10.117	10.6868			10.1689	11.4523	9.9779				10.7985	9.95221	9.90088		9.06227	8.95142	11.5654				11.3773		9.62663		9.68496			10.5757
12																																	10.9457			8.49643	8.87531					11.5942		10.0227		9.01128			10.4674
13																																	11.6581				9.16899												10.8988
14																																					9.23298												12.6835
Figure 5 - figure supplement 1 - anaphase B spindle elongation velocity (µm/min)
wt	clp1Δ
1.29945	0.886547
1.22969	0.700953
1.2018	0.806871
1.41673	1.11222
1.42386	0.817888
0.978894	0.725961
1.23099	0.811228
1.44915	0.743024
1.5116	0.779284
1.2045	0.685427
1.14376	0.829998
1.13664	0.987155
1.14162	0.962982
1.02551	0.831128
1.11684	1.01709
1.12497	0.634069
1.50604	0.801744
1.54188	0.553614
0.983413	0.926823
1.02263	0.777837
	0.891892
	0.838968
	0.690324
	0.702205
	0.713905
	0.503502
	0.471991
	0.873069
	0.881903
	0.907755
	0.789921
	0.764708
	0.823356
	0.693604
	1.0609
	0.695598
	0.653955
	0.821857
	0.711589
	0.900346
Figure 5 - figure supplement 2 - Anaphase B bundle length (µm) as a function of time (min)
time (min)	cut7-24																																							cut7-24 clp1Δ
0	1.0245	1.57582	1.37637	0.932952	1.15378	1.31939	1.37637	1.12	1.37637	1.47513	1.28	1.36704	1.47513	0.861626	1.28	1.47513	1.07331	1.01193	0.861626	1.35764	1.0245	0.8	1.28996	0.861626	1.24964	1.24964	1.21852	1.16482	1.50944	1.0245	1.21852	1.28996	0.715542	0.96	1.15378	0.715542	1.16482	0.96	0.96	0.715542	1.24964	1.16482	1.01193	0.861626	0.678823	0.576888	0.861626	1.07331	1.13137
1	1.73066	2.00479	1.57582	1.47513	1.94648	2.22279	2.08615	1.63169	2.049	2.14662	2.13467	1.82428	2.049	1.6	1.94648	2.57992	1.82428	1.67045	1.92666	1.73066	1.8659	1.28996	1.37637	1.16482	1.6	1.95305	1.43108	1.78885	1.87275	2.08615	1.67045	1.78885	2.14662	1.51789	1.6	1.58392	1.82428	1.51789	1.78885	1.28996	1.97909	1.28996	1.16482	1.0245	1.31939	0.905097	1.01193	1.31939	1.47513
2	2.03647	2.02386	2.22854	1.92666	3.21596	1.72325	2.62419	2.73408	3.43535	2.32964	2.64847	2.63879	2.97617	1.35764	2.57992	2.89772	2.29085	2.17624	2.15258	1.78885	3.0735	2.13467	1.73066	1.8659	1.70082	2.49928	1.82428	2.63879	2.26274	2.57992	2.7247	2.049	2.97617	2.00479	1.81019	1.6	2.75274	2.22854	2.44229	1.8659	2.48387	1.82428	2.14662	1.15378	1.57582	1.13137	1.15378	1.6	1.73066
3	2.17624	2.32964	3.0568	2.93721	4.0287	2.37857	3.65557	3.65557	3.87319	2.14662	3.39411	3.23975	4.30813	2.52982	3.04	4.01278	3.95171	2.52982	3.00613	2.63879	4.07922	2.37857	1.81019	1.97909	1.63169	2.4	1.73066	3.42041	2.73876	3.42041	3.18798	2.75274	3.73181	4.22715	1.94648	1.92666	3.23975	2.63879	3.36381	2.29085	2.00479	1.50944	2.49928	1.58392	1.44	1.50944	1.28	1.78885	2.08615
4	3.1435	2.44753	3.86988	3.23975	4.52548	2.84872	4.61788	4.36715	4.50848	3.15569	4.01278	4	4.93931	3.23975	3.71117	3.85331	4.50564	3.54175	2.91973	3.86988	4.75176	3.44651	3.21596	2.56	1.76	2.29085	2.29085	4.11359	3.69389	4.84248	3.54175	4.19981	4.44558	4.50848	2.79886	2.36237	4.15076	3.39411	4.81332	2.52982	2.72	2.14662	2.88444	1.57582	2.17624	1.70082	1.13137	1.6473	2.03647
5	3.86658	2.08	3.86658	3.9061	5.71762	3.46133	5.18212	5.41406	5.00879	4.16	4.65102	4.44846	5.79765	4.48286	4.36715	4.37008	6.29107	3.95818	3.54175	4.42538	5.05964	3.86658	4.1876	2.57992	2.29085	2.5044	3.10664	4.96774	4.30813		4.22715	4.43694		5.36656	3.1435	3.09011	4.37008	4.07922	5.82409	2.52982	2.79886	2.17624	3.0735	1.57582	3.18798	1.37637	1.82428	1.78885	2.26274
6	4.81332	2.89772	4.66476	4.54805	6.97057	4.15076	6.08842	5.3761	5.02155	4.72745	5.4494	4.61511	5.94589	5.10498	4.34659	4.93931	6.89672	4.92894	4.42538	4.75176	5.37848	4.36715	5.00112	3.18798	3.07766	2.66293	3.1435	5.27757	4.72474		4.30813	5.08488		6.51497	3.07766	3.84666		4.23623	6.57754	2.95025	3.40165	2.86217	3.29848	2.32964	2.79886	1.73066	2.03647	1.70082	2.15258
7	5.52637	2.83521	5.52637	4.48286	6.48346	4.30813	5.92	6.59697	5.21168	4.85831	5.4494	4.8	6.30327	5.95449	5.21168	5.47284	7.60295	5.74442	5.18212	5.5725	5.68169	4.30813	6.13241	4.10112	3.2	3.50907	5.05205	5.31865	5.05964		4.8	5.71762		7.24431	3.73524	4.42538		4.73827	6.792	3.54175	3.87319	3.21994	3.23975	1.97909	2.68209	1.73066	2.049	1.67045	2.15258
8	5.7355	3.36381	5.76888	5.43058	7.15542	4.26033	5.92864		6.44981	5.67041				6.5892	5.58856	5.79765	6.81269	5.82409	5.68169	5.76888	6.51497	4.88459	6.4716	4.72745	4.49141	4.42538	4.40218	5.74442	5.76888		5.1524	6.404		7.02544	4.50564	4.97031		5.31865	6.94665	3.39034	3.28293	3.42041	3.80316	2.30755	3.07766	1.70082	1.95305	1.93329	2.62419
9		4.40218	6.44186	5.7711		4.5845			6.4716	5.93727				6.79765	5.65685	6.3053	7.40335	6.44186	5.58856			5.28242	6.4716	4.97031	4.96	4.77326	4.85831		5.24839		5.66138			7.58947	4.60678	5.60914		5.82409	8.26598	3.49445	3.32938	4.19981	3.3409	2.44753	3.3752	2.14662	2.08615	1.82428	2.71529
10		5.22394	6.52675	5.31865					6.9097	6.4716					5.95449	6.82208		6.07157	6.404			5.85915	7.0636	5.19199	5.14245	5.22394	5.46816		6.52871					7.68167	4.96258	6.2482				3.44651	3.42415	3.68	3.95818	2.64847		1.82428	2.26274	2.14662	2.95025
11																																								3.86658	4.22715	4.01278	4.11359	2.57992		2.08615	2.4	2.13467	2.57992
12																																								3.79305	3.79305	4.01278	3.73524	2.84872		2.14662	2.24	2.57992	2.97617
13
14
15
16
Figure 5 - figure supplement 4 - Klp9-mCh intensity (AU) as a function of time (min) during anaphase B
time (min)	wt																														ase1Δ
0	1737.11	741	1068.6	1078.14	1018.96	614.2	1794.22	978.18	914.3	814.26	1079.7	864.24	1747.2	775.1	615.3	1537.2	1262.7	797.28	807.82	1234.8	506.77	819	1257.36	1127.11	881.658	1447.04	970.02	680.36	751.52	465.75	1149.88	1155.2	4375.41	1015.2	1236.9	440.92	1297.24	1519.56	1270.36	833.08	1263.08	1351.08	1697.96	1306.04	1581.3	421.68	971.88	1381.65	1520.14
1	1764	1037.76	1396.95	666.19	874.95	1645.77	1395	1091.2	1646.74	868.56	1838.97	1095.82	1971.84	1886.34	1892.4	1544.66	2070.18	963.96	960.96	1279.25	1113.56	1389.18	1572.96	1766.4	780.1	1606.5	1306.06	826.88	843.76	1094.4	1835.05	750.12	2823.16	859.18	1040.06	708	890.6	2108.68	1224.17	1322.75	1443.2	1817.55	1518.55	1085.44	1762.2	1053.01	1814.6	1153.26	831.6
2	2637.39	1617.89	1559.06	1068.78	2139.04	1578.5	1966.48	1494.4	1395.87	1491.2	2414.62	1394.72	1696.32	1773.31	1945.35	1748.24	2352	1294.67	1925.58	1769.43	1305.36	1295.16	1601.25	2099.5	991.25	1996.42	1419.32	1434.51	973.56	1251.95	2274.8	2155.52	3972.12	2084.88	1204.98	738.72	1332.8	2295.1	2213.06	1500.88	1306.22	1973.94	1657.26	1151.88	1732.64	1273.28	1535.82	1268.4	1638.36
3	2940.63	1317	1675.08	1193.6	1797.25	1912.62	1577.46	1893.15	1647	1314.54	2545.2	1317.2	1492.92	1798.5	2039.88	2415.16	1918.62	1837.08	1782.96	1985.34	1387.68	1740.96	2193.96	1615.09	1092.92	2212.63	1948.89	960	1161.54	2128.56	2123.95	867.36	3536.68	1575.91	1972.2	1576.25	1163.5	2200.59	1502.55	1200	1413.72	2732.08	1788.91	1425.44	1866.36	1049.75	1292.04	1111.36	1871.65
4	2864.04	1425.44	2408	1042.72	1814.4	1607.68	2340.7	2449.83	2383.4	1609.92	2623.5	1310.52	1451.36	1901.46	2376	2239.83	1906.8	1053.5	1423.33	1870	1572.96	2012.95	1898.8	1500.66	1094.4	2139.54	1780	1203.3	1303.83	1937.36	2244	982.6	4985.19	2258.28	1041	1323.54	770.57	2429.5	1972.2	1662.72	1554.3	2482.4	1570.8	1701.46	1977.01	1168.5	2373	1370.88	689.85
5	2112.32	1443.2	2036.42	1243.92	1688.24	2401.2	3188.52	2050.92	2671.5	1613.04	2194.62	1527.12	1860.55	1950.48	2206.44	2196	2071.52	1600.56	2131.5	1568.94	1704.78	2275.3	2104.49	1666.56	1221.08	2153.03	1812.03	1618.2	1289.04	2224.8	2455.9	634	5482.6	2790.51	1101.42	1693.54	1372.5	2234.5	2183.78	1784.23	1884.78	2507.45	1834.3	1426.14	908.01	844.2	2180.5	793	1322.4
6	2718.6	1431	2173.66	1666.5	2118.2	2361.71	2108.7	1593.34	2416.5	1814.73	2798.2	1646.88	1878.92	2026.22	2397.2	2778.07	1943.81	1581	2223.6	1662.52	1734.94	2128	2688.4	1702.21	997.75	2103.12	2150.28	1602.54	1292.56	2054.61	2661.62	953.47	5711.62	2332.4	1883.09	1662.96	913.5	2415.69	2308.6	888	1318.13	1894.2	1437.87	1347.06	1386.21	1776.44	2091.24	1371.5	1557.51
7	2569.59	1784.8	2416.23	1725.84	2195.55	2516.61	2860.56	1696.94	2425.22	1827.78	3131.59	1748.7	1705.65	2243.58	2615.76	2955.68	1800.63	1583.4	1832.64	2041.8	1866.76	2555	2712.15	1398	1470.1	2256.8	1468.12	1278.66	1542.24	2482.35	2995.2	1016.6	2924.67	793.95	2627.4	2059.2	1711.2	2932.8	2315.25	1657.26	1423.32	1851.3	1384.83	1932.42	1738.11	969	2669.76	1314	1601.61
8	1901.06	1931.48	2340.5	1925.04	2057.6	2591.92	2910.06	1824.76	2583.04	1948.14	2861.04	2079.04	1323.52	2584.78	2484.72	2664.75	2818.92	1579.16	1896.3	1696.76	2563.38	2684.5	3065.9	1370.25	1415.14	2472.54	1097.8	1706.8	1644.3	1816.32	3664.2	1398.96	2846.16	2545.52	1568.16	2165.28	2482.35	2749.22	1748.23	1193.82	1540.44	1785.6	1763.64	2142.07	1353	1237.74	3283.72	913.68	1576.85
9	2687.8	1997.89	2109.24	2352.46	2817.52	2729.1	2569.84	1747.25	2617.44	1603.8	3451.36	1802.34		2497.83	2400.96	2237.13	2227.2	1525.86	2181.48	1978.2	2427.3	2785.95	2966.6	1427.1	1299.52	2797.36	873.24	1500.4	1346.7	2083.25	3814.1	1350.36	3179.52	2561.68	1313.96	2806.19	1727.18	3014.96	2652.2	2020.41	1462.4	2043.03	1587	1995	2016.76	1415.04	3679.28	1150.05	1555.91
10	2221.8	1720.4	2287.39	1905.57	2757.05	2202.18	2135.98	2051.6		2199.12		1956.62		2456.4	2743.78	1521	1866.56	1353.4	2018.64	2255.5	2342.4	1127.28	3407.21		1222.4	3264	1264.3	1765.5	1386.44	2709.18	3212.8	1701.36	3350.68	2403.96	1576.44	2896.85	1686.32	2874.69	2901.08	2229.99	1752.24	3536.64	1799.92	1813.95	1902.58	1620.81	3499.2	1024	1664.1
11	2602.66	2016	2609.96	2089.36	1607.2			2267.28				1865.5		2081.15	2955		2139.5						3612.84		1180.8	2660.49		1655.4	1420.02	3068.17	3091.2	1742.5	2382.6	2651.88	1520.96	2863.17	1886.04	3380.86	2501.13	2213.7	2154.6	2449.68	1909.3	1743.5	1750.66	1531.4	3445.2	891.33	1853.25
12			1991.98					1669.5							2869.44								3199.65		1325.94			1039.18		1629.32	3178.14	1608.9	1826.64	2406.72	1479.68	1617.28	2430.75	2689.4	2531.2	1680.8	1793.88	2699.59		1623.93	1851.96	1470.48	3597.9	999.57	1747.41
13															2747.56																2787.48	1714.44	1539.28	2855.25	1638.3		2638.46	2666.14	2208		2377.02	2766		1436.8			3040.62	867.47	1767
14																																	1005.98		1900.68		2181.12	2479.12	1870.5			3096.72		2117.54			3242.31	684.48	1371.12
15																																	1388		1810.3		1732.5	2582.79	2282.25			2455.44		1189.88			2029.5	1002	1374.32
16																																			1495.92			2427.57	1747.07			2675.97		1168.44				998.2	1625.9
17																																						2577.21	2304.37			3166.46		2676.48					1211.7
18
19
20
[truncated: 65 more columns]
