# Supplementary material for: Kinesin-6 Klp9 orchestrates spindle elongation by regulating microtubule sliding and growth
Source: eLife. 2021 Jun 3;10:e67489. doi: 10.7554/eLife.67489 (PMC8205488; doi:10.7554/eLife.67489)
Supplement: Figure 6—source data 1. [file elife-67489-fig6-data1.xlsx]

## Sheet: Figure 6
Figure 6C - Klp9-mediated microtubule gliding velocity
MT gliding velocity (µm/min)
2.41702
3
2.01081
2.37592
1.28
2.50435
2.65438
2.98286
2.20541
2.46372
2.69189
2.6094
2.4
2.38756
1.65405
2.45581
2.3615
2.32421
2.41341
2.3814
2.49135
1.42222
2.48276
Figure 6F - MT growth velocity (µm/min) as a function of Klp9 concentration (nM)									Figure 6G - Microtubule length (µm) as a function of Klp9 concentration (nM)								Figure 6H - Catastrophe frequency (min-1) as a function of Klp9 concentration (nM)
0 nM Klp9	10 nM Klp9	25 nM Klp9	100 nM Klp9	250 nM Klp9					0 nM Klp9	10 nM Klp9	25 nM Klp9	100 nM Klp9	250 nM Klp9				0 nM Klp9	10 nM Klp9	25 nM Klp9	100 nM Klp9	250 nM Klp9
1.26061	0.72	1.21379	1.58118	1.08679					4	4	5.6	6.56	7.84				3	0.48	1.6	0.248963	0.685714
1.04727	1.54839	1.28	1.536	1.05974					2.72	3.2	3.68	1.92	6.24				0.458015	1.83674	0.701754	0.449438	1.41732
1.24235	1.66154	1.26316	1.58118	0.993103					2.08	4	1.76	3.52	2.72				2.30769	0.289855	0.258621	0.622837	0.533333
1.26792	1.57808	1.71429	0.990476	1.46667					2.4	4	1.92	3.04	7.52				1.23711	0.85	0.540541	0.5	0.357143
0.685714	1.86667	2.25882	1.1234	1.70323					0.8	1.44	1.92	2.56	5.92				0.875912	0.967742	0.670391	0.490998	0.983607
1.18356	1.54839	1.41176	1.63019	1.52195					1.44	1.12	4.16	2.88	3.36				1.12149	0.833333	0.743802	0.821918	0.991736
0.822857	1.35529	2.21538	1.92	1.92					1.44	2.56	1.76	2.88	1.12				0.888889	0.504202	1.71429	0.512821	1.64384
1.57808	1.46286	1.50857	1.2	1.92					2.72	3.04	2.08	0.96	0.96				0.697674	1.25	0.674157	0.765957	0.944882
1.30909	1.13684	1.23871	2.16471	1.92					2.08	3.36	2.08	4	2.72				0.631579	1.39535	0.612245	1.01695	0.869565
0.872727	1.65	1.77778	1.35211	1.92					1.44	3.68	1.92	2.24	2.08				1.23288	0.930233	1.31387	0.491803	0.588235
0.940206	1.37143	1.52195	1.70127	1.82857					3.84	2.56	2.24	2.56	1.28				0.882353	1.93548	0.659341	1.18812	1.39535
0.813559	1.23077	1.29231	1.92	1.23871					2.4	2.24	1.28	3.52	1.28				0.625	0.41958	3.33333	1.875	0.542986
0.946479	1.2	1.06667	1.21081	1.6					2.56	1.76	5.6	2.88	0.64				0.491803	0.674157	1.03448	0.451128	0.851064
0.859701	1.04096	1.57377	1.08169	1.92					2.4	2.72	2.24	2.24	0.8				0.895522	0.745342	1.125	1.46341	1.22449
0.745631	1.54839	1.98621	1.37143	0.872727					2.88	2.08	1.6	0.96	2.4				0.689655	1.46341	0.645161	0.405405	1.04651
0.355556	1.72308	1.2	1.73333	1.66956					1.12	5.12	1.28	2.56	3.2				0.9375	1.53846	0.606061	0.540541	0.238095
0.993103		1.26316	2.53585	1.21165					4	2.24	5.92	2.4	3.2				1	1.62162	0.560748	0.666667	0.873786
0.857143	1.77231	1.19322	1.72308	1.41818					1.92	0.96	1.6	1.28	2.88				0.625	0.728745	1.14167	0.833333	2.72727
0.914286	1.2	2.10732	1.11304	1.38667					1.44	1.6	2.72	1.76	5.92				0.96	0.869565	0.535714	1.25	0.861244
0.774194	1.82857	1.27434	1.88571	1.46441					1.6	1.76	2.72	2.08	6.4				0.56338	1.06667	1.03448	0.833333	0.594059
1.32414	1.51579	1.21165	1.67619	1.56279					1.92	1.76	2.4	2.24	0.8				1.46341	0.833333	0.963855	0.229008	0.458015
1.03597	1.02857	1.74545	1.37143	2.08696					3.68	1.12	2.4	2.56	2.24				0.6	0.560748	1.30435	0.734694	0.839161
0.395876	0.738462	1.09474	1.74545	1.45116					1.6	0.96	1.12	4	2.08				2.80374	1.11111	1.12782	0.348837	0.240964
1.12941	1.10769	1.74545		1.70959					1.12	1.12	2.56	4.8	3.2				1.09091	0.857143	0.634921	0.930233	0.304569
1.07463	1.02857	1.58118	1.73115	1.02595					3.68	2.24	4.8	4.16	1.6				1.15385	0.666667	0.722892	0.526316	0.502092
1.21519	1.46667	1.40488	2.33514	1.2					5.92	3.2	3.2	4	3.04				0.863309	0.615385	0.504202	0.633245	0.277778
1.17073	1.43448	1.10769	1.82857	1.77778					1.6	1.44	4.16	4.32	1.76				2.22222	0.506329	0.666667	0.428571	0.263158
0.914286	1.16364	1.6	1.18356	2.05714					0.8	2.4	3.68	4.64	2.56				0.779221	1.57895	1.81818	0.272727	0.222222
1.06667	0.96	1.50588	1.11628	2.50435					2.4	2.72	1.76	3.04	2.24				1.10092	0.909091	0.733333	0.952381	0.666667
0.817021	1.12941	1.92	1.61684	1.39636					1.44	3.52	1.28	1.92	3.36				0.821918	1.11111	1.25	0.585366	1.60714
1.02731	1.33953	2.03636	1.96364	1.47692					5.92	4	2.08	0.96	2.56				0.909091	0.714286	0.540541	0.759494	1.81818
1.47692	0.847059	1.63019	1.77778	1.64571					2.24	4.8	1.76	4	1.76				1.01695	1.07143	1	0.991736	0.262009
1.02857	1.58981	1.33953	1.46441	2.25882					2.24	3.04	2.88	3.36	2.24				1.01124	0.375	0.692308	0.731707	0.229008
0.6	1.25217	1.76842	0.518919	1.2169					2.24	1.12	2.4	4.16	2.56				0.727273	0.43956	1.2	0.957447	1.17647
1.06667	1.44	1.49333	1.24675	1.38947					1.6	1.12	1.12	8.8	1.92				1.07143	0.882353	1.33333	0.631579	0.754717
0.864865	0.768	2.08696	1.75448	1.536					2.08	2.08	1.44	4.96	1.92				1.18812	1.07784	1.21111	0.666667	1.25
1.37143	0.96	1.78605	1.8	1.69412					1.44	4.16	1.12	5.92	3.04				1.22449	1.09091	0.497925	0.863309	1.29032
1.07865	1.50744	1.85807	2.56	2.13333					1.76	2.72	2.08	7.36	1.44				1.63636	0.740741	0.215054	1.39535	0.526316
1.44	1.344	1.53043	1.46087	2.10732					1.76	3.68	3.52	5.28	1.44				1.4876	0.555556	0.519481	1.05263	0.803571
1.37143	1.27059	1.40488	1.49333	1.63019					2.4	2.88	4.16	2.88	1.76				1.03333	1.01695	0.315789	0.206897	1.2766
1.13684	1.54286	1.28	2.24	1.42222					2.24	2.24	0.96	6.24	3.2				1.15385	0.789474	0.731707	0.769231	1.21212
0.872727	1.42979	1.74545	2.29091	1.39487					2.72	3.36	0.8	2.08	2.24				1.17647	0.571429	0.521739	0.727273	0.882353
1.20719	1.536	1.92	1.84615	1.48571					4	2.56	0.64	2.24	1.28				1.37405	0.521739	0.591133	1.04348	0.882353
0.533333	1.24675	1.25217	1.6	2.82353					0.96	3.36	2.08	0.8	1.44				1.42857	0.861244	1.23457	1.62162	0.731707
0.533333	1.68	1.35529	1.5	1.42222					0.64	2.88	2.24	1.28	1.76				0.923077	1.34831	0.215054	0.759494	1.03448
0.948148	1.2866	1.57091	1.2973	2.21538					1.76	1.12	2.56	5.28	0.96				0.833333	1.14833	0.28169	1.04651	1.04348
0.96	1.71429	1.54839	1.74545	1.3913					1.44	2.08	2.24	3.68	4				0.833333	0.9375	1.32353	1.0084	1.16129
1.32414	0.711111	1.57975	0.72	1.92					1.44	1.12	2.08	4.48	2.88				0.638298	2	0.775862	0.842105	0.594059
0.822857	1.69412	1.40488	1.37143	1.37143					0.96	1.6	1.76	3.36	2.88				0.571429	3.52941	0.714286	1.33333	1.05263
0.384	1.92	1.33333	1.39355	1.32683					0.8	2.4	0.96	3.36	3.36				0.882353	1.39535	0.782609	1.03448	1.17647
1.02857	1.16364	1.03784	1.32414	1.85807					1.44	1.76	1.44	1.76	2.72				1.88976	0.314136	0.472441	0.655738	0.882353
1.03784	1.5	1.05205	1.06667	1.45454					3.52	1.28	3.68	5.92	2.4				1.41176	0.679245	0.923077	1.04895	0.84507
1.30909	0.96	1.82857	2.02667	1.89091					2.24	2.56	0.8	6.88	3.2				0.967742	0.542986	0.652174	0.413793	0.359281
1.65517	1.54286	1.8	2.05714	1.6					1.76	1.92	0.64	4.64	1.92				0.015625	0.502092	0.700389	0.612245	0.372671
1.12941	1.44	1.48965	1.92	1.53277					1.6	1.44	1.6	4.16	3.52				0.014286	0.677966	0.25974	0.674157	0.030556
0.729114	1.39636	2.25882	1.92	1.66956					1.28	1.6	0.8	6.4	0.96				0.012346	0.677966	0.909091	0.96	0.909091
0.64	1.11628	1.6	2.21538	1.47692					2.08	2.56	0.8	4.8	1.12				1.60714	1	1.18812	3.75	0.875912
0.6	1.536	1.15663	1.64848	1.68421					1.44	1.28	1.6	7.04	2.72				2.11765	1.11111	0.865385	0.967742	0.754717
1.17895	1.09714	1.92	1.62712	1.73115					1.28	1.28	1.92	8.16	3.36				1.62162	1.03448	1.11111	1.25	1
1.2	1.536	1.92	1.61584	1.16364					1.44	1.6	1.44	4	2.4				1.07143	0.851064	0.97166	0.775862	0.434783
1.1234	1.10769	1.408	1.28	1.47692					4.16	2.08	4.16	2.24	4.64				0.487805	1.5859	0.447761	0.75	1.2
1.47692	1.2	2.61818	1.82069	1.4					2.72	1.28	2.08	5.12	1.44				0.916031	0.02765	1.81818	0.674157	1.09091
1.02857	1.6	2.0093	1.8	1.64571					0.64	2.72	1.92	3.68	3.04				0.794702	0.6	1.875	0.350877	0.652174
1.536	1.25217	1.44	1.66956	1.48454					1.44	1.92	0.8	3.2	3.52				0.803571	0.84507	0.247934	0.307692	0.271493
0.8	0.993103	1.83371	1.92	1.25217					2.4	1.12	2.72	3.04	2.72				0.449438	0.978261	0.23622	0.451128
0.654545	1.01053	1.30909	2.58461						1.92	1.92	2.08	3.2	4.32				2.0979	0.967742	1.01124
1.04727	1.23429	2.13333	1.39355	1.8383					2.4	1.92	2.24	2.72	0.96				1.39535	1.11111	1.76471
0.64	1.6	1.78605	1.48965	1.7					1.12	2.72	1.6	2.88	5.6				0.705882	0.769231	0.909091
1.09091	1.64571	2	1.5	1.73617					0.96	3.52	3.84	2.56	3.2				1.17647	0.909091	0.875912
2.05714	1.08169	2.304	1.40488	1.33069					0.64	2.72	3.36	2.08	2.24				1.28571	0.677966	0.689655
0.96	1.48965	1.12676	1.37143	1.92					1.12	1.76	5.28	5.76	3.52				0.882353	0.588235	0.538117
0.96	1.33953	1.51579	1.35075	1.84615					0.64	2.72	2.08	2.4	1.76				0.731707		0.869565
1.17073	1.61928	1.344	1.62254	1.408					1.28	2.24	2.08	2.24	2.08				0.9375		0.962567
	1.2	1.4	1.65926	1.78605					0.8	1.6	1.76	2.72	1.44				1.19205		0.764331
0.96	1.44906	1.89946	1.52727	2.19429					1.6	1.28	6.08	3.52	7.36				1.70213		1
1.32414	1.37143	1.536	1.96626	1.04186					2.72	2.08	2.88	2.72	1.44				2.30769		1.11111
1.11074	1.06667	2.4	1.71789	1.01053					0.96	1.28	3.04	4.8	6.08				1.13207		1.2
1.17551	1.6	0.872727	2.32727	1.6					1.12	3.04	3.84	3.84	2.08				0.382166		0.458015
0.872727	1.6	1.2973	1.46087	1.84615					1.76	2.24	1.28	1.44	1.28				0.740741		0.201342
0.96	1.10769	1.48965	1.8	2.4					0.96	1.92	3.52	1.76	2.24				1.45161		0.449438
1.12941	1.16364	2.24	1.70323	1.96364					1.28	2.88	1.92	2.56	1.28				0.833333		0.631579
1.10164	1.48732	1.18261	2	1.73115					1.28	1.76	2.88	5.76	2.08				0.621762
1.08387	1.10769	1.76842	1.5835	1.66154					1.28	1.6	2.72	4.64	2.56				1.04348
1.06667	1.06667	1.6	1.45116	1.32414					1.44	2.88	0.96	3.68	2.24				2.06897
0.853333	1.22353	1.88976	1.37143	1.24235					3.2	4	4.32	4	2.72				0.700389
1.06667	1.86047	1.47692	1.08	0.96					2.4	5.28	2.4	3.36	1.76				0.895522
1.05366	1.41474	2.50435	1.83371	1.152					1.76	1.6	2.08	4	1.76				1.39535
1.24235	1.84615	1.68	1.23509	1.34737					1.12	0.96	3.84	4.64	1.76				0.97561
1.33953	1.32414	1.65	1.72308	1.28					1.28	1.92	4.32	3.04	2.08				1.53846
1.41176	1.69412	1.74545	1.22707	1.57091					0.96	0.8	3.84	8.48	4				1.28571
1.6	1.06667	1.41176	1.83237	1.32923					1.6	4.16	3.36	3.68	1.28				2.6087
0.722581	1.37143	1.06667	1.8	1.152					1.6	1.12	1.6	1.12	2.24				1.46341
0.944262	1.2	1.51579	0.738462	1.6					0.8	0.96	1.6	4.96	1.12				1.01695
0.993103	1.47692	1.40225	1.39899	1.23871					0.8	1.92	1.28	3.2	3.52				1.33333
0.8	1.81132		1.06667	1.77778					0.8	2.24	3.84	7.68	1.76				1.66667
0.711111	1.55676	1.69014	2.1573	1.46087					1.44	1.44	5.28	7.2	2.24				0.472441
1.10769	0.505263	2.61818	1.23871	2.28571					1.28	0.96	2.56	5.76	3.84				1.07143
1.26792	0.6	1.95918	1.25217	1.26792					3.04	2.24	2.08	4.32	1.76				1.69014
0.917197	1.46667	1.66956		1.04348					2.24	3.36	4.32	4.96	1.92				1.39535
1.02857	1.94157	1.95	1.57975	1.12941					1.76	5.6	2.24	3.84	1.12				0.674157
0.984615	2.1906	1.2973	2.16	1.57091					1.44	1.92	1.28	2.4	2.88				0.967742
0.685714	1.81132	1.30909	1.63404	1.42222					1.6	1.28	1.28	4.16	1.44				1.2766
0.650847	1.2	1.2973		1.28781					1.12	1.76	2.4	4.96	1.44				0.594059
1.66956	1.3017	1.62857	1.86667	1.38947					1.92	2.4	3.84	2.4	2.4				0.967742
1.33333	1.65	1.42222	1.6	1.44					2.4	0.96	1.28	2.88	0.96				0.853081
0.590769	0.872727	2.05714	1.69412	1.54839					1.28	0.96	6.24	3.84	0.96				0.697674
0.772414	1.30909	1.56098	1.88853	1.34737					2.72	1.92	3.68	4.32	1.28				1.02857
1.17736	1.54286	1.55676	1.44657	1.77778					0.96	0.96	3.2	0.64	3.04				1.23288
0.886154	0.914286	1.06667	1.47692	1.37143					0.96	2.08	1.76	3.04	1.6				0.031111
1.152	1.46667	1.7194	2.08696	1.51579					2.24	2.24	4	2.72	1.76				1.15385
1.14495	1.52727	1.6	1.47692	1.6					1.76	0.8	2.08	3.52	1.6				1.19205
0.993103	1.06667	1.28	1.66531	1.44906					1.92	2.56	1.44	3.68	2.72				0.535714
1.01053	1.86269	2.34667	1.41818	1.49333					1.44	0.8	1.92	2.72	1.6
0.90566	1.37143	1.96923	2.07059	1.40488					2.72	0.8	1.6	1.6	4.64
0.771429	1.2	1.8	1.95556	1.51579					1.6	2.24	5.76	3.04	2.24
1.24444	1.64571	1.26942	1.67442	2.07059					1.28	0.8	5.44	4.8	2.88
0.872727	0.8	1.39843	1.70667	1.69412					1.12	4	6.56	3.04	3.36
0.847059	1.27552	1.46087	1.3377	2.21538					2.08	5.76	4	2.88	3.36
1.37143	1.54074	1.84615		1.40488					1.12	2.24	3.84	1.44	1.28
0.752941	1.65	1.44	1.23871	1.23564					1.44	1.12	3.2	4	2.08
1.37143	0.872727	1.12941	1.8	2.02105					1.44	3.68	2.24	2.72	2.08
0.778378	1.87826	1.41176	1.49333	1.26512					1.28	2.08	1.76	8	1.6
0.738462	1.3913	2.4	2.7	1.19255					1.76	1.76	1.6	1.44	2.56
1.09091	0.757895	1.37143	1.92	0.9					1.44	1.92	5.6	4.32	2.4
1.23871	0.654545	1.152	1.91186	0.984615					1.28	2.08	3.36	3.52	0.8
1.12941	1.23077	1.72174	1.63902	1.45454					1.92	1.28	5.6	4.16	2.08
0.834783	1.03784	2.07568	1.36216	1.6					2.88	10.4	4.8	1.92	2.4
	1.95918	2.48889	1.72973	1.10442					1.76	11.52	1.6	3.84	1.28
1.02857	1.83652	1.92	1.81333	1.47692					1.28	4.96	2.56	3.2	1.12
0.711111	1.12941	1.16129	1.46667	1.23871					2.4	1.76	2.72	1.12	6.56
1.12941	1.09091	1.37143	2.22609	1.55676					1.12	1.44	1.44	4.8	5.6
0.872727	1.22553	1.34737	2.02105	1.44					1.28	2.56	1.6	2.08	3.36
1.09091	1.42703	1.65926	1.55676	1.04348					0.96	1.76	3.84	0.64	2.08
1.74545	1.6	1.68421	1.73793	1.344					1.28	3.2	1.92	5.28	2.08
0.847059	1.4961	1.344	1.536	1.04727					1.76	1.92	1.76	2.24	2.88
0.888889	1.66956	1.10769	1.152	1.46087					2.88	2.72	0.96	1.6	11
0.96	1.58118	1.01053	1.54011	1.12941					2.24	1.12	2.24	3.04	1.44
1.92	1.12941	2.4	1.664	1.344					0.96	3.36	1.12	0.96	3.68
0.879389	1.23077	1.74545	1.54839	2.304					0.96	3.36	2.08	2.56	1.12
1.47692	1.55429	1.3017	1.44425	1.5					1.12	2.08	2.72	2.08	1.92
0.96	1.2	1.42979		1.87826					2.4	4	1.92	4	1.76
0.573134	1.84954	1.69412	2.28571	1.56735					1.44	0.96	2.56	2.4	1.76
0.672	1.536	1.28	1.92	1.69412					1.12	4.16	2.56	1.6	2.4
0.778378	1.52727	1.49333	1.89091	1.92					0.96	3.04	1.76	2.24	1.28
1.30909	1.89091	1.06667	1.81132	1.89091					0.96	1.6	1.44	5.44	1.6
0.609524	1.70667	1.6	1.61928	1.408					1.44	1.28	1.44	2.56	2.56
0.923077	1.77778	1.82069	2.08696	1.54161					1.44	2.4	2.24	2.08	1.6
0.925301	1.7194	1.53239	1.47692	1.54286					2.24	1.76	10.24	2.24	3.2
0.698182	1.18154	1.95918	1.792	1.25902					1.6	1.76	8	3.2	1.76
0.984615	0.888889	1.48188	1.39355	1.69412					1.28	3.04	9.12	2.08	1.6
0.6912	1.33953	0.932039	1.95	1.50857					0.8	3.36	1.92		2.4
0.886154	1.81333	1.6	1.40488	1.74545					1.6	2.56	2.56		4.16
1.02857	0.849558	1.56	1.27347	1.31765					1.12	2.24	2.72		1.6
0.933333	0.819512	0.909474	1.57808	1.68					1.44	2.4	1.92		1.76
1.04348	0.8	2.57561		2.04255					1.44	2.24	4.32		2.4
0.847059	1.35211	1.44		1.53043					2.4	4.16	1.44		2.24
0.8	1.48732	1.81622		1.50588					1.28	1.76	1.76		2.72
0.944262	2.27368	2.21538		1.536					1.76	2.88	2.56		3.68
0.573134	1.44906	2.13333		1.25902					1.28	2.08	4.48		3.04
0.772414	1.09367	1.90476		1.44516					2.4	1.12	4.16		2.24
0.75	1.2	1.77931		1.92					1.6	2.24	6.88		1.44
0.96	1.65	2.01482		1.8411					0.8	1.76	7.04		1.28
0.8	1.21905			1.97647					0.96	1.12	3.84		3.68
1.06667	1.23871	1.49787		1.37143					1.44	1.28	4.32		0.8
0.993103	1.47692	2.07568		1.32414					3.36	0.64	1.6		0.64
0.973913	0.847059	1.27059		1.63404					2.4	2.08	2.72		1.44
1.05495	1.12941	1.02524		2.74286					2.72	1.44	2.56		3.04
1.6	1.37143	0.685714		1.27552					1.92	2.4	2.4		3.2
0.96	2.05714	1.47692		1.48732					2.88	1.6	1.12		3.04
1.17073	1.13898	1.2		1.54074					2.4	3.36	1.76		2.72
1.06667	1.42574	1.6		1.45454					1.92	6.08	0.64		1.6
0.926897	1.37143	2.21538		1.26061					1.12	4.8	1.44		1.76
0.880734	1.49725	2.0093		1.84615					1.6	2.56	3.04		1.44
1.152	1.2	1.86667		1.2					1.92	0.8	1.28		1.28
1.10345	0.685714	1.76842		1.51579					0.96	0.96	1.6		1.28
1.8	0.564706	1.39355		1.55676					1.44	0.96	4.32		2.56
1.02857	0.489796	1.97863		1.63404					1.76	0.8	1.28		1.76
1.33953	0.673684	2.35102		1.08679					0.8	0.96	1.28		1.6
0.862921	1.37143	2.13333		1.37143					1.6	3.52	3.2		1.76
0.738462	1.3211	1.87826		2.32727					0.8	1.76	1.76		1.6
1.01647	1.2	2.66667		1.35385					1.6	0.8	3.04		1.6
0.993103	1.06667	1.82069		1.27152					1.76	1.76	3.68		6.88
1.18154	1.4	1.62581		1.47692					1.12	1.28	5.44		4.32
0.570297	1.03784	2.13333		1.39237					4.16	0.96	3.52		3.68
0.929032	0.768	1.87586							2.08	2.72	1.6		1.6
0.970787	1.74545	2.16							1.44	2.4	1.6		1.44
0.8	1.16636	1.8383							1.44	5.12	3.36		3.2
1.06667	1.46087	1.67339							2.56	2.4	1.28		3.52
1.25217	1.72308	2.21538							1.6		2.24		2.88
1.00465		1.23871							1.6		4		3.84
1.25217		1.61168							1.92		1.76		4.32
0.973913		1.57377							0.8		3.68		4.32
1.04096		1.58447							1.12		3.04		3.52
1.12941		1.51579							1.6		2.56		4.96
0.768		1.92							1.92		2.72		4.96
0.972152		2.24681							1.44		3.2		1.44
1.02857		1.92							1.12		0.96		1.44
0.923077		2.13333							1.12		2.24		2.4
0.872727		2.02105							0.96		8.64		1.6
1.17551		2.07568							2.24		2.24		2.24
0.993103		1.82069							2.88		2.88		3.36
0.857143		2.4							2.24		1.44		3.84
1.92		1.8							0.96		1.44		2.4
0.879389		1.40488							0.96		2.24		4.48
1.47692		1.99245							1.12		3.36		1.76
0.96		1.72973							2.4		1.76		2.4
0.573134		1.87826							1.44		3.36		2.88
0.672		2.05714							1.12		2.4		4.16
0.778378		0.993103							0.96		3.2		5.76
1.30909		1.6							0.96		2.24		1.76
0.609524		1.74545							1.44		3.52		4.16
0.923077		1.33953							1.44		1.44		3.36
0.925301		1.92							2.24		5.44		2.4
0.698182		1.81775							1.6		5.28		5.6
0.984615		2.112							1.28		3.2		3.84
0.6912		2.2069							0.8		3.36		2.24
0.886154		1.71429							1.6		2.08		3.04
1.02857		1.85807							1.12		1.92		2.88
0.933333		2.02105							1.44		4.8		2.4
1.04348		1.71429							1.44		1.28		4.32
0.847059		1.56279							2.4		2.88		4.16
0.8		1.40917							1.28		4		1.28
0.944262		2.03636							1.76		4.16		3.68
0.573134		0.893023							1.28		1.44		2.24
0.772414		1.70667							2.4		1.76		4.16
0.75		2.25882							1.6		2.4		3.36
0.96		1.57975							0.8		2.88		2.24
0.8		1.41176							0.96		0.96		3.52
1.06667		1.6							1.44		3.52
0.993103		1.97647							3.36		1.92
0.973913		1.44							2.4		6.4
1.05495		1.80332							2.72		1.28
1.6		1.66956							1.92		1.76
0.96		1.2							1.6		1.92
1.17073		1.6							0.96		5.44
1.29231		1.69412							0.48		2.24
0.702439		2.112							0.48		4.96
1.44		1.92							1.12		4.96
0.847059		2.18182							0.64		1.92
0.993103		1.41176							0.8		2.56
0.984615		1.96923							1.28		3.04
1.14286		1.85263							0.48		4.64
0.745631		1.58242							0.96		2.88
0.711111		1.46823							1.28		2.08
0.8		1.77231							1.44		14.56
1.06667		2.18							1.12		2.72
0.93913		2.00597							0.8		8.48
0.5376		1.71429							1.76		2.24
0.738462		1.57612							1.12		1.92
1.00571		1.66154							0.64		8.32
0.705882		2.32421							0.64		3.2
0.8		1.4069							0.64		1.76
1.06667		1.8							0.64		2.72
1.06667		2.18182							1.76		5.6
1.02857		1.93171							0.96		1.44
0.751304		1.51579							0.96		1.6
0.581818		1.81132							0.8		2.88
0.778378		1.37143							1.44		3.84
1.30909		1.92							0.96		2.24
1.08679		2.05714							0.96		2.72
0.738462		2.13333							1.28		2.72
0.533333		1.37143							1.28		3.52
1.28		1.96626							1.6		1.92
0.698182		2.05714							1.76		5.6
0.774194		1.65333							1.12		1.6
0.9		2.13333							1.44
0.548571									1.28
0.948148									0.64
1.04348									1.12
1.44									0.8
1.04348									0.8
0.872727									0.64
0.847059									1.28
0.662069									4
1.10769									3.52
1.024									2.56
0.881633									0.48
1.47692									0.48
1.06667									0.64
1.28									0.48
0.685714									1.28
0.872727									1.44
0.872727									0.64
1.2973									0.96
0.64									2.4
1.06667									1.6
1.03385									2.56
1.06667									0.96
1.12208									1.6
0.6									2.08
0.872727									1.28
1.44657									1.92
0.145455									1.6
1.09091									0.96
0.778378									1.92
0.834783									0.64
1.02524									1.12
0.662069									2.08
0.96									1.28
1.152									1.12
0.90566									0.8
0.96									1.44
0.669767									0.48
1.024									1.28
0.64									0.96
1.02857									1.6
0.96									0.8
0.979592									1.44
0.8									1.6
0.872727									2.4
0.772414									0.48
0.853333									1.28
0.6									1.44
0.8									1.28
1.01818
1.32414
Figure 6J - Microtubule growth velocity (µm/min) as a function of Klp9 concentration
	ATP				AMP-PNP
	10 µm tubulin		20 µm tubulin		10 µm tubulin		20 µm tubulin
Klp9 concentration (nM)	Mean	SD	Mean	SD	Mean	SD	Mean	SD
0	0.9852	0.2692	3.21	0.5331	1.03	0.2049	3.101	0.4858
10	1.341	0.3392	2.829	0.6523
25	1.677	0.3751	2.683	0.5881
100	1.641	0.3638	2.347	0.52	1.04	0.2324	3.062	0.4635
250	1.553	0.3433	2.366	0.5653	1.076	0.2312	3.094	0.3844
4.36364	2.85405	2.83944
3.53684	3.11489	2.86154
3.55556	4.2	2.82857
2.56	3.11351	3.11351
3.8784	2.90909	2.61818
3.34382	2.80292	3.2
3.2	3.38182	2.63529
3.63243	3.2	3.07924
3.18106	3.92727	2.74286
4.48	3.49091
3.30323	2.4338
3.53684	3.36
	3.2
	4.26667
2.70769			2.47742	2.3579
4.04211			2.32547	3.08571
4.2			3.33333	3.47429
3.31636			3.12558	2.75644
3.33913			2.44181	3.27805
2.90642			2.44138	1.72308
2.68235			3.03158	2.4
2.74286			2.7	2.625
2.90595			3.24156	2.74286
3.52405
2.61818			2.4	2.67907
2.9952			2.00727	3.6
3.68			3.33913	3.35705
3.16484			2.48528	3.15616
2.05049			2.61818	1.93684
3.31034			2.0129	2.432
4.11429			2.06769	2.66432
3.73333			2.688	2.80976
2.35472			2.71145	2.71304
3.09152			1.66956	3.6
4			2.30886	2.37037
3.6			2.47742	2.46857
3.23368			2.59765	3.24507
2.9			2.74286	2.61818
3.36			2.30769	3.2
3.6766			1.98621	2.74286
3.64557			2.85	3.2
3.10154			2.36066	2.77333
2.26286			2.44898	3.2
3.01177			2.58461	2.72842
3.97241			2.53793	2.59048
3.06667			2.9	2.02105
3.15616			2.01429	2.75862
2.95385			3.2	2.05714
2.65532			2.79494	2.05714
3.84			2.4	2.7
2.64828			2.02105	2.92174
3.07692			2.6427	2.60571
3.36			3.05455	2.66667
2.72727			2.16216	2.80976
3.73333			2.66667	3.24812
3.86866			2.91518	2
3.3			2.55135	2.74286
3.10588			2.27368	1.5
2.82353			2.53793	2.0093
3.87097			2.58461	3.64444
2.58653			2.4	2.67541
3.9619			2.5	2.91892
2.8718			2.02449	2.50667
3.41695			2.07568	2.53585
3.072			2.60571	2.304
2.84444			3.08966	2.4338
2.43582			2.72727	2.69752
3.33913			3.00895	2.48471
2.90642			1.92	2.62295
3.13469			2.8701	2.20127
2.7759			2.5165	2.12459
3.2			3.03797	3.07692
3.3931			3.40645	2.3301
3.03674			2.50141	3.28421
2.86567			2.45581	3.06667
3.04			2.48889	2.48675
2.96907			1.66956	3.01936
3.09333			2.25306	2.34146
			2.66667	3.12727
			2.61818	2.92766
			2.46857	2.25882
			2.31111	3.09152
			2.82699	2.6
			2.48889	2.95385
			2.42759	2.16126
			1.44	3.05455
			2.4	2.90909
			2.29091	2.71304
			1.96204	2.71515
			2.5	2.79452
			3.2	1.84615
			1.64571	2.67541
			2.1	3.31268
			2.432	2.43038
			2.89811	3.0439
			2.45581	3.17217
			3.16235	2.53483
			2.99355	2.80449
			2.41832	2.36522
			3.08966
			2.59765
			1.92
			1.82069
3.06383		2.66667
3.11111		2.80976
3.58681		3.71613
4.30345		4.21463
3.52941		1.92
3.6		2.92174
2.7		3.06
3.2		3.27033
3.456		2.98667
2.76164		3.43486
2.76		3.63243
3.03158		2.67811
3.07692		2.85957
3.2		2.96727
2.4189		2.54458
3.28421		3.46667
3.21448		3.07389
3.50118		2.048
4.11429		2.71304
2.71698		3.36623
3.46667		3.024
3.17322		2.9313
2.55413		2.85
2.90909		2.352
2.82353		3.35094
3.71321		3.14182
3.81244		1.25217
4.45714		3.43358
2.94653		2.79685
2.4		3.34679
3.27151		3.94521
3.47234		1.728
2.92683		2.44528
4.26667		3.1
2.66667		2.13333
2.96136		2.4
2.77113		2.16338
4.36364		3.2
3.91837		3.1745
3.88571		2.65263
3.80198		2.77113
3.54461		3.03158
3.41818		3.32948
2.87103		2.98378
3.35238		2.64828
3.2		3.36842
2.82353		2.51707
3.6864		4.12903
3.2		3.2
2.79273		2.95385
3.63109		2.84246
3.38823		2.45581
2.14925		2.75088
2.89811		3.30756
3.15429		2.69474
3.46839		2.85405
3.34118		3.02022
2.7871		3.88861
3.2		3.39692
		2.24112
		3.47429
		2.87425
2.70769			2.47742	2.3579
4.04211			2.32547	3.08571
4.2			3.33333	3.47429
3.31636			3.12558	2.75644
3.33913			2.44181	3.27805
2.90642			2.44138	1.72308
2.68235			3.03158	2.4
2.74286			2.7	2.625
2.90595			3.24156	2.74286
3.52405			2.688	1.30909
3.43486			3.10376	1.51579
2.70769			1.7	1.87013
3.95294			2.93878	1.37143
2.91556			1.84615	2.00727
2.97143			2.62564	3.17538
2.60741			3.01017	1.93939
2.42424			2.10989	2.752
2.93503			1.6	2.92174
3.66102			1.93762	1.47692
2.90526			3.00895	2.4
3.84			2.4233	3.5
2.53585			2.25882	2.60571
2.2125			2.4381	1.536
2.8			3.53684	3.04762
2.25103			3.38823	1.85807
2.44364			2.74286	1.92
2.57455			3.28767	1.33333
3.2			2.36191	2.4
3.2			2.60741	2.53333
3.56814			2.22439	2.52632
2.83636			1.98621	2.92174
3.42857			2.93503	2.88
3.59358			2.48471	2.93333
2.37176			2.65846	1.92
2.65532			2.9952	2.86667
3			2.4	2.48276
2.91646			3.06383	2.31724
3.69231			2.05714	1.06667
2.97465			2.46154	2.88
3.39512			2.69268	2.31724
3.2			3.2	2.4
3.33521			2.72	2.08696
3.29771			1.92	2.66024
2.64828			2.79612	3.10588
2.8			2.75862	2.4
3			2.96471	2.4338
			3	2.73103
			2.32727	2.92174
			3.10154	3.01177
			2.29565	2.92881
			1.94595	2.66667
			2.83826	2.4
			2.02105	2.4
			2.78364	2.44211
			3.42857	2.88
			3.84	1.56279
			2.36883	3.05455
			2.85405	2.8562
			2.18182	2.65105
			1.37143	1.69412
			1.856	1.92
				2.74286
				2.32258
				3.21951
				2.13333
				2.13333
				2.688
				2.4
				1.82857
				2.52632
				2.65412
				3.3369
				2.82353
				2.56
				1.98095
				2.46857
				3.6
				2.13333
				2.74286
				3.0439
				2.13333
				2.65143
				3.05455
				2.65846
				2.13333
				1.51579
				2.57561
				2.98378
				2.26909
				2.44832
				2.61818
				2.18
				2.30769
				3.11351
				2.25133
				2.88
				2.22921
				2.29859
				2.90341
4.36364	2.85405	2.83944
3.53684	3.11489	2.86154
3.55556	4.2	2.82857
2.56	3.11351	3.11351
3.8784	2.90909	2.61818
3.34382	2.80292	3.2
3.2	3.38182	2.63529
3.63243	3.2	3.07924
3.18106	3.92727	2.74286
4.48	3.49091	3.05455
3.30323	2.4338	2.21538
3.53684	3.36	2.27556
3.21322	3.2	2.02105
2.52632	4.26667	2.4
2.29565	2.33684	3.70909
3.38286	3.0439	2.74286
3.51141	2.90909	3.28421
3.05753	3.6	2.85714
2.71414	2.28571	3.2
3.5	2.78473	2.89933
3.89189	2.80976	3.3
2.96812	2.59048	3.6
3.23787	2.60571	3.33734
3.98491	2.2	3.072
3.73333	3.39248	3.12289
3.23168	4.2	3.05455
3.78947	2.13333	2.87143
3.6812	3.13469	3.38823
3.08571	2.16585	1.42703
3.2	1.92	2.59459
2.21538	3.44615	3.30667
2.23256	3.03158	2.51803
3.56571	3.08148	3.31034
3.01017	1.92	2.81446
3.46988	2.8	2.86316
3.49091	3.2	2.07568
3.15676	3.26809	3.36623
2.63226	3.2	3.02022
2.93953	3.01177	2.48889
4.224	2.60571	2.64828
3.91111	2.51429	2.95385
3.37171	3.2	2.48889
3.77705	2.4	3.11795
3.456	3.47234	2.93878
3.88571	1.70667	2.64828
3.38823	3.62264	2.22439
3.7434	3.6	2.82353
4.26667	2.94545	3.02022
2.95385	3.61412	3.26038
2.944	3.76083	3.39512
3.27805	3.24281	3
3.24	2.88781	2.88
3.07924	3.37297	2.26415
3.73333	2.50435	2.65714
3.10303	2.944	2.31429
4.8	2.14468	2.86667
2.80755	3.76	4.06154
3.584	2.47467	3.6
2.96727	2.7871	3.25424
2.74286	2.93333	2.7013
2.74286	1.78605	3.37297
3.72537	3.74634	2.64594
3.49091	2.13333	2.51803
4.26667	1.92	3.13043
3.8054	2.51077	2.64348
3.15	2.53091
4.01194	3.33913	3.9619
3.25356	2.75644	2.74286
3.456	3.42857	3.85882
3.66102	3.456	2.35886
3.72706	3.24604	3.33913
3.74505	2.18947	1.9027
3.24	2.95385	3.64138
3.95294	3.2	2.5985
2.63593	2.64	2.496
3.5223	3.8069	3.32308
3.98769	2.112	2.74286
	3.12	3.00895
	3
	3.47919
	2.61818
	2.84444
	2.4809
	3.71613
	3.78182
	2.96727
	2.99316
	3.46047
	2.89609
	3.37021
	3.06383
	1.92
	2.1
	2.88
	2.76364
	2.26517
	2.20952
	2.52632
	2.4
	2.14588
	2.25882
	2.74286
	3.59111
	3.13191
	3.7012
	2.688
	3.16145
	2.32088
	2.24681
	3.91111
	3.49906
