# Supplementary material for: Kinesin-6 Klp9 orchestrates spindle elongation by regulating microtubule sliding and growth
Source: eLife. 2021 Jun 3;10:e67489. doi: 10.7554/eLife.67489 (PMC8205488; doi:10.7554/eLife.67489)
Supplement: Figure 6—source data 2. [file elife-67489-fig6-data2.xlsx]

## Sheet: Figure S6
Figure 6 - figure supplement 2 - Microtubule length at 20 µm tubulin									Figure 6 - figure supplement 3 - Catastrophe frequency (min-1)
klp9 concentration (nM):	0	10	25	100	250			klp9 concentration (nM):	0	10	25	100	250
Microtubule length (µm):	13.28	16.16	12.16	8.96	6.08			catastrophe frequency (min-1):	0.240964	0.257511	0.376176	0.216606	0.483871
	2.88	10.4	7.52	4.48	3.2				0.27027	0.625	0.285714	0.226415	0.594059
	16.48	9.6	10.08	8.96	1.92				0.79646	0.29703	0.898876	0.428571	0.727273
	10.56	10.72	6.24	3.68	10.4				1.875	0.307692	0.659341	0.314136	0.489796
	3.52	10.24	4.32	12.32	2.72				0.96	0.285714	0.242915	0.794702	0.612245
	7.52	12.16	2.4	3.68	2.88				0.779221	0.20202	0.204082	0.882353	0.552995
	20.64	4.32	3.36	6.24	6.56				0.734694	0.425532	0.456274	0.759494	0.574163
	3.68	28	11.2	6.4	8				0.229008	0.271493	0.222222	0.41958	0.885609
	10.08	9.28	5.28	4.48	10.72				0.289855	0.382166	0.275229	0.430108	0.200669
	8.96	12.16	3.04	4.32	2.72				0.625	0.508475	0.810811	1.30435	0.458015
	8.64	10.56	7.68	1.12	1.28				1.71429	0.714286	0.458015	1.09589	0.631579
	16.32	4.8	21.92	7.36	8.48				0.211268	0.772532	0.97561	0.348837	0.27907
	13.92	6.4	8.64	2.72	5.76				0.48	0.266667	1.28333	0.201342	0.230769
	12.64	2.08	11.36	2.88	2.72				0.27027	0.21978	0.621762	0.359281	0.320856
	17.92	2.4	16.8	1.28	3.84				0.638298	0.428571	0.212014	0.331731	0.652174
	5.28	4	7.04	6.72	3.84				0.662983	0.242915	0.241935	0.333333	0.495868
	2.72	5.28	6.56	7.04	4.48				0.25974	0.481928	0.204082	0.269058	0.271493
	34.4	3.2	6.08	4.8	1.12				0.46332	0.216606	0.697674	1.39535	0.481928
	3.2	20	3.2	4	1.92				0.521739	0.372671	0.466926	0.454545	0.212766
	4.32	8.48	3.36	1.92	3.2				0.697674	0.40404	0.212014	0.421053	0.342857
	46.4	15.04	2.72	2.4	8.16				0.526316	0.495868	0.612245	0.247934	0.220588
	3.36	11.2	3.52	2.56	6.56				0.257511	0.43956	0.382166	0.253165	0.267857
	8.64	16.8	3.52	3.52	4.64				1.25655	0.221402	1.79104	0.519481	0.314136
	12.32	11.36	7.04		1.28				0.591133	0.566038	1.09091	0.230769	0.201342
	13.92	23.68	3.68	13.12	4				0.402685	0.214286	0.434783	0.449438	0.508475
	14.56	11.68	3.04	12.8	4.8				0.447761	1.03448	0.515021	0.56338	0.209059
	13.76	2.88	1.76	7.84	6.08				0.692308	0.23166	0.821918	0.276498	0.265487
	6.88	6.4	5.28	7.52	8.32				0.528634	0.348837	0.869565	0.25641	0.405405
	6.56	6.56	5.76	6.24	7.52				0.215827	0.201342	1.15385	2.6087	0.461538
	12.8	8.96	4.16	6.08	2.88				0.287081	0.315789	0.656934	0.655738	0.615385
	3.2	10.56	9.6	7.36	7.68				0.495868	0.421053	0.571429	0.288462	0.833333
	5.6	3.52	9.76	9.92	10.72				0.229885	0.456274	0.555556	0.701754	0.3
	12.48	5.12	3.84	4	1.92				0.512821	0.618557	0.444444	0.472441	0.220588
	15.36	3.68	7.2	1.6	5.92				1.16883	0.746888	0.45283	0.422535	0.528634
	20.48	3.68	14.08	12.64	7.68				0.215827	0.5	0.640569	1.03448	0.291262
	14	3.36	4.96	4	2.4				0.365854	1.01695	0.689655	0.202703	0.461538
	12.8	6.08	12	3.68	7.68				0.210526	0.952381	0.418118	0.204778	0.265487
	10.4	6.24	9.28	3.04	3.2				0.550459	1.35338	0.255319	0.431655	0.5
	9.12	4.32	4.8	6.08	5.12				0.662983	0.449438	0.442804	0.481928	0.947368
	8.32	2.24	7.2	10.88	6.4				0.309278	1.22449	0.705882	0.337079	0.226415
	8.48	7.2	7.68	1.6	6.56				2.72727	0.56338	0.786026	1.2766	0.555556
	9.28	5.6	10.88	1.76	6.24				1.25	0.478088	0.229885	0.23622	0.255319
	13.6	17.44	2.72	4.64	2.08				0.27027	0.402685	0.433213	0.46332	1.12149
	9.6	11.2	2.56	9.12	9.12				0.618557	0.487805	0.424028	0.079722	0.422535
	9.28	8.8	13.12	4.16	3.2				0.491803	0.772532	1.14286	0.258621	0.674157
	14.4	6.4	3.04	4.48	3.04				0.478088	0.957447	0.232558	0.606061	0.740741
	16.96	13.76	4.8	4	4.64				0.597015	0.458015	0.687023	0.232558	0.947368
	6.72	4.32	1.76	5.92	3.84				0.234375	0.991736	0.215827	0.625	0.594059
	1.92	11.36	4.8	5.76	3.52				0.687023	0.687023	0.794702	0.408163	0.597015
	2.08	5.44	8.8	17.12	10.4				0.285714	0.72	0.38961	0.689655	0.517241
	10.08	3.84	3.04	4	8.64				1.15385	0.224719	0.857143	0.32967	0.923077
	14.72	15.36	2.56	13.12	6.4				0.227273	0.200669	0.722892	0.944882	0.472441
	11.04	9.6	5.92	2.88	10.56				0.827586	0.243902	0.666667	0.21978	0.240964
	9.6	4.64	2.56	3.68	7.84				0.206897	0.775862	0.456274	0.451128	0.200669
	13.44	6.24	6.72		1.12				0.857143	0.280374	0.465116	0.262009	0.421053
	12.8	3.36	17.12	3.84	4.32				0.206186	0.410959	0.267857	0.603015	0.542986
	11.84	7.52	0.96	3.84	3.84				0.238095	0.57971	0.689655	0.37037	2.19512
	9.28	8.64	2.56	0.96	5.92				0.437956	0.711462	0.223881	2.23333	0.571429
	8.16	4.8	3.52	0.64	4.32				0.674157	0.519481	0.424028	0.705882	0.466926
	6.24	2.56	3.52	6.72	2.4				0.545455	0.280374	0.474934	0.631579	0.48583
	10.88	5.6	2.56	3.04	4.64				0.255319	0.538117	0.645161	1.29444	0.685714
	1.92	5.12	2.56	14.24	1.28				0.204778	0.789474	0.435835	1.17073	0.689655
	1.76	3.84	13.12	5.44	5.92				0.458015	0.697674	0.451128	0.631579	0.765957
	7.68	4	4.96	3.84	13.6				0.451128	0.55814	1.2	1.03448	0.933852
	4	17.6	3.84	6.08	3.2				0.348837	0.545455	0.422535	1.25	1.09091
	5.6	11.04	4.64	3.52	3.84				0.582524	0.228137	1.11111	0.634921	0.740741
	4	2.4	4.96	12.32	15.52				0.446097	0.697674	0.530973	0.208333	0.666667
	4.8	5.12	9.28	12.32					0.226415	0.335196	0.612245	0.597015	1.39535
	8.48	3.68	3.04	10.08	6.08				1.9	0.994475	0.478088	0.319149	0.218182
	6.88	6.88	5.92	6.72	9.6				0.23622	0.560748	0.228137	0.932642	0.640569
	4.32	15.36	5.12	3.2	8.32				0.57971	0.542986	0.222222	1.08108	0.436364
	8	16.48	2.08	14.08	8.16				0.368098	0.461538	0.972973	0.264317	1.35135
	5.6	9.44	9.28	11.2	3.36				0.269058	1.0084	0.218182	0.212014	0.352941
	9.12	3.52	4.8	7.84	5.12				0.243902	0.211268	0.436364	0.327869	0.252101
	7.04	3.04	7.2	4	3.52				0.433213	0.481928	0.3	0.246914	1.59292
	15.68	7.52	3.04	2.08	2.4				0.28436	0.240964	0.458015	1.21212	0.782609
	12.8	3.2	2.56	7.04	9.12				0.574163	0.661765	0.46875	0.233463	1.66667
	5.28	2.88	15.52	4.8	0				0.226415		0.3	0.56872	0.310881
	2.72	7.68	5.12	5.12	3.84				0.228137		0.224719	0.574163	0.898876
	4	4.16	8.16	4	2.88				0.465116		0.652174	0.238095	0.725806
	7.84	5.6	5.28	3.52	2.56				0.638298		0.454545	0.603015	0.861244
	2.88	10.72	5.76	6.24	8.16				0.214286		0.659341	0.725806	0.20979
	2.88	2.08	2.24	36	6.4				0.234375		1.2	0.779221	0.224719
	4.8	9.6	8.8	12.32	1.28				0.201342		0.46875	0.962567	0.434783
	7.36	4.8	2.72	11.68	3.04				0.081111		0.472441	0.472441
	6.56	4.32	4.8	10.4	5.76				0.209059		0.239044	0.218182
	5.28	6.88	3.68	7.84	3.04				0.213523		0.789474
	10.08	2.4	5.6	3.04	3.36				0.5		0.206186
	12.64	7.68	6.08	4.16	2.88				0.441176		0.223881
	8	4	1.6	16.32	6.4				2.6087		0.065
	6.4	6.08	6.56	6.72	4.48				0.669145		0.233463
	4.48	3.2	4.32	15.04	6.24				0.909091		0.431655
	4.32	6.24	26.24	7.68	7.2				0.211268		0.335196
	7.04	15.68	13.12	8.48	13.92				0.212014		0.233463
		17.44	8.96	5.28	2.56				0.20979		0.504202
	7.68	3.2	4.32	10.72	3.2				1.01124		0.244898
	22.88	4	4.64	7.36	5.76				0.545455		0.772532
	5.92	2.08	9.76	7.84	4.8				1.07143		0.209059
	2.08	4.48	8.16	4	7.52				0.502092		0.220588
	2.4	8.16	2.08	4.8	0.96				0.666667
	1.92	5.44	6.08	8.8	3.2				0.20202
	2.72	6.24	17.44	8.32	3.2				0.540541
	3.84	11.2	12.8	5.44	4				0.20339
	7.2	7.04	8.48	2.72	7.36				1.21827
	3.04	8.16	1.44	11.2	6.24				0.495868
	12.64	2.08	10.72	7.68	7.2				0.251046
	4.32	2.08	7.68	4.96	22.4				0.431655
	3.36	3.04	19.2	5.12	3.68				0.430108
	2.4	2.4	13.6	7.84	8.32				0.20339
	6.56	3.52	5.12	3.2	5.92				0.294118
	2.56	5.12	2.88	1.12	3.2				0.456274
	1.76	5.44	3.52	8	1.12				0.363636
	13.28	10.4	12	4	7.2				0.674157
	2.4	8.48	7.36	3.04	4.48				0.55814
	4.32	16.16	3.2	6.4	0.8				0.227273
	19.68	12	8.96	2.88	1.12				0.810811
	10.4	12.32	7.52	4.8	5.12				0.272727
	10.56	3.84	2.72	1.28	3.2				0.97561
	3.52	3.84	3.04	2.72	1.92				0.234375
	5.76	5.6	4.64	6.08	8.32				0.309278
	3.2	8.64	6.08	2.88	6.56				0.882353
	12	9.6	6.4	3.36	2.4				0.214286
	6.56	8.64	2.56	0.8	16.8				0.6
	6.08	9.12	1.76	5.44	7.52				0.272727
	0.96	20.48	17.12	4	2.72				0.957447
	1.92	10.08	11.68	3.36	11.36				0.227273
	20	6.4	10.72	2.56	1.44				0.246914
	10.88	3.36	6.24	3.2	5.12				1
	6.4	3.2	5.28	3.36	7.52				1.01695
	8.16	5.12	7.84	2.08	2.88				0.392157
	11.68	8	2.4	5.92	1.76				0.470588
	2.4	5.44	4.48	5.6	4				1.55556
	5.28	5.44	5.28	9.76	1.92				0.654545
	2.08	4.64	8.8	12.48	2.4				1.03004
	2.72	8.16	14.4	17.44	3.2				0.524017
	4.32	4.8	8.32	5.6	4.64				0.294118
	5.6	2.88	2.08	5.6	2.24				0.727273
	2.88	3.2	3.84	6.56	2.88				0.271493
	4.96	4.48	12.64	7.36	3.04				0.772532
	8.64	4.64	4.16	0.8	6.08				0.218182
	9.28	2.88	12.64	4.64	3.04				0.84507
	3.68	2.88	4	3.84	1.76				0.857143
	2.56	6.08	7.52	2.72	4.96				0.253165
	8	9.6	3.68	14.56	1.76				0.29703
	8.8	9.6	4.48	6.08	5.6				0.437956
	6.4	7.2	7.52	13.76	13.92				0.731707
	16.48	4	0.8	6.88	11.36				0.25641
	10.88	6.08	16.48	7.2	17.12				0.20339
	9.76	6.4	12.48	4	12.32				0.309278
	14.56	7.52	5.6	4.16	11.04				1.25
	16.48	13.6	3.84	9.28	19.84				0.519481
	16.48	6.24	3.84	4.8	19.68				0.228137
	6.24	8.96	5.76	1.92	20.32				0.528634
	6.4	5.28	5.44	14.24	5.12				0.27027
	18.56	2.72	15.04	13.92	2.56				0.418118
	10.4	1.44	14.56	8.16	3.84				0.229008
	2.88	2.56	12.8	2.24	0.64				0.947368
	12	7.36	12.64	7.68	0.96				0.387097
	19.52	6.88	5.6	8.16	2.4				0.510638
	20.48	6.88	6.24	3.04	8.32				0.666667
	17.76	5.44	7.68	3.68	11.36
	0	2.24	2.4	5.92	5.12
	13.44	4.8	8.16	7.04	8
	15.04	10.56	17.44	14.72	3.2
	9.28	8.48	5.44	5.44	2.08
	7.84	6.88	2.24	1.92	11.04
	4.8	16.16	13.6	5.6	3.36
	10.08	7.36	16.96	4.32	4.16
	7.36	5.12	10.4	1.6	2.56
	12.8	1.28	2.4	8.48	1.76
	9.92	13.6	2.88	13.6	4.8
	0.96	8.16	3.68	2.88	4.8
	1.28	2.88	10.56	1.92	3.2
	2.08	2.4	10.4	4.96	1.12
	3.36	6.4	3.36	2.88	0.8
	6.08		2.72	5.28	3.68
	8.64		9.28	7.36	0
	3.84		0	10.72	3.2
	15.04		20.96	1.6	6.72
	5.44		9.44	8.64	2.4
	20.16		8.96		4.64
	12.96		11.84		4.64
	13.28		0		4.32
	16		3.36		14.4
	4.32		13.12		6.88
	5.12		6.72		11.84
	2.88		7.2		12.16
	11.68		4.96		13.6
	10.88		3.52
	5.76		16.16
	12.96		5.12
	4		4.48
	4.16		21.76
	15.36		2.56
	13.76		7
	5.6		14.72
	19.36		8.16
	10.24		14.72
	10.08		5.92
	15.04		10.08
	20.32		8
	14.08		1.92
	13.92		4
	9.28		7.36
	3.84		7.2
	1.92		5.12
	9.76		2.72
	3.68		10.56
	4.8		12
	15.04		8.32
	16.96		19.36
	16.64		9.76
	8.8		4.32
	22.56		9.28
	24.64		5.6
	13.28		4.16
	13.76		10.88
	8.32		7.04
	4.96		8.16
	7.2
	7.84
	2.4
	13.44
	5.76
	7.52
	9.76
	7.04
	8.96
	8.32
	6.88
	1.92
	5.44
	7.04
	2.08
	3.84
	13.28
	10.72
	7.2
	4.64
	2.08
	4.32
	9.28
	5.92
	9.92
	2.56
	10.08
	6.56
	4
	7.04
	12.8
	3.04
	12
	16.32
	14.88
	2.72
	4.16
	2.4
	3.36
	4.96
	9.12
	12.16
	15.36
	1.6
	1.6
	5.6
	4.48
	4.16
	5.92
	6.24
	6.08
	4.32
	1.76
	3.68
	0
	3.68
	3.68
	3.84
	4.16
	7.04
	5.76
	2.56
	12.64
	12.48
	10.4
	4.8
	2.08
	12.64
	5.76
	1.6
	14.24
	5.92
	14.4
	2.88
	10.88
	4.32
	9.76
	6.72
	7.36
	17.76
	9.92
	21.6
	9.12
	14.56
	3.52
	5.76
	7.52
	7.68
	15.04
	6.4
	7.68
	3.2
	9.92
	9.6
	4
	13.6
	19.52
	5.12
	2.4
	2.88
	3.84
	18.72
	12.8
	7.36
	5.92
