# Supplementary material for: Kinesin-6 Klp9 orchestrates spindle elongation by regulating microtubule sliding and growth
Source: eLife. 2021 Jun 3;10:e67489. doi: 10.7554/eLife.67489 (PMC8205488; doi:10.7554/eLife.67489)
Supplement: Figure 7—figure supplement 1—source data 1. [file elife-67489-fig7-figsupp1-data1.xlsx]

## Sheet: Figure S7
Figure 7 - figure supplement 1 - Metaphase spindle length (µm) as a function of cell length (µm) in wild-type, dis1Δ and klp9Δ cells
wt						klp9Δ						dis1Δ
no HU		HU-treated				no HU		HU-treated				no HU		HU-treated
Cell length (µm)	Metaphase spindle length (µm)	Cell length (µm)	Metaphase spindle length (µm)			Cell length (µm)	Metaphase spindle length (µm)	Cell length (µm)	Metaphase spindle length (µm)			Cell length (µm)	Metaphase spindle length (µm)	Cell length (µm)	Metaphase spindle length (µm)
14.3822	2.36237	19.3494	3.69389			14.3822	2.36237	19.3494	3.69389			13.9714	4.26933	26.8971	5.63645
13.7209	2.66293	23.9402	3.29848			13.7209	2.66293	23.9402	3.29848			15.3808	4.01278	26.3102	4.66476
15.0638	3.57771	15.0451	3.23975			15.0638	3.57771	15.0451	3.23975			14.9169	3.68348	24.4988	4.89767
14.7565	3.68348	19.1787	3.73524			14.7565	3.68348	19.1787	3.73524			16.6131	3.68348	21.5389	4.84248
15.6588	2.86217	20.9673	3.00613			15.6588	2.86217	20.9673	3.00613			15.6481	3.40165	23.1337	4.98317
16.2949	2.98905	18.1033	3.49445			16.2949	2.98905	18.1033	3.49445			15.7971	3.42041	27.3619	4.4138
14.8895	2.88444	23.0811	3.2358			14.8895	2.88444	23.0811	3.2358			15.0986	3.80316	27.9346	3.84
13.7637	3.1435	15.52	3.46133			13.7637	3.1435	15.52	3.46133			15.9976	4.55087	26.2053	4.34658
15.5357	2.89772	23.8314	3.1435			15.5357	2.89772	23.8314	3.1435			16.1909	3.59555	23.0144	4.35247
14.2031	2.73408	22.4462	3.79305			14.2031	2.73408	22.4462	3.79305			16.2106	3.95818	23.116	4.8
16.576	2.79886	18.633	3.10664			16.576	2.79886	18.633	3.10664			14.6476	3.0568	28.756	4.04772
14.6232	3.0568	21.7906	3.59555			14.6232	3.0568	21.7906	3.59555			15.2202	3.71117	17.7802	4.26033
16.6431	3.07766	21.3976	4.01278			16.6431	3.07766	21.3976	4.01278			15.2681	3.28293	27.9428	4.54805
14.5942	2.7247	20.7236	4.43694			14.5942	2.7247	20.7236	4.43694			16.4683	3.51272	23.1868	4.9419
14.8809	3.10664	17.4407	3.92245			14.8809	3.10664	17.4407	3.92245			17.6262	4.37008	26.4329	5.37848
14.8481	2.98905	22.5146	3.17591			14.8481	2.98905	22.5146	3.17591			20.3276	4.64	33.2511	4.19981
12.2659	2.29085	23.5765	3.64856			12.2659	2.29085	23.5765	3.64856			14.2625	3.2	19.8922	3.76595
14.5942	2.60461	17.28	3.42041			14.5942	2.60461	17.28	3.42041			16.7275	3.54175	25.0342	5.93943
15.7565	2.98905	18.2849	3.65557			15.7565	2.98905	18.2849	3.65557			15.2538	3.0735	22.8582	4
14.2481	2.79886	19.8922	3.36381			14.2481	2.79886	19.8922	3.36381			17.429	2.98905	24.3537	4.45708
14.9075	2.79428	19.212	3.85331			14.9075	2.79428	19.212	3.85331			14.8972	4.87672	36.1508	4.30813
14.9452	2.63879	26.0068	3.18798			14.9452	2.63879	26.0068	3.18798			15.8174	4.42538	27.0722	4.66476
13.661	2.6242	22.8262	3.26337			13.661	2.6242	22.8262	3.26337			15.8327	3.42041	29.96	3.80316
16.5242	2.57992	21.6893	3.15569			16.5242	2.57992	21.6893	3.15569			15.7785	3.8166	27.4683	4.15384
15.6808	2.32964	20.91	3.87319			15.6808	2.32964	20.91	3.87319			15.284	3.40165	31.7204	5.5541
14.3108	2.6242	23.0228	4.65102			14.3108	2.6242	22.3158	4.15384			16.3615	3.29848	28.7154	4.19981
16.6469	3.26337	27.8791	3.49445			16.6469	3.26337	20.1828	3.32938			13.7125	2.83521	25.4757	4.83719
15.6391	2.7247	18.8243	3.64856			15.6391	2.7247	19.5344	3.39034			14.2714	3.2946	26.0387	4.77326
15.4008	3.42415	28.3485	4.25131			15.6808	3.07766	22.833	3.29848			16	3.57771	23.8013	4.86621
14.0836	2.91973	22.4091	3.80316			16.65	2.75274	16.9585	3.84666			14.874	3.21596	24.9528	4.65102
15.8408	3.49445	23.1121	4.40218			18.0913	3.51272	24.1409	3.87319			16.7992	3.62745	27.4053	4.29325
15.7452	3.1435	24.8742	4.20894			14.9589	2.95025	21.1569	4.01278			15.1756	3.16784	19.2546	5.00879
15.746	3.52363	30.3385	3.62039			16.3169	3.36381	23.2551	4.22715			16.4177	3.17591	29.5394	4.80267
15.6391	3.3409	24.4884	3.74892			16.8419	3.28293	25.6285	4.93931			16.4084	3.29848	28.0963	6.18023
14.2858	2.86217	22.3227	3.40165			16.4994	3.0568	26.871	4.33184			15.5274	3.0568	30.9264	4.43694
16.6007	2.75274	19.1392	2.73408			15.0272	3.42041	25.3876	4.70846			17.334	3.15163	22.2486	4.75176
13.9347	2.97617	23.1691	3.93548			16.8175	3.50907	20.3879	4.22412			16.7443	3.10664	19.3282	5.15984
16.1671	3.00613	28.2204	3.62745			18.5524	3.2	16.876	3.85331			17.6624	2.98905	20.0045	5.1524
14.8972	3.0735	23.2088	3.03579			15.8327	3.7455	24.0021	4.22412			18.1168	2.95025	23.4982	4.98317
15.4795	2.84872	27.6022	3.97432			16.742	3.04	17.8928	3.28293			16.9871	4.19981	24.2636	4.54805
15.0995	2.98905	20.0403	4.74906			14.7755	3.42415	25.7645	4.01278			16.3748	2.49928	29.0465	5.44235
14.8188	2.84872	26.299	3.95171			16.3427	3.04	22.783	4.64			18.3749	3.00613	20.938	5.5541
15.8876	2.88444	27.8823	3.84666			16.8965	2.83069	23.3622	4.30813			15.5628	3.89297	33.4813	4.17229
15.2664	2.64847	21.1642	3.39411			15.0995	2.73876	19.975	3.62745			15.8602	3.76595	27.0443	4.66476
15.2706	2.93721	21.7976	3.21994			16.5196	3.17591	28.8577	3.87319			18.5889	3.17591	24.6093	4.98317
14.4124	2.89772	33.963	4.23622			14.686	3.03579	35.8832	3.72151					20.6152	5.65685
16.3584	3.21596	32.3975	3.76595			14.9144	3.10664	22.9671	3.74892					23.2397	4.89767
15.7265	2.88444	26.9888	3.3752			15.2336	2.83069	28.5715	4.9419					34.134	6.02289
15.7785	3.07766	28.9958	4.36715			15.6187	3.01887	23.8995	4.48286					20.8154	4.98317
15.6579	3.15163	38.7362	5.12			14.4399	2.79428	24.4423	4.65927					17.8125	5.30177
14.9888	3.69389	33.9882	4.8			15.173	2.91973	27.9634	4.23622					27.7285	4.45708
16.9706	2.98905	20.8964	3.71117			17.0593	2.60461	27.3854	4.70574					26.4121	6.88744
15.2135	2.6242	23.1337	4.34658					22.0481	4.34658					29.2327	5.78218
16.5304	2.93721	29.1543	4.22715					31.5297	4.05088					26.7348	7.44301
14.9769	2.75274	26.9888	3.93548					23.6562	3.73181					18.1507	3.57771
16.0392	3.68	22.6285	3.73524					23.9177	4					22.7864	4.70846
		24.48	4.81331					25.9062	4.53114					23.8062	6.0568
		26.0466	5.36656					24.3521	4.66476					28.0662	5.05205
		34.78	4.66476					30.5968	4.23622					21.5193	3.39034
		23.5287	4.07922					28.1222	4.17229					24.3389	4.82394
		24.7979	3.79305					26.108	4.03822					28.7542	4.52548
		30.1569	5.02155					24.4402	4.54805					33.793	4.66476
		26.8819	4.97031					26.9717	4.07922					28.2054	5.44
		24.7147	5.24107					26.9105	4.60678					26.8047	4.5817
		27.5498	5.67493					27.7387	4.64					25.2334	4.77326
		28.2634	3.96141					22.9001	3.29848					20.6077	4.50564
		27.7705	4.26033					22.5373	4.39345					24.3521	3.59555
		24.7292	4.19981					27.2663						20.4781	4.67299
		23.3425	4.55368					23.6886	5.10247					25.642	4.52548
		30.0945	6.17608					26.0068	3.89625					28.9215	4.22412
		30.6416	4.35247					22.5231	4					20.3647	4.87409
		27.1439	4.68393					19.9821	4.43694					17.6036	3.69389
		23.6237	4.96258					24.551	4.92893					17.3066	4.22412
		21.2505	4.40218					26.599	4.29921					23.7588	3.92245
		27.5665	5.00112					26.505	4.34658					25.4646	4.11359
		29.9674	4.00959					22.1945	4.72745					25.9797	4.67299
		22.5094	5.263					24.4009	3.7455					22.8621	3.80316
		37.3678	5.76888					23.6638	3.2358					25.8359	3.89625
		15.424	4.17229					19.3626	4.03822					24.8516	4.15076
		22.801	5.5541					29.4091	4					22.637	4
		15.6808	2.37857					30.9365	4.12912					28.4894	4.88459
								26.985	4.30813					25.5745	3.36381
								28.3746	5.14245					29.7931	3.68348
								28.6306	4.01278					15.4464	4.0287
								17.7802	3.73181					21.8428	3.29848
								25.4118	4.15384					23.6524	3.95171
								20.635	4.01278					23.8743	3.80316
								22.3914	4.35247
								31.3163	5.7711
								23.2964	5.43529
								26.4847	4.36715
								22.7763	4.26033
								24.2953	3.59555
								16.2862	3.29848
								26.3961	4.35247
								21.9672	2.86217
								20.465	3.44651
								26.6471	5.24107
								23.4672	4.98317
								23.9733	4.32296
								22.1622	5.263
								20.3395	3.52
								24.0155	4.96
								24.9379	3.79305
								28.6096	3.3752
								26.1467	4.30813
								30.5701	3.69389
								20.7149	3.36
								23.602	3.57771
								25.8908	4.48286
								26.5475	4.61788
								22.2831	3.43535
								26.0176	3.74892
								25.3594	4.60678
								25.4682	4.93931
								26.9352	5.31865
								28.2911	3.60976
								37.2968	4.37008
