# Supplementary material for: Kinesin-6 Klp9 orchestrates spindle elongation by regulating microtubule sliding and growth
Source: eLife. 2021 Jun 3;10:e67489. doi: 10.7554/eLife.67489 (PMC8205488; doi:10.7554/eLife.67489)
Supplement: Figure 7—source data 1. [file elife-67489-fig7-data1.xlsx]

## Sheet: Figure 7
Figure 7A - Anaphase B spindle length (µm) as a function of cell length (µm) in wild-type, dis1Δ and klp9Δ cells
wt						klp9Δ						dis1Δ
no HU		HU-treated				no HU		HU-treated				no HU		HU-treated
Cell length (µm)	Anaphase spindle length (µm)	Cell length (µm)	Anaphase spindle length (µm)			Cell length (µm)	Anaphase spindle length (µm)	Cell length (µm)	Anaphase spindle length (µm)			Cell length (µm)	Anaphase spindle length (µm)	Cell length (µm)	Anaphase spindle length (µm)
15.0791	12.1875	23.0228	15.8795			13.0466	9.66833	19.3494	13.2711			15.6808	9.85787	31.7591	14.7533
15.9559	12.0092	27.8791	19.5863			14.4142	10.9337	23.9402	15.3121			16.02	10.9223	26.8971	16.9666
15.4008	12.5629	18.8243	13.8401			13.6113	10.2334	15.0451	11.2621			15.0884	10.4018	26.3102	12.6284
14.0836	12.349	28.3485	17.3711			14.3822	9.2964	19.1787	11.8647			16.4955	12.5603	24.4988	11.5787
15.8408	13.1198	22.4091	10.5573			13.7209	9.74325	20.9673	9.63342			13.9714	11.0259	21.5389	11.7862
15.7452	13.7132	23.1121	17.2921			15.0638	10.8414	18.1033	9.29996			15.3808	11.7678	23.1337	12.7049
15.746	12.4288	24.8742	18.4064			14.7565	9.77221	23.0811	13.7374			14.9169	10.2244	27.3619	12.0349
15.6391	12.546	30.3385	20.7075			15.6588	10.3261	15.52	13.1892			16.6131	12.9386	27.9346	12.5978
14.2858	12.1775	24.4884	18.1934			16.2949	12.0387	23.8314	12.5772			15.6481	9.74486	26.2053	13.1879
16.6007	13.6082	22.3227	17.2776			14.8895	13.6103	22.4462	13.6243			15.7971	12.563	23.0144	14.4546
13.9347	12.8229	19.1392	15.2948			13.7637	10.5974	18.633	11.0749			15.0986	11.4635	23.116	12.3063
16.1671	13.3291	23.1691	18.6021			15.5357	11.2236	21.7906	13.1572			15.9976	11.6623	28.756	13.0241
14.8972	11.651	28.2204	21.1455			14.2031	8.22621	21.3976	12.3601			16.1909	12.3821	17.7802	12.2101
15.4795	12.7954	23.2088	17.1929			16.576	9.28833	20.7236	13.5787			16.2106	10.7274	27.9428	13.1924
15.0995	12.2369	27.6022	22.2188			14.6232	9.67469	17.4407	13.4754			14.6476	10.2723	23.1868	12.3853
14.8188	11.8189	20.0403	16.2463			16.6431	11.387	22.5146	14.3209			15.2202	11.1317	26.4329	14.382
15.8876	12.4552	26.299	18.9122			14.5942	10.8991	23.5765	14.4818			15.2681	10.3674	33.2511	13.5205
15.2664	12.8217	27.8823	17.0944			14.8809	10.7722	17.28	12.0589			16.4683	11.2617	19.8922	9.58421
15.2706	12.3468	21.1642	15.7838			14.8481	11.3696	18.2849	14.7283			17.6262	11.5909	25.0342	10.9204
14.4124	12.0266	21.7976	15.5616			12.2659	10.9358	19.8922	13.6261			20.3276	14.5221	22.8582	7.7286
16.3584	12.1168	33.963	21.7433			14.5942	10.9717	19.212	14.2708			14.2625	10.8979	24.3537	10.1928
15.7265	12.1579	32.3975	19.5215			15.7565	12.0659	26.0068	12.6395			16.7275	10.8489	36.1508	14.8373
15.7785	13.8924	26.9888	19.117			14.2481	12.5172	22.8262	15.6145			15.2538	10.04	27.0722	9.98167
15.6579	13.9178	28.9958	23.5343			14.9075	10.529	21.6893	14.1563			17.429	13.0355	29.96	12.7843
14.9888	12.3186	38.7362	20.9669			14.9452	10.3222	20.91	15.2627			14.8972	11.4539	28.5236	12.6304
16.9706	12.4433	33.9882	21.1805			13.661	10.0274	25.4093	13.2136			15.8174	8.85987	20.938	14.2448
15.2135	13.2129	20.8964	15.1327			16.5242	10.3506	22.3158	11.3018			15.8327	9.66645	33.4813	14.5857
16.5304	13.9933	23.1337	16.6349			15.6808	12.3058	20.1828	13.0106			15.7785	11.1474	27.0443	13.9573
14.9769	12.5947	29.1543	18.1163			14.3108	9.77141	19.5344	11.175			15.284	10.8605	24.6093	11.4576
16.0392	13.7053	26.9888	18.6665			16.6469	10.9441	22.833	11.7264			16.3615	9.28851	20.6152	13.5424
		22.6285	20.0781			15.6391	9.80317	16.9585	10.2503			13.7125	10.546	23.2397	12.4626
		24.48	19.9902			16.7992	11.6193	24.1409	10.9293					34.134	14.635
		26.0466	20.0863			14.4974	11.0596	21.1569	13.2827					20.8154	12.6976
		34.78	23.228			17.2102	10.0824	23.2551	13.4322					17.8125	11.5426
		23.5287	17.7998			15.6808	11.2559	25.6285	15.746					27.7285	13.157
		24.7979	19.2935			16.65	10.5464	26.871	13.6143					26.4121	14.9954
		30.1569	22.6482			18.0913	10.595	25.3876	13.714					29.2327	14.1487
		26.8819	22.1864			14.9589	10.2125	20.3879	14.1953					26.7348	16.3907
		24.7147	19.5804			16.3169	11.0315	16.876	12.4322					18.1507	9.45775
		27.5498	18.991			16.8419	12.2539	24.0021	12.8441					22.7864	11.4643
		28.2634	16.2038			16.4994	10.9346	17.8928	11.4993					23.8062	12.4605
		27.7705	19.602			15.0272	11.1801	25.7645	15.3883					28.0662	13.4733
		24.7292	16.7752			16.8175	13.5011	22.783	15.6385					21.5193	10.248
		23.3425	20.1416			18.5524	12.0273	23.3622	14.3965					24.3389	13.4883
		30.0945	21.7817			15.8327	11.9899	19.975	11.7219					28.7542	12.1165
		30.6416	22.2076			16.742	8.95598	28.8577	16.256					33.793	14.5713
		27.1439	18.8384			14.7755	10.7029	35.8832	18.962					28.2054	14.7905
		23.6237	18.8852			13.7609	11.658	22.9671	14.5767					27.4683	12.9797
		21.2505	15.544			13.6685	9.40756	28.5715	14.0623					31.7204	15.3264
		27.5665	20.3468			15.2538	11.528	24.7644	14.4362					28.7154	14.5636
		29.9674	15.299			16.3427	12.0004	26.7085	14.7425					25.4757	14.1486
		22.5094	17.5205			16.8965	11.0629	28.964	12.8475					26.0387	14.9638
		37.3678	23.3702			15.0995	11.2498	28.0589	12.5631					23.8013	11.4342
		15.424	13.1836			16.5196	11.3363	29.86	15.6827					24.9528	9.60605
		22.801	17.6026			14.686	10.4749	31.0927	14.8479					27.4053	11.238
		24.6093	17.4118			14.9144	10.56	28.1368	14.9671					19.2546	11.1813
		31.435	17.3524			15.2336	9.7288	25.6604	13.3833					29.5394	14.7759
		30.2912	20.7885			15.6187	10.1027	24.9621	12.0472					28.0963	13.126
		33.1513	21.8927			14.4399	11.4523	30.6816	16.3716					30.9264	14.8596
		25.9821	23.664			15.173	12.0399	26.9352	17.1398					22.2486	14.6285
		26.1315	16.8221			17.0593	10.1224	26.8971	14.1001					19.3282	12.3529
		27.7705	19.0094					30.9731	16.3413					20.0045	10.9254
		25.609	17.5077					24.6306	13.6007					23.4982	14.0275
		30.1251	22.6022					24.1197	16.574					24.2636	13.0473
		30.3241	21.2079					26.0009	15.145					29.0465	15.1922
		31.2496	18.7433					28.2335	15.8448					27.7244	11.2245
		24.2568	16.941					23.8995	13.9623					19.8922	14.825
		26.4963	16.2977					24.4423	14.3845					16.576	12.7766
		18.5227	16.9772					27.9634	12.9645					26.8047	13.5368
		35.4753	22.7531					27.3854	13.3178					25.2334	12.809
		25.6125	22.6119					22.0481	12.2494					20.6077	11.4812
		27.0717	19.2807					31.5297	15.1408					24.3521	11.5918
		31.2213	20.1499					23.6562	12.6734					20.4781	12.351
		26.0171	18.4885					23.9177	14.4131					25.642	12.8368
		28.0913	19.3957					25.9062	13.6225					28.9215	14.5273
		24.7095	17.5795					24.3521	14.3836					20.3647	10.6282
		25.9165	19.1921					30.5968	17.0265					17.6036	7.72321
		23.4071	14.3843					28.1222	13.5146					17.3066	10.2497
								26.108	13.0124					23.7588	13.3688
								24.4402	13.2494					25.4646	12.2456
								26.9717	15.1039					25.9797	13.1628
								26.9105	14.4346					22.8621	10.7484
								27.7387	13.8494					25.8359	15.9698
								22.9001	12.3931					24.8516	13.5274
								22.5373	12.3994					22.637	10.9011
								27.2663	14.9942					28.4894	15.4292
								23.6886	14.5319					25.5745	13.0842
								26.0068	13.5141					29.7931	14.2584
								22.5231	15.7536					15.4464	10.9573
								19.9821	11.8457					21.8428	11.4676
								24.551	17.4206					23.6524	11.4713
								26.599	13.9621					23.8743	10.8347
								26.505	13.6013
								22.1945	12.8096
								24.4009	15.9129
								23.6638	13.1573
								19.3626	12.9066
								29.4091	13.93
								30.9365	12.9682
								26.985	12.705
								28.3746	18.0532
								28.6306	16.0005
								17.7802	12.5764
								25.4118	14.1687
								20.635	13.9966
								22.3914	15.9189
								31.3163	18.2772
								23.2964	14.6744
								26.4847	11.721
								22.7763	11.4672
								24.2953	14.5991
								16.2862	10.8241
								26.3961	17.178
								21.9672	12.9156
								20.465	12.6465
								30.2671	9.38777
								32.1819	12.2794
								24.0341	13.607
								28.6476	14.9837
								27.8253	15.3513
								20.9557	13.6952
								23.3457	16.8275
								25.9027	13.3983
								30.5617	14.7082
								26.2873	15.8732
								30.9214	15.7583
								25.7675	13.6391
								26.8919	15.7914
								27.0703	14.615
								23.4524	15.4243
								29.1481	23.0929
								22.2147	13.6559
								28.0457	18.1584
								30.8949	18.9259
								38.4566	20.0725
								27.6064	16.0949
								21.5389	16.1853
								28.8018	17.7977
								22.5373	15.7462
								26.6471	12.4876
								23.4672	13.3202
								23.9733	15.1658
								22.1622	12.6051
								20.3395	12.1395
								24.0155	13.4723
								24.9379	14.4095
								28.6096	12.0479
								26.1467	14.6885
								30.5701	14.5186
								20.7149	12.3548
								23.602	11.5664
								25.8908	12.5444
								26.5475	13.8121
								22.2831	11.7394
								26.0176	13.5016
								25.3594	13.1689
								25.4682	10.7431
								26.9352	20.0813
								28.2911	13.624
								37.2968	21.1706
