# Supplementary material for: Kinesin-6 Klp9 orchestrates spindle elongation by regulating microtubule sliding and growth
Source: eLife. 2021 Jun 3;10:e67489. doi: 10.7554/eLife.67489 (PMC8205488; doi:10.7554/eLife.67489)
Supplement: Supplementary file 1. [file elife-67489-supp1.xlsx]

## Sheet: Sheet1
Designation	Identifier	Genotype	Source
wild type (wt)	TP2927	h- mCherry-atb2:hphMX6 leu1:sid4-GFP leu1-32 ura4-D18	Lab collection
cut7-24	TP4746	h- cut7-24 mCherry-atb2:hphMX6 leu1:sid4-GFP leu1-32 ura4-D18	This study
cdc13-GFP	TP473	h- cdc13-GFP:natMX6 mCherry-atb2:hphMX6 leu1-32 ura4-D18 ade6-	Lab collection
cut7-24 cdc13-GFP	TP4772	h+ cut7-24 cdc13-GFP:natMX6 mCherry-atb2:hphMX6 leu1-32 ura4-D18 ade6-	This study
klp9-GFP	TP3409	h- klp9-GFP:kanMX6 mCherry-atb2:hphMX6	Lab collection
cut7-24 klp9-GFP	TP4688	h- cut7-24 klp9-GFP:kanMX6 mCherry-atb2:hphMX6	This study
ase1-GFP	TP3420	h- ase1-GFP:kanMX6 mCherry-Atb2:hphMX6	Lab collection
cut7-24 ase1-GFP	TP4852	h- cut7-24 ase1-GFP:kanMX6 mCherry-Atb2:hphMX6	This study
klp9Δ	TP4747	h- klp9Δ:kanMX6 mCherry-atb2:hphMX6 leu1:sid4-GFP leu1-32 ura4-D18	This study
cut7-24 klp9Δ	TP4748	h- cut7-24 klp9Δ:kanMX6 mCherry-atb2:hphMX6 leu1:sid4-GFP leu1-32 ura4-D18	This study
klp9Δ cdc13-GFP	TP4998	h- cdc13-GFP:natMX6 klp9Δ:kanMX6 mCherry-atb2:hphMX6	This study
cut7-24 klp9Δ cdc13-GFP	TP4777	h- cut7-24 cdc13-GFP:natMX6 klp9Δ:kanMX6 mCherry-atb2:hphMX6	This study
cut7-24	TP4695	h+ cut7-24 mCherry-atb2:hphMX6 leu1-32 ura4-D18 ade6-	This study
cut7-24 klp9 leu1:sid4-GFP	TP4694	h- cut7-24 klp9Δ:kanMX6 mCherry-atb2:hphMX6 leu1-32 ura4-D18 ade6-	This study
cut7-24 klp9Off	TP4750	h- cut7-2 pnmt81-klp9:kanMX6 mCherry-Atb2:hphMX6 leu1-32 ura4-D18 ade6-	This study
cut7-24 ase1Δ	TP4790	h- cut7-24 ase1Δ:ura4+ mCherry-atb2:hphMX6 leu1-32 ura4-D18 ade6-	This study
cut7-24 mal3Δ	TP4797	h- cut7-24 mal3Δ:kanMX6 mCherry-atb2:hphMX6 leu1-32 ura4-D18 ade6-	This study
cut7-24 dis1Δ	TP4798	h- cut7-24 dis1Δ:ura4+ mCherry-atb2:hphMX6 leu1-32 ura4-D18 ade6-	This study
cut7-24 alp14Δ	TP4825	h- cut7-24 alp14Δ:kanMX6 mCherry-atb2:hphMX6 leu1-32 ura4-D18 ade6-	This study
cut7-24 alp7Δ	TP4827	h- cut7-24 alp7Δ:kanMX6 mCherry-atb2:hphMX6 leu1-32 ura4-D18 ade6-	This study
sad1-1	TP4936	h- sad1-1 mCherry-atb2:hphMX6 leu1-32 ura4-D18 ade6-	This study
sad1-1	TP4937	h+ sad1-1 mCherry-atb2:hphMX6 leu1:sid4-GFP leu1-32 ura4-D18 ade6-	This study
sad1-1 klp9Δ	TP4945	h+ sad1-1 klp9Δ:ura4+ mCherry-atb2:hphMX6 leu1-32 ura4-D18 ade6-	This study
sad1-1 dis1Δ	TP4949	h+ sad1-1 dis1Δ:ura4+ mCherry-atb2:hphMX6 leu1-32 ura4-D18 ade6-	This study
sad1-1 cut7Δpkl1Δ	TP4939	h+ sad1-1 cut7Δ:natMX6 pkl1Δ:ura4+ mCherry-atb2:hphMX6 leu1-32 ura4-D18 ade6-	This study
sad1-1 pkl1Δ	TP4941	h+ sad1-1 pkl1Δ:ura4+ mCherry-atb2:hphMX6 leu1-32 ura4-D18 ade6-	This study
sad1-1 klp9-GFP	TP4953	h+ sad1-1 klp9-GFP:kanMX6 mCherry-atb2:hphMX6 leu1-32 ura4-D18 ade6-	This study
sad1-1 cut7-GFP	TP4955	h+ sad1-1 cut7-GFP:kanMX6 mCherry-atb2:hphMX6 leu1-32 ura4-D18 ade6-	This study
dis1Δ cdc13-GFP	TP5000	h- dis1Δ:ura4+ cdc13-GFP:natMX6 mCherry-atb2:hphMX6	This study
cut7-24 dis1Δ cdc13-GFP	TP4999	h+ cut7-24 dis1Δ:ura4+ cdc13-GFP:natMX6 mCherry-atb2:hphMX6	This study
cls1-3xGFP	TP5420	h- cls1-3xGFP:kanMX6 mCherry-atb2:hohMX6	This study
klp9Δ cls1-3xGFP	TP5422	h- klp9Δ:natMX6 cls1-3xGFP:kanMX6 mCherry-atb2:hphMX6	This study
cut-24 cls1-3x-GFP	TP5435	h- cut7-24 cls1-3xGFP:kanMX6 mCherry-atb2:hohMX6	This study
wt	TP5425	h- mCherry-atb2:hphMX6 leu1-32 ura4-D18	This study
dis1Δ	TP5426	h- dis1Δ:kanMX6 mCherry-atb2:hphMX6 leu1-32 ura4-D18	This study
klp9Δ	TP5158	h- klp9Δ:natMX6 mCherry-atb2:hphMX6 leu1-32 ura4-D18	This study
dis1Δ klp9Δ	TP5447	h- klp9Δ:natMX6 dis1Δ:kanMX6 mCherry-atb2:hphMX6 leu1-32 ura4-D18	This study
dis1-GFP	TP3178	h- dis1-GFP:natMX6 mCherry-atb2:hphMX6 leu1-32 ura4-D18	Lab collection
dis1-GFP klp9Δ	TP4846	h- dis1-GFP:natMX6 klp9Δ:kanMX6 mCherry-atb2:hphMX6 leu1-32 ura4-D18	This study
dis1Δ klp9-GFP	TP5003	h+ dis1Δ:ura4+ klp9-GFP:kanMX6 mCherry-atb2:hphMX6 leu1-32 ura4-D18	This study
pnmt81-dis1 klp9-GFP	TP4966	h+ pnmt81-dis1:kanMX6 klp9-GFP:natMX6 mCherry-atb2:hphMX6 leu1-32 ura4-D18	This study
cut7-24 dis1-GFP	TP4842	h- cut7-24 dis1-GFP:natMX6 mCherry-atb2:hphMX6 leu1-32 ura4-D18	This study
klp9-mCherry dis1-GFP	TP4971	h- klp9-mCherry: kanMX6 Dis1-GFP:natMX6	This study
clp1Δ klp9-mCherry dis1-GFP	TP4972	h+ clp1Δ:hphMX6 klp9-mCherry: kanMX6 Dis1-GFP:natMX6	This study
cut7-24 clp1Δ klp9-GFP	TP 5811	h+ cut7-24 clp1Δ:natMX6 klp9-GFP: kanMX6	This study
cut7-24 clp1Δ mCherry-Atb2	TP 5813	h+ cut7-24 clp1Δ:natMX6 mCherry-Atb2:hphMX6	This study
klp9-mCherry dis1-WT-GFP	TP5265	h+ dis1-WT-GFP:kanMX6 klp9-mCherry:hphMX6 dis1Δ:natMX6	This study
klp9-mCherry dis16E-GFP	TP5268	h- dis1-6E-GFP:kanMX6 klp9-mCherry:hphMX6 dis1Δ:natMX6	This study
klp9-mCherry dis16A-GFP	TP5267	h- dis1-6A-GFP:kanMX6 klp9-mCherry:hphMX6 dis1Δ:natMX6	This study
cut7-24 klp9-mCherry dis16E-GFP	TP 5821	h- cut7-24 dis1-6E-GFP:kanMX6 klp9-mCherry:hphMX6 dis1Δ:natMX6	This study
cut7-24 klp9-mCherry dis16A-GFP	TP 5819	h- cut7-24 dis1-6A-GFP:kanMX6 klp9-mCherry:hphMX6 dis1Δ:natMX6	This study
klp93A-mCherry wt-dis1-GFP	TP5474	h+ klp9-3A-mCherry:hphMX6 dis1-WT-GFP:kanMX6 dis1Δ:natMX6	This study
klp93A-mCherry dis16A-GFP	TP5476	h+ klp9-3A-mCherry:hphMX6 dis1-6A-GFP:kanMX6 dis1Δ:natMX6	This study
clp1Δ	TP5288	h+ clp1Δ:natMX6 mCherry-atb2:hphMX6	This study
ase1Δ klp9-mCherry dis1-GFP	TP5240	h+ ase1Δ:hphMX6 lp9-mCherry: kanMX6 Dis1-GFP:natMX6	This study
