# Supplementary figures and images for: Kinesin-6 Klp9 orchestrates spindle elongation by regulating microtubule sliding and growth
Source: eLife journal article supplement (doi:10.7554/elife.67489), 2021-06-03

## *cut7-24*

mCh-Atb2

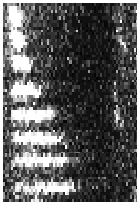

Dis1-EGFP

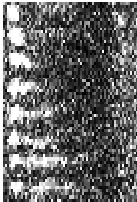

merge

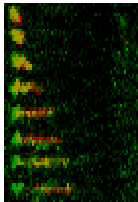

Supplement: supp [file elife-67489-supp-v1.zip]

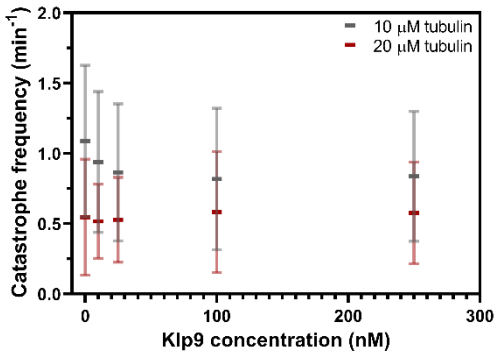

Supplement: supp [file elife-67489-supp-v1.zip]

*dis1Δ*

*cut7-24 dis1Δ*

⋮

mCh-Atb2 Cdc13-GFP

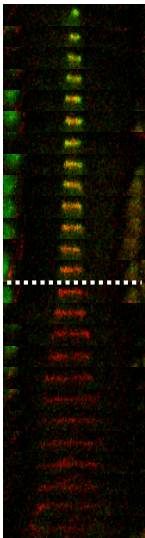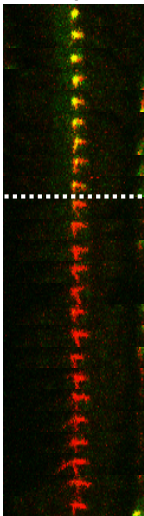

Supplement: supp [file elife-67489-supp-v1.zip]

*cut7-24*

mCh-Atb2 Cls1-3xGFP

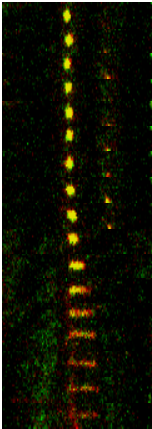

Supplement: supp [file elife-67489-supp-v1.zip]

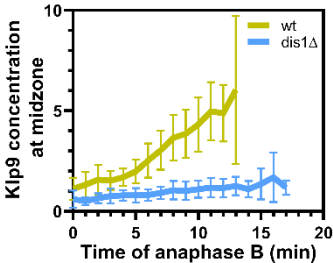

Supplement: supp [file elife-67489-supp-v1.zip]

A

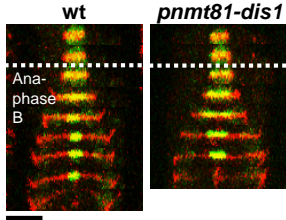

B

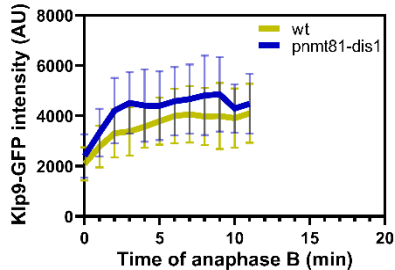

C

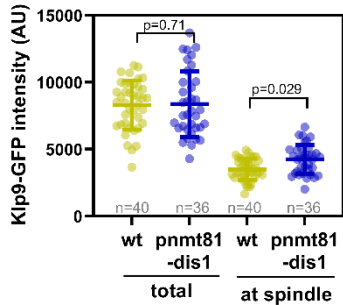

Supplement: supp [file elife-67489-supp-v1.zip]

# Klp9

kDa

170

130

100

70

55

44

35

25

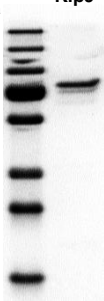

Supplement: supp [file elife-67489-supp-v1.zip]

# *sad1-1*

mCh-Atb2 Sid4-GFP

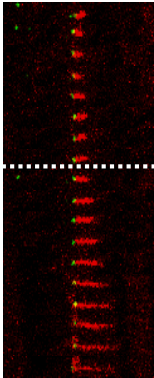

mCh-Atb2 Klp9-GFP

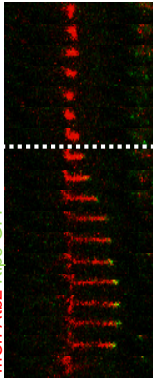

mCh-Atb2 Cut7-GFP

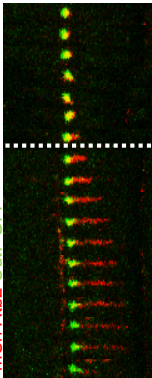

Supplement: supp [file elife-67489-supp-v1.zip]

*cut7-24*

mCh-Atb2 Sid4-GFP

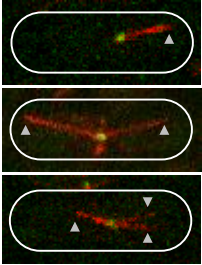

Supplement: supp [file elife-67489-supp-v1.zip]

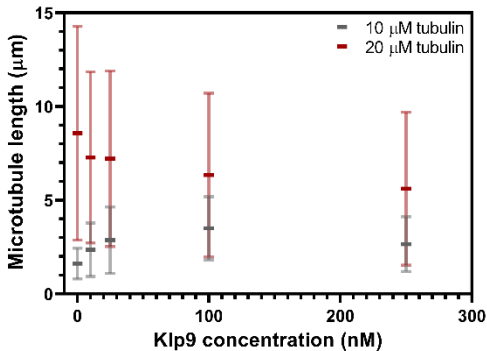

Supplement: supp [file elife-67489-supp-v1.zip]

wt

*klp9Δ*

mCh-Atb2 CIs1-3xGFP

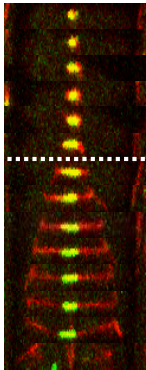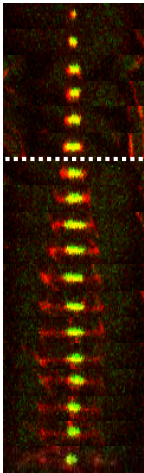

Supplement: supp [file elife-67489-supp-v1.zip]

## Metaphase

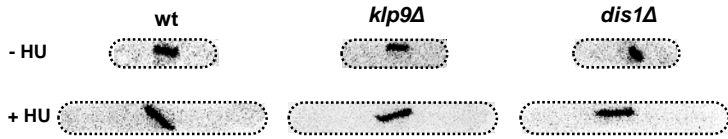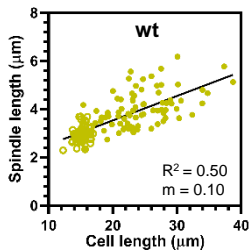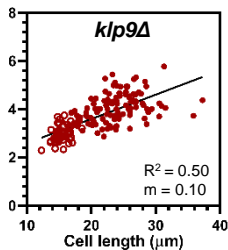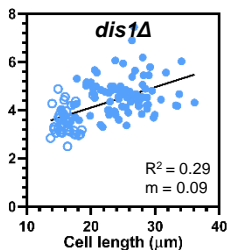

Supplement: supp [file elife-67489-supp-v1.zip]

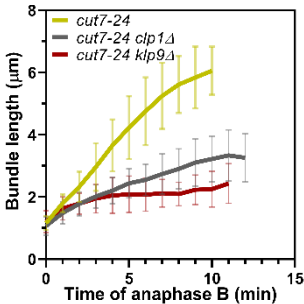

Supplement: supp [file elife-67489-supp-v1.zip]

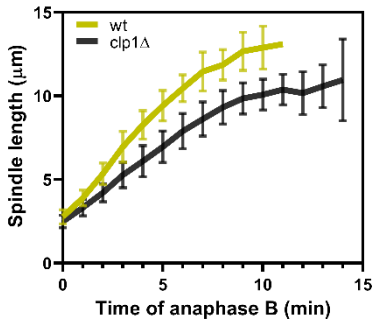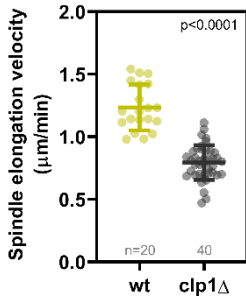

Supplement: supp [file elife-67489-supp-v1.zip]

**A**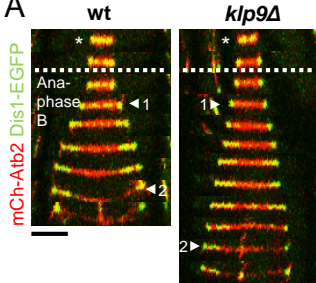**B**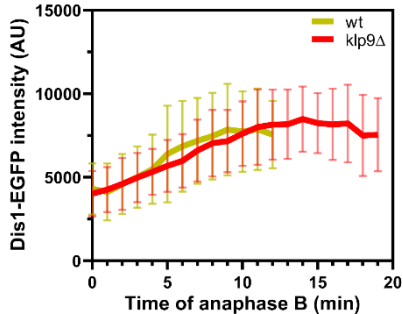**C**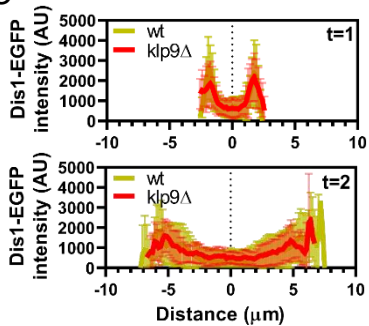

Supplement: supp [file elife-67489-supp-v1.zip]

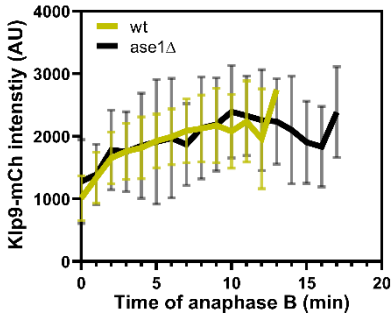

Supplement: supp [file elife-67489-supp-v1.zip]

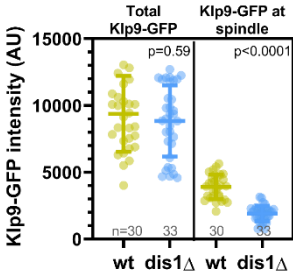

Supplement: supp [file elife-67489-supp-v1.zip]

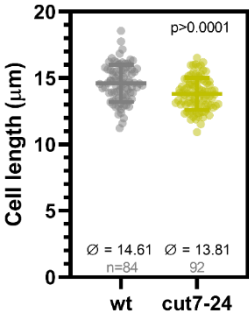

Supplement: supp [file elife-67489-supp-v1.zip]

wt

*ase1Δ*

Klp9-mCherry Dis1-EGFP

Ana-  
phase  
B

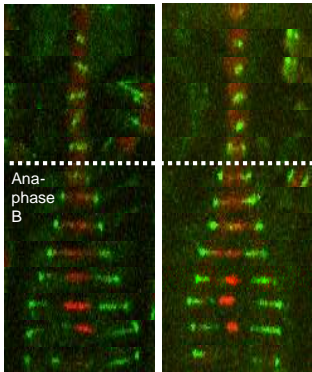

Supplement: supp [file elife-67489-supp-v1.zip]

Cell length ( $\mu\text{m}$ )

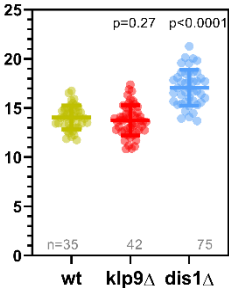

Supplement: supp [file elife-67489-supp-v1.zip]

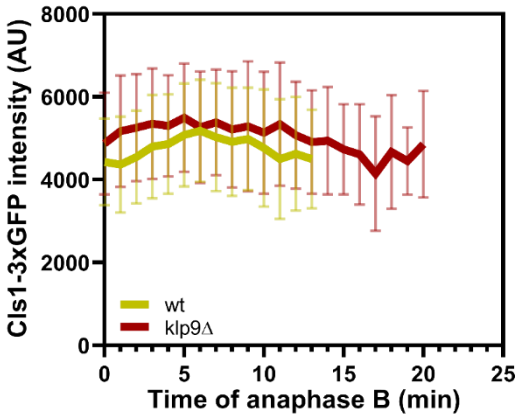

Supplement: supp [file elife-67489-supp-v1.zip]
